# Supplementary material for: Synthesis of a Novel Series of Cu(I) Complexes Bearing Alkylated 1,3,5-Triaza-7-phosphaadamantane as Homogeneous and Carbon-Supported Catalysts for the Synthesis of 1- and 2-Substituted-1,2,3-triazoles
Source: MDPI journal article supplement (doi:10.3390/nano11102702), 2021-10-13
Supplement: s1 [file s1]

# Electronic Supplementary Materials

## Synthesis of a Novel Series of Cu(I) Complexes Bearing Alkylated 1,3,5-Triaza-7-phosphaadamantane as Homogeneous and Carbon-Supported Catalysts for the Synthesis of 1- and 2-Substituted-1,2,3-triazoles

Ivy L. Librando<sup>1</sup>, Abdallah G. Mahmoud<sup>1,2,\*</sup>, Sónia A. C. Carabineiro<sup>1,3</sup>,  
M. Fátima C. Guedes da Silva<sup>1</sup>, Carlos F. G. C. Geraldès<sup>4,5</sup> and Armando J. L. Pombeiro<sup>1,6</sup>

<sup>1</sup> Centro de Química Estrutural, Instituto Superior Técnico, Universidade de Lisboa, Av. Rovisco Pais, 1049-001 Lisboa, Portugal; ivy.librando@tecnico.ulisboa.pt (I.L.L.); sonia.carabineiro@fct.unl.pt (S.A.C.C.); fatima.guedes@tecnico.ulisboa.pt (M.F.C.G.d.S.); pombeiro@tecnico.ulisboa.pt (A.J.L.P.)

<sup>2</sup> Department of Chemistry, Faculty of Science, Helwan University, Ain Helwan, Cairo 11795, Egypt

<sup>3</sup> LAQV-REQUIMTE, Department of Chemistry, NOVA School of Science and Technology, Universidade NOVA de Lisboa, 2829-516 Caparica, Portugal

<sup>4</sup> Coimbra Chemistry Center, University of Coimbra, Rua Larga Largo D. Dinis, 3004-535 Coimbra, Portugal; geraldès@uc.pt

<sup>5</sup> Department of Life Sciences, Faculty of Science and Technology, Calçada Martim de Freitas, 3000-393 Coimbra, Portugal

<sup>6</sup> Research Institute of Chemistry, Peoples' Friendship University of Russia (RUDN University), 6 Miklukho-Maklaya Street, 117198 Moscow, Russia

\* Correspondence: abdallah.mahmoud@tecnico.ulisboa.pt

**Keywords:** copper complexes; P-ligands; PTA; carbon nanotubes; click chemistry; CuAAC

### Contents

|                                                                                                                                                                                                              |    |
|--------------------------------------------------------------------------------------------------------------------------------------------------------------------------------------------------------------|----|
| 1. NMR Spectra of Compounds 1–7 .....                                                                                                                                                                        | 2  |
| 2. X-Ray Data and Analysis .....                                                                                                                                                                             | 59 |
| 3. Plausible Anchorage of Cationic Cu(I) Complexes [CuBr <sub>2</sub> (PTA-CH <sub>2</sub> - <i>m</i> -NO <sub>2</sub> -C <sub>6</sub> H <sub>4</sub> ) <sub>2</sub> ] <sup>+</sup> on Carbon Materials..... | 60 |
| 4. FTIR Spectra of CNT-ox-Na Materials (2000–400 cm <sup>-1</sup> ) .....                                                                                                                                    | 63 |
| 5. NMR Spectra of Triazole Products .....                                                                                                                                                                    | 65 |
| 6. ESI-MS (Positive Mode) Spectra of Triazole Products .....                                                                                                                                                 | 88 |

## 1. NMR Spectra of Compounds 1–7

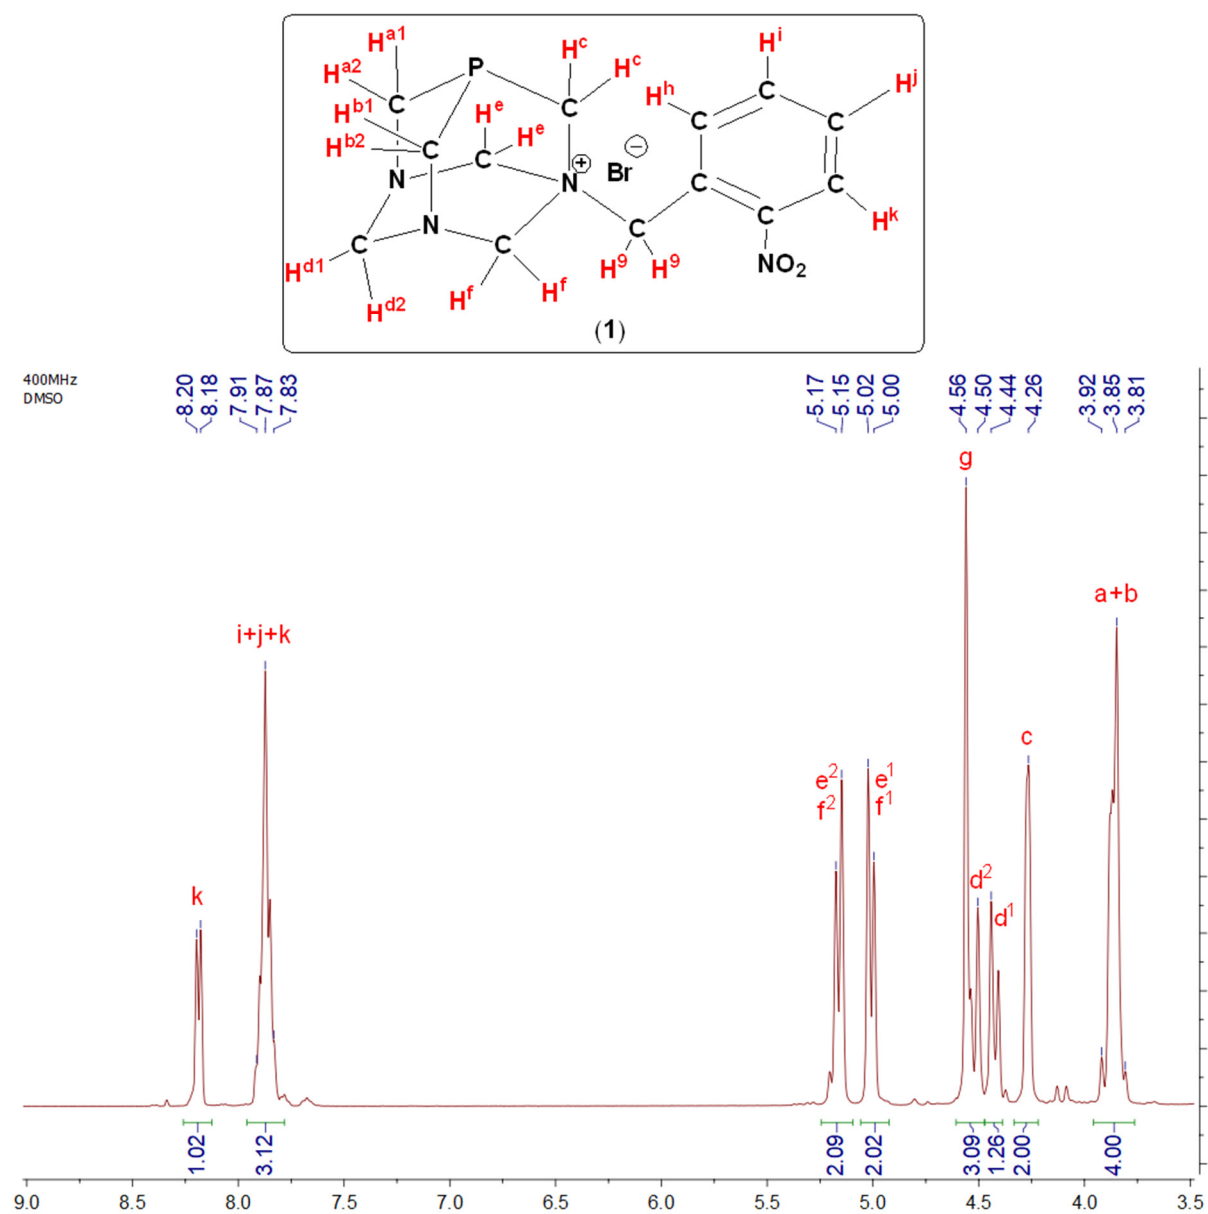

**Figure S1.** <sup>1</sup>H NMR spectrum of (PTA-CH<sub>2</sub>-*o*-NO<sub>2</sub>-C<sub>6</sub>H<sub>4</sub>)Br (1) in DMSO-*d*<sub>6</sub> (400 MHz).

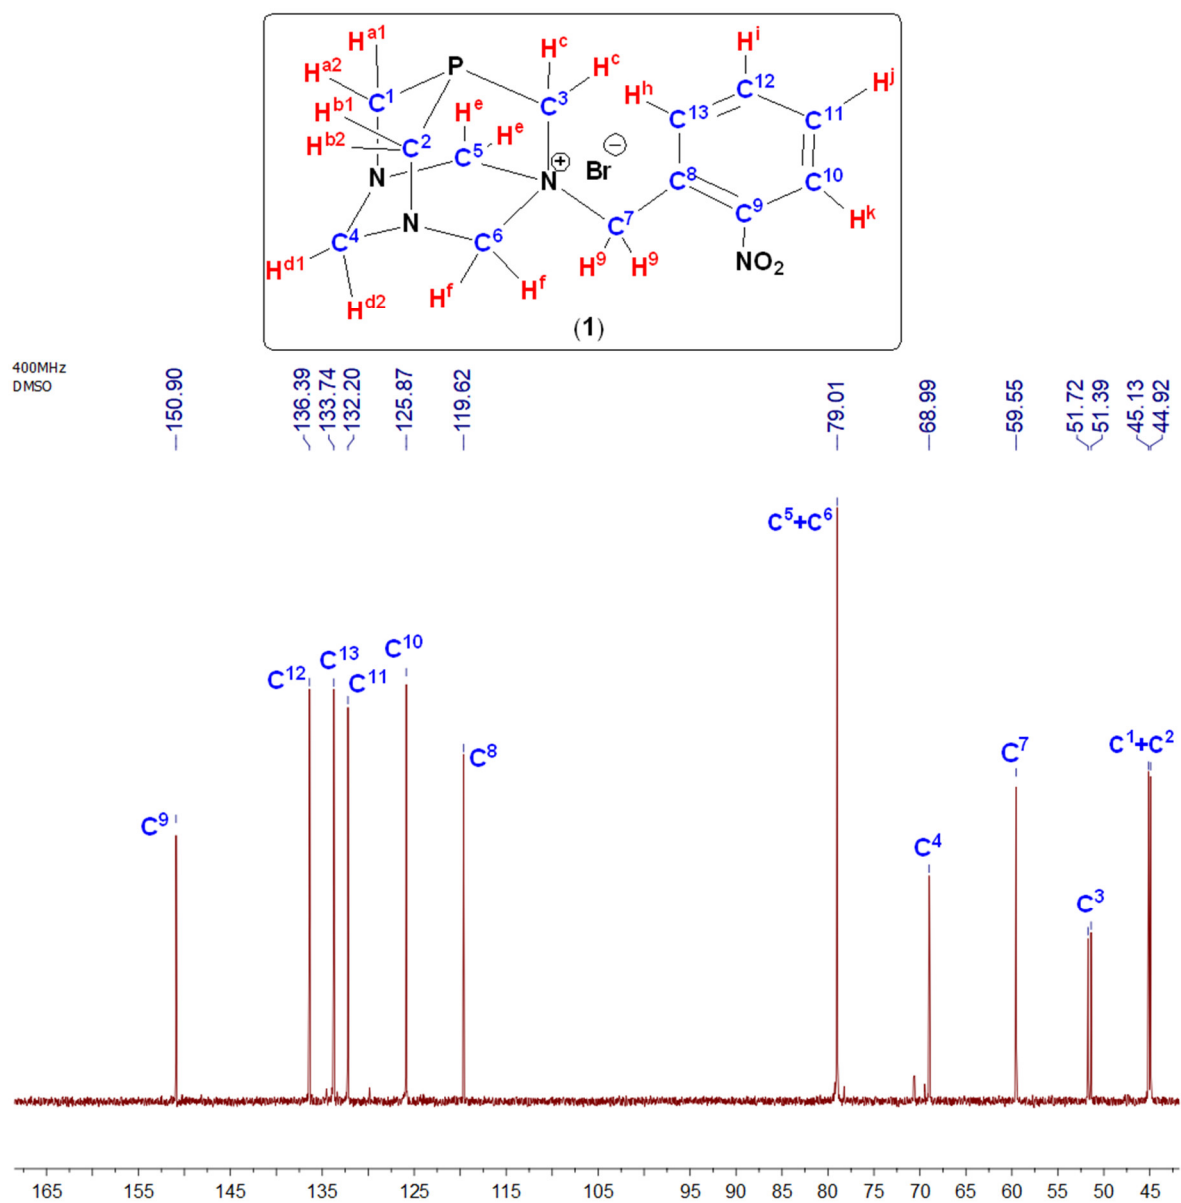

**Figure S2.**  $^{13}\text{C}$  NMR spectrum of (PTA-CH<sub>2</sub>-o-NO<sub>2</sub>-C<sub>6</sub>H<sub>4</sub>)Br (**1**) in DMSO-*d*<sub>6</sub> (400 MHz).

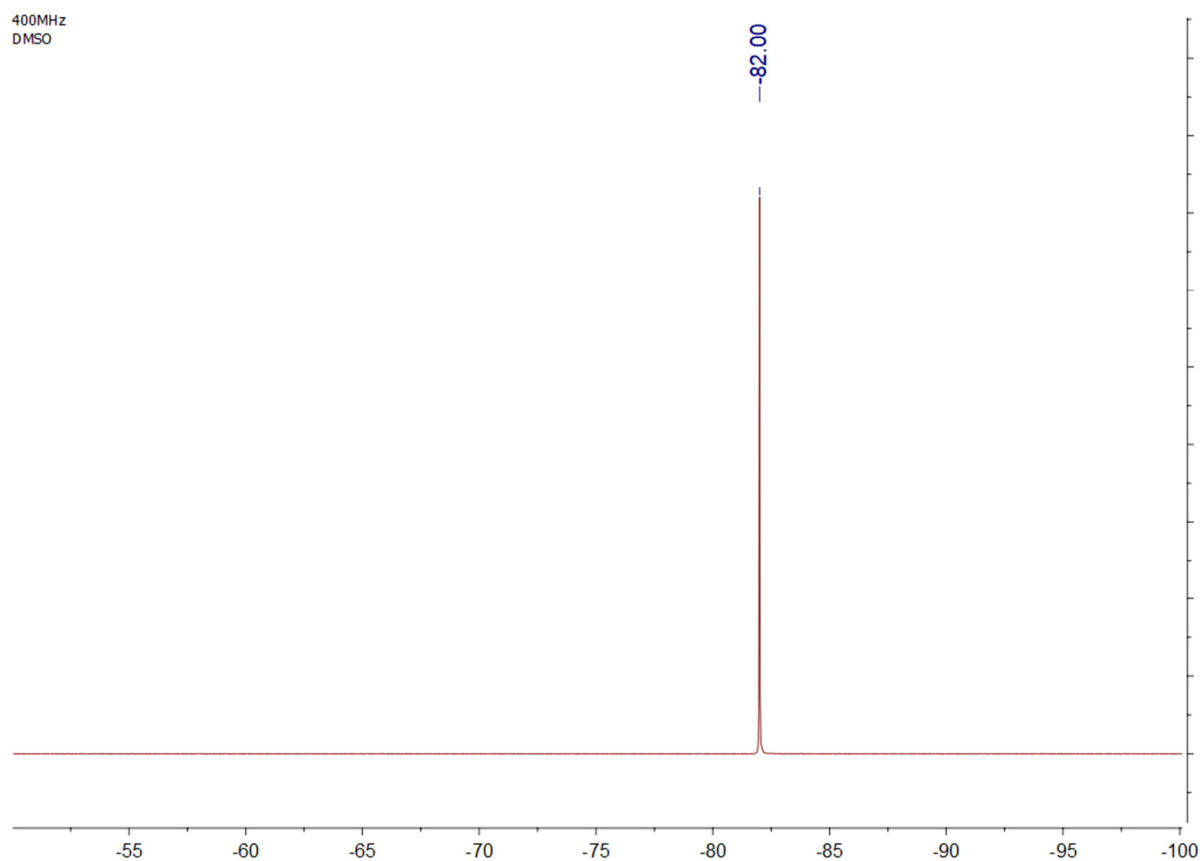

**Figure S3.**  $^{31}\text{P}$  NMR spectrum of (PTA-CH<sub>2</sub>-*o*-NO<sub>2</sub>-C<sub>6</sub>H<sub>4</sub>)Br (**1**) in DMSO-*d*<sub>6</sub> (400 MHz).



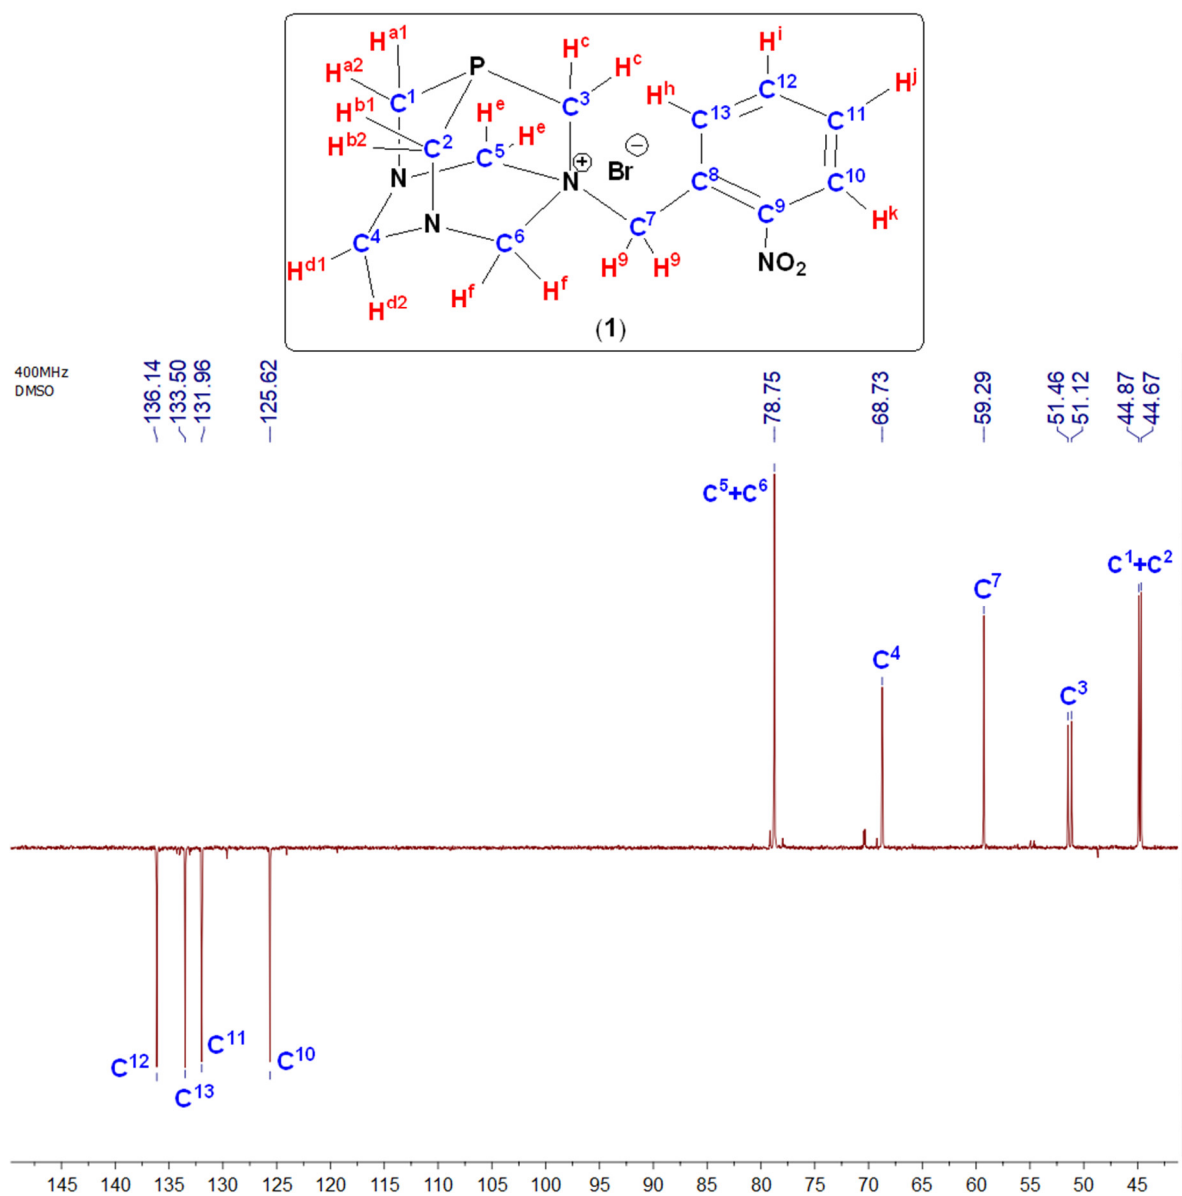

**Figure S4.** DEPT NMR spectrum of (PTA-CH<sub>2</sub>-*o*-NO<sub>2</sub>-C<sub>6</sub>H<sub>4</sub>)Br (**1**) in DMSO-*d*<sub>6</sub> (400 MHz).

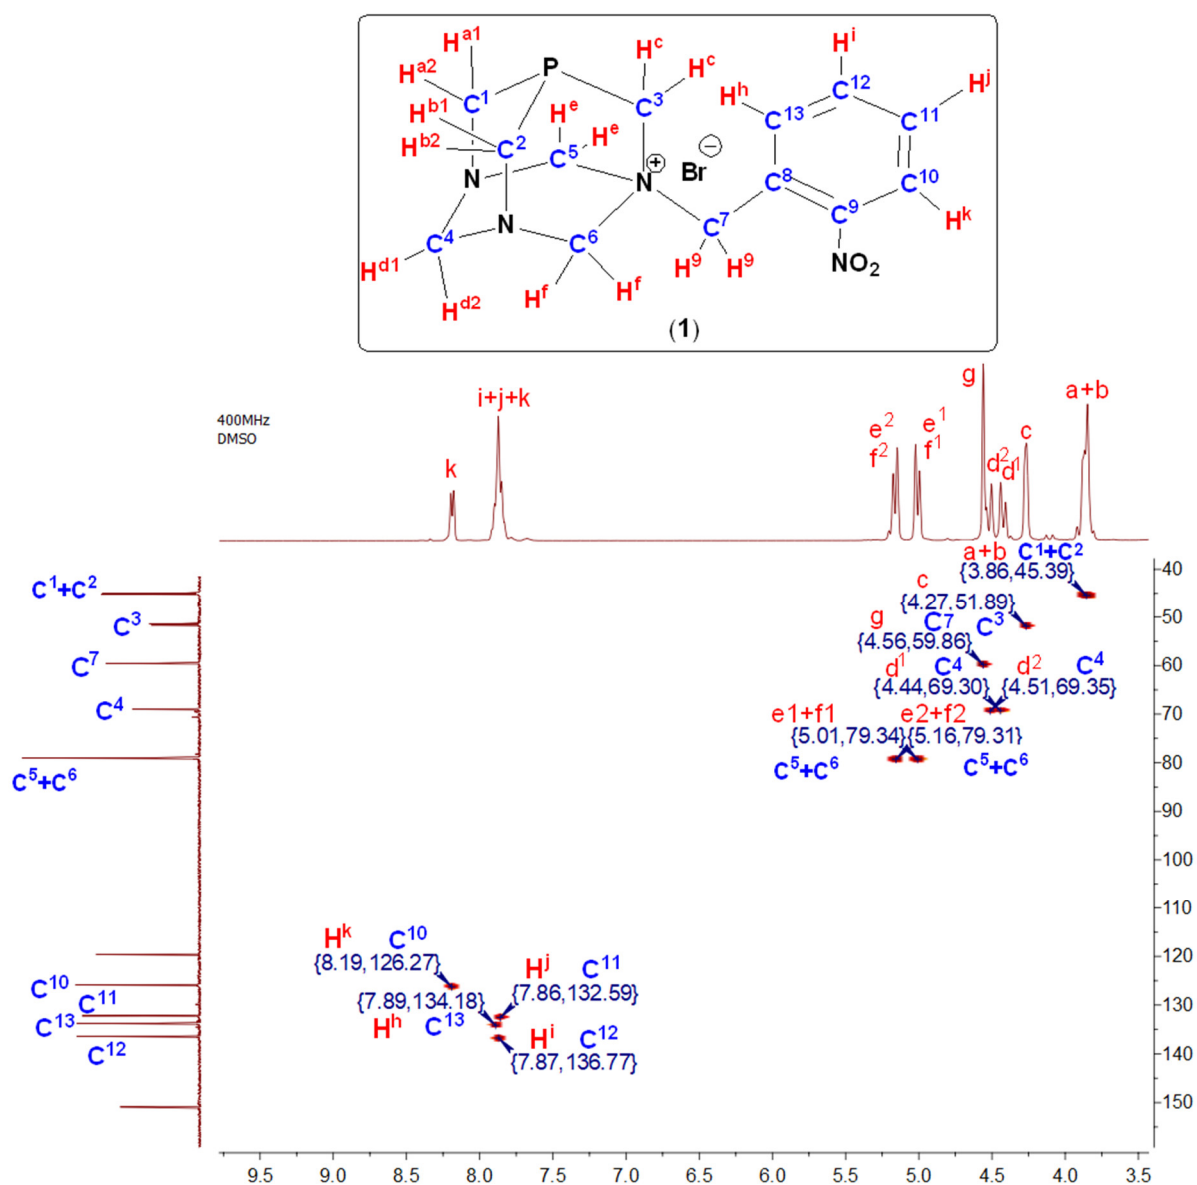

Figure S5. HSQC spectrum of (PTA-CH<sub>2</sub>-*o*-NO<sub>2</sub>-C<sub>6</sub>H<sub>4</sub>)Br (1) in DMSO-*d*<sub>6</sub> (400 MHz).

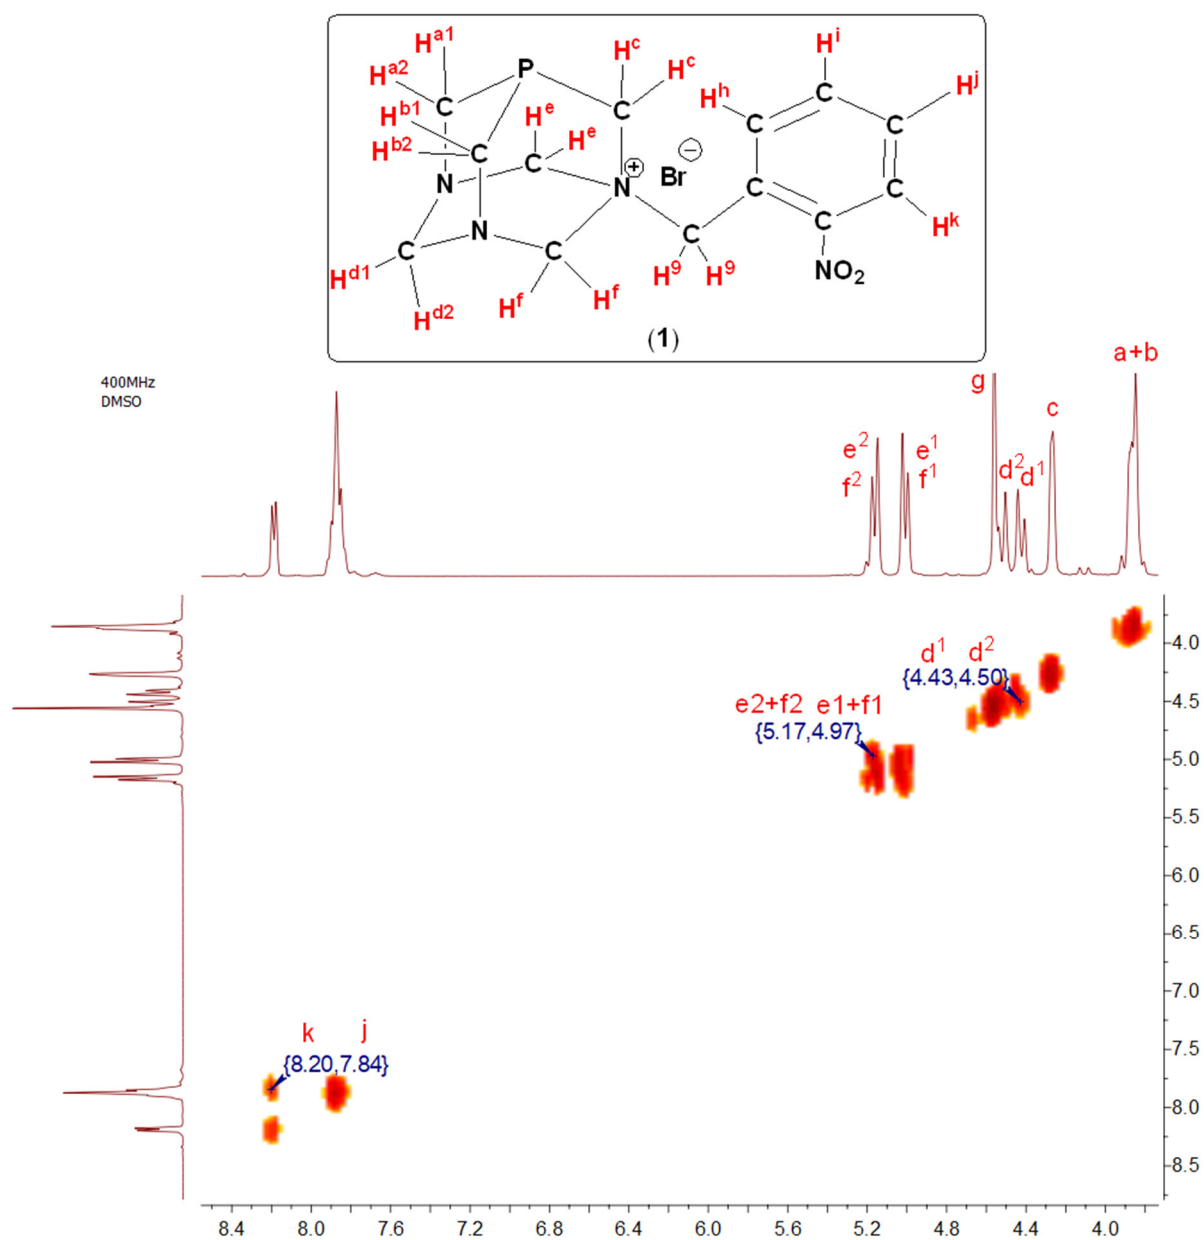

**Figure S6.** COSY spectrum of (PTA-CH<sub>2</sub>-*o*-NO<sub>2</sub>-C<sub>6</sub>H<sub>4</sub>)Br (**1**) in DMSO-*d*<sub>6</sub> (400 MHz).

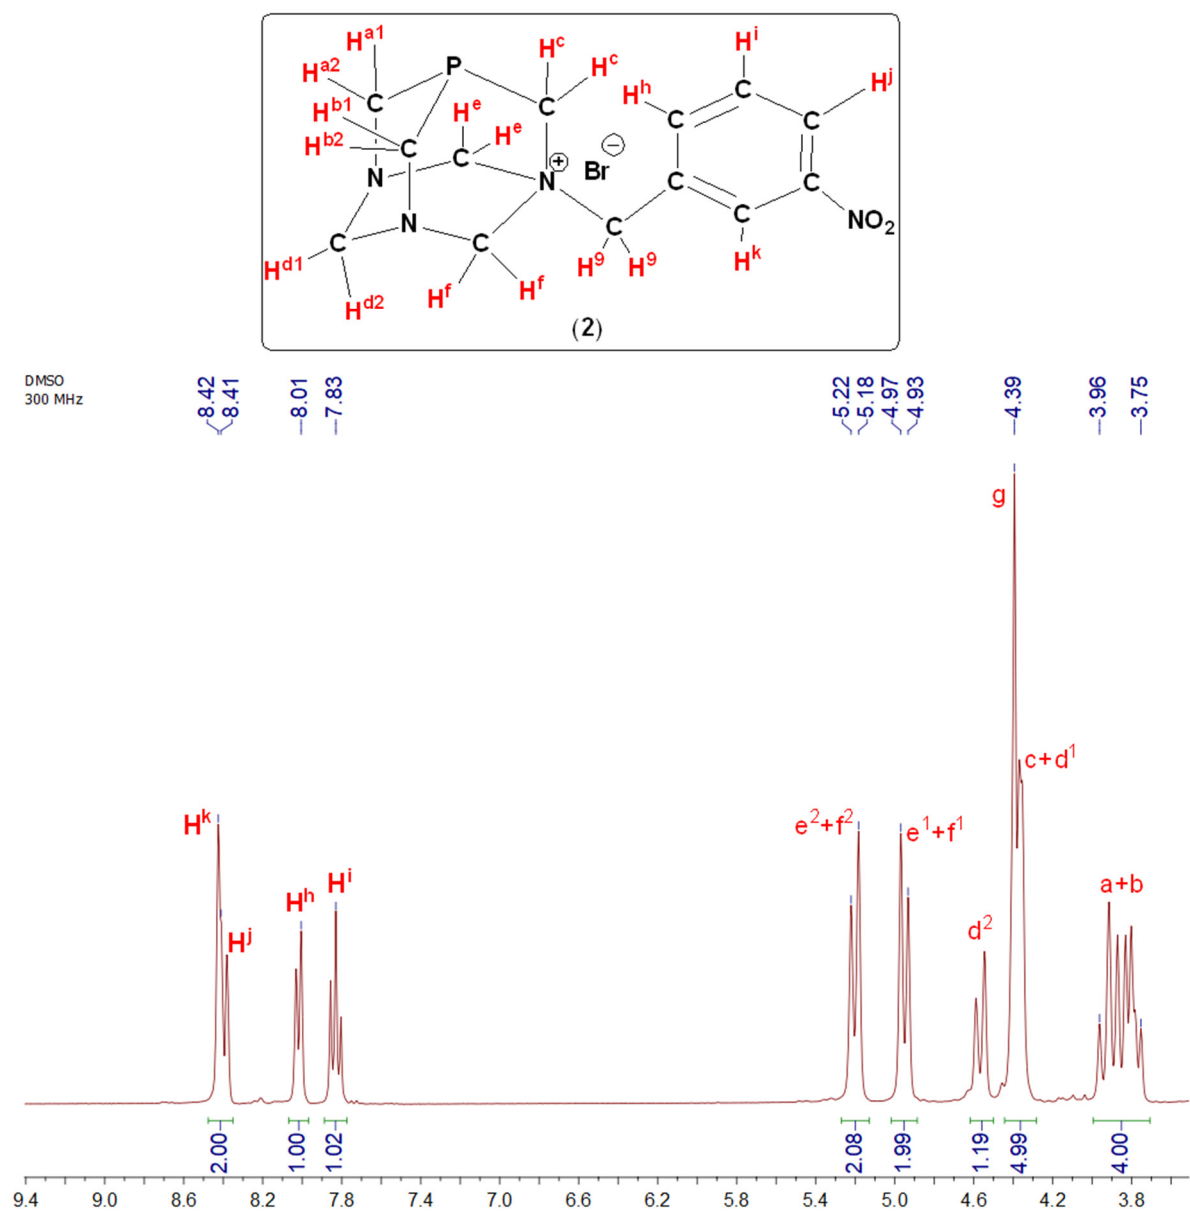

Figure S7. <sup>1</sup>H NMR spectrum of (PTA-CH<sub>2</sub>-*m*-NO<sub>2</sub>-C<sub>6</sub>H<sub>4</sub>)Br (2) in DMSO-*d*<sub>6</sub> (300 MHz).

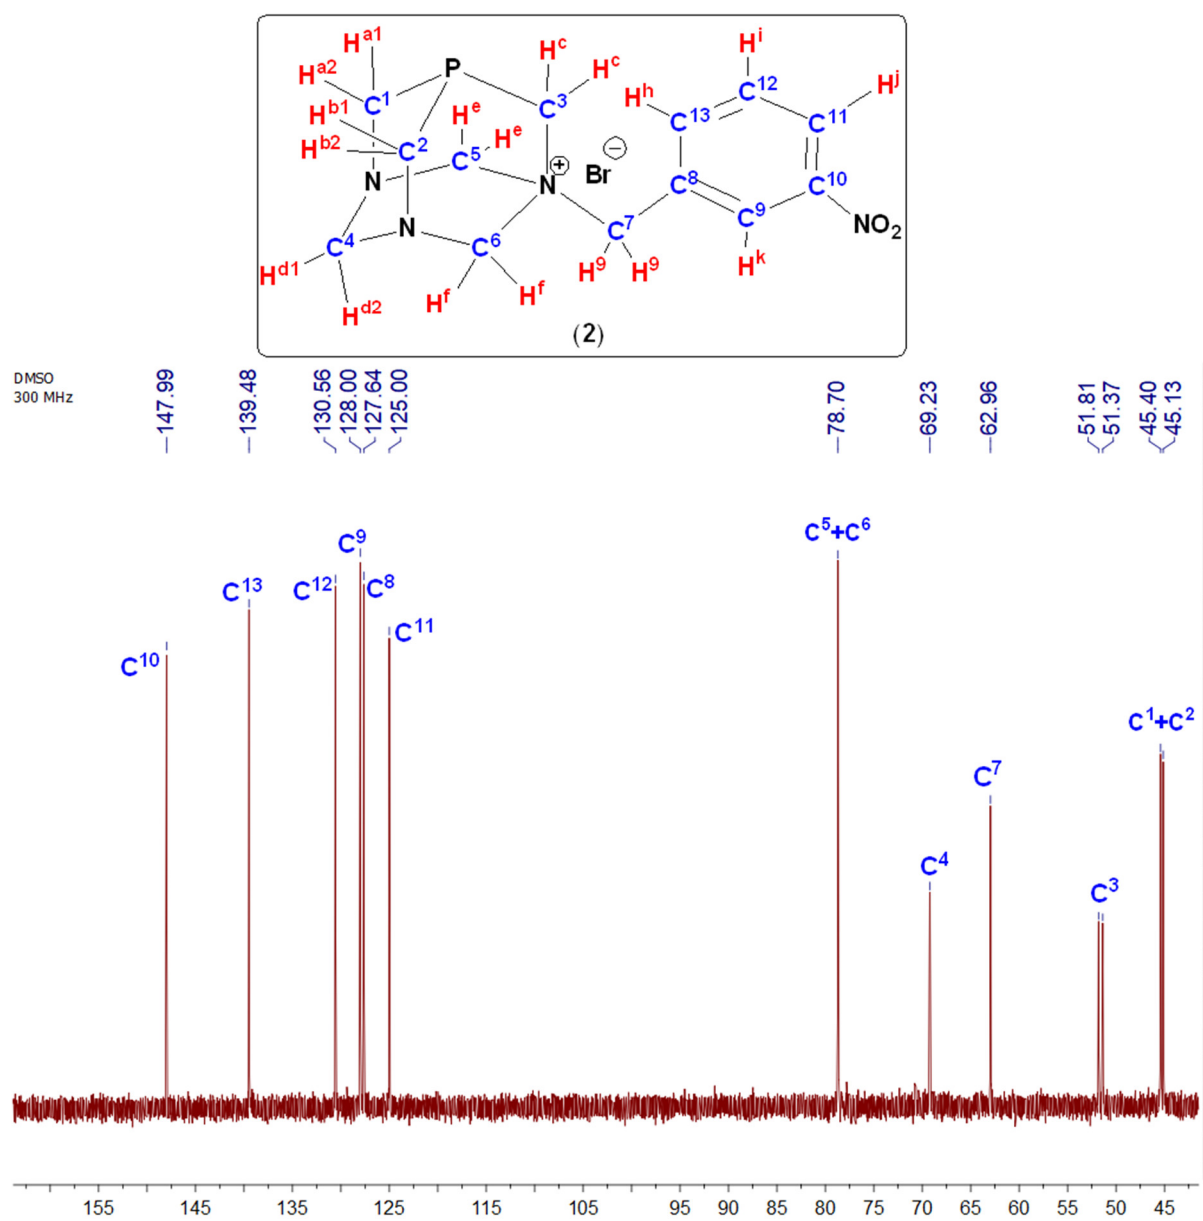

**Figure S8.** <sup>13</sup>C NMR spectrum of (PTA-CH<sub>2</sub>-*m*-NO<sub>2</sub>-C<sub>6</sub>H<sub>4</sub>)Br (2) in DMSO-*d*<sub>6</sub> (300 MHz).

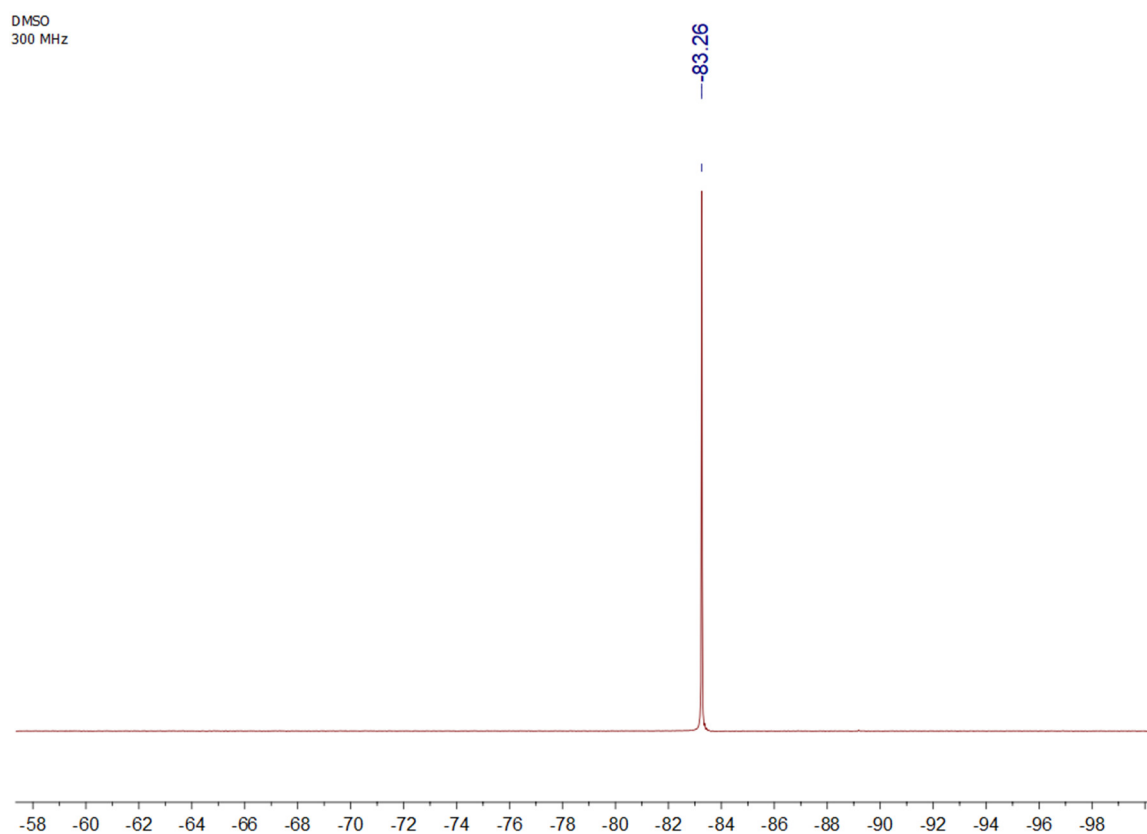

**Figure S9.**  $^{31}\text{P}$  NMR spectrum of (PTA-CH<sub>2</sub>-*m*-NO<sub>2</sub>-C<sub>6</sub>H<sub>4</sub>)Br (**2**) in DMSO-*d*<sub>6</sub> (300 MHz).

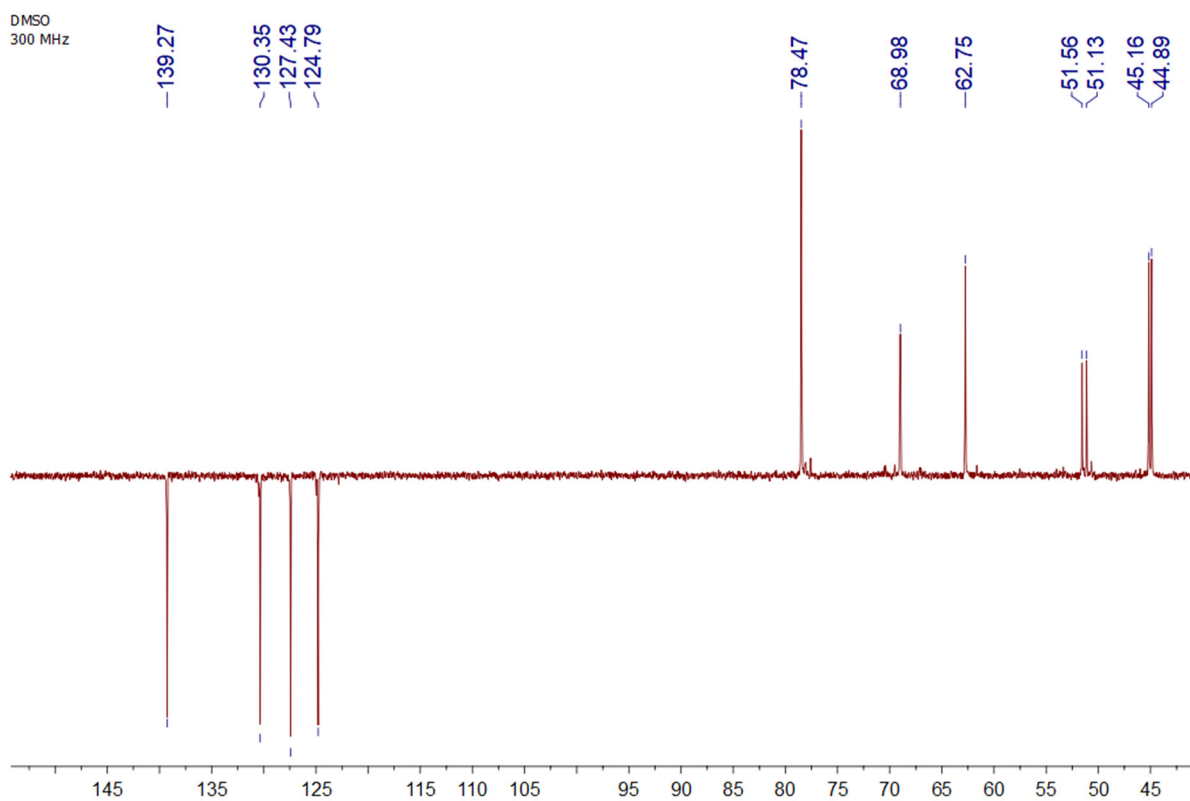

**Figure S10.** DEPT NMR spectrum of (PTA-CH<sub>2</sub>-*m*-NO<sub>2</sub>-C<sub>6</sub>H<sub>4</sub>)Br (**2**) in DMSO-*d*<sub>6</sub> (300 MHz).

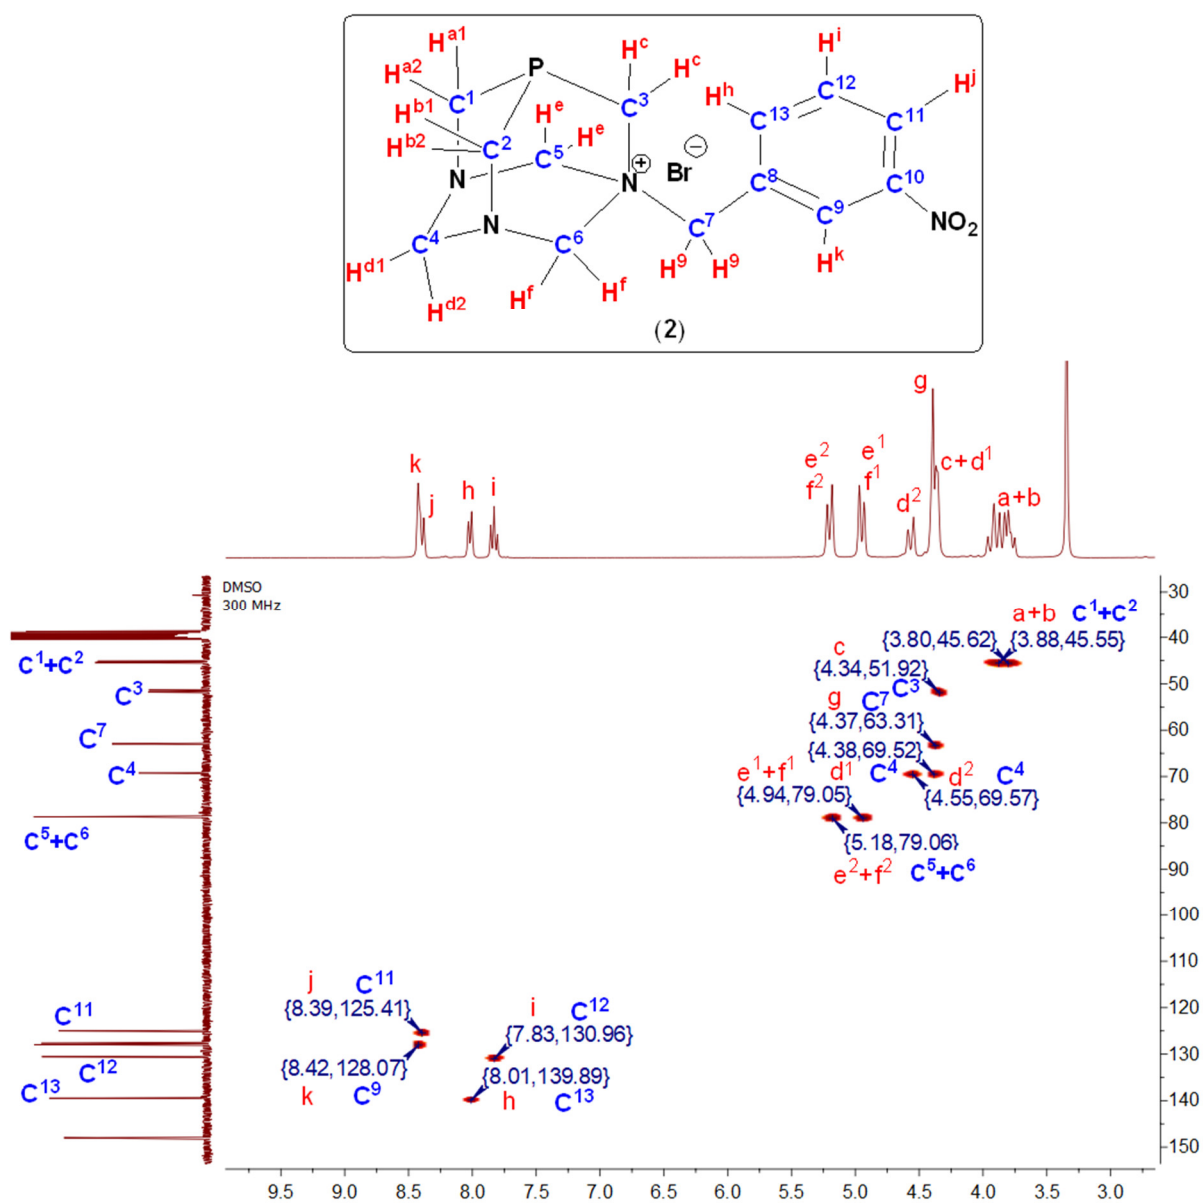

Figure S11. HSQC spectrum of (PTA-CH<sub>2</sub>-*m*-NO<sub>2</sub>-C<sub>6</sub>H<sub>4</sub>)Br (2) in DMSO-*d*<sub>6</sub> (300 MHz).



Figure S12. COSY spectrum of (PTA-CH<sub>2</sub>-*m*-NO<sub>2</sub>-C<sub>6</sub>H<sub>4</sub>)Br (2) in DMSO-*d*<sub>6</sub> (300 MHz).



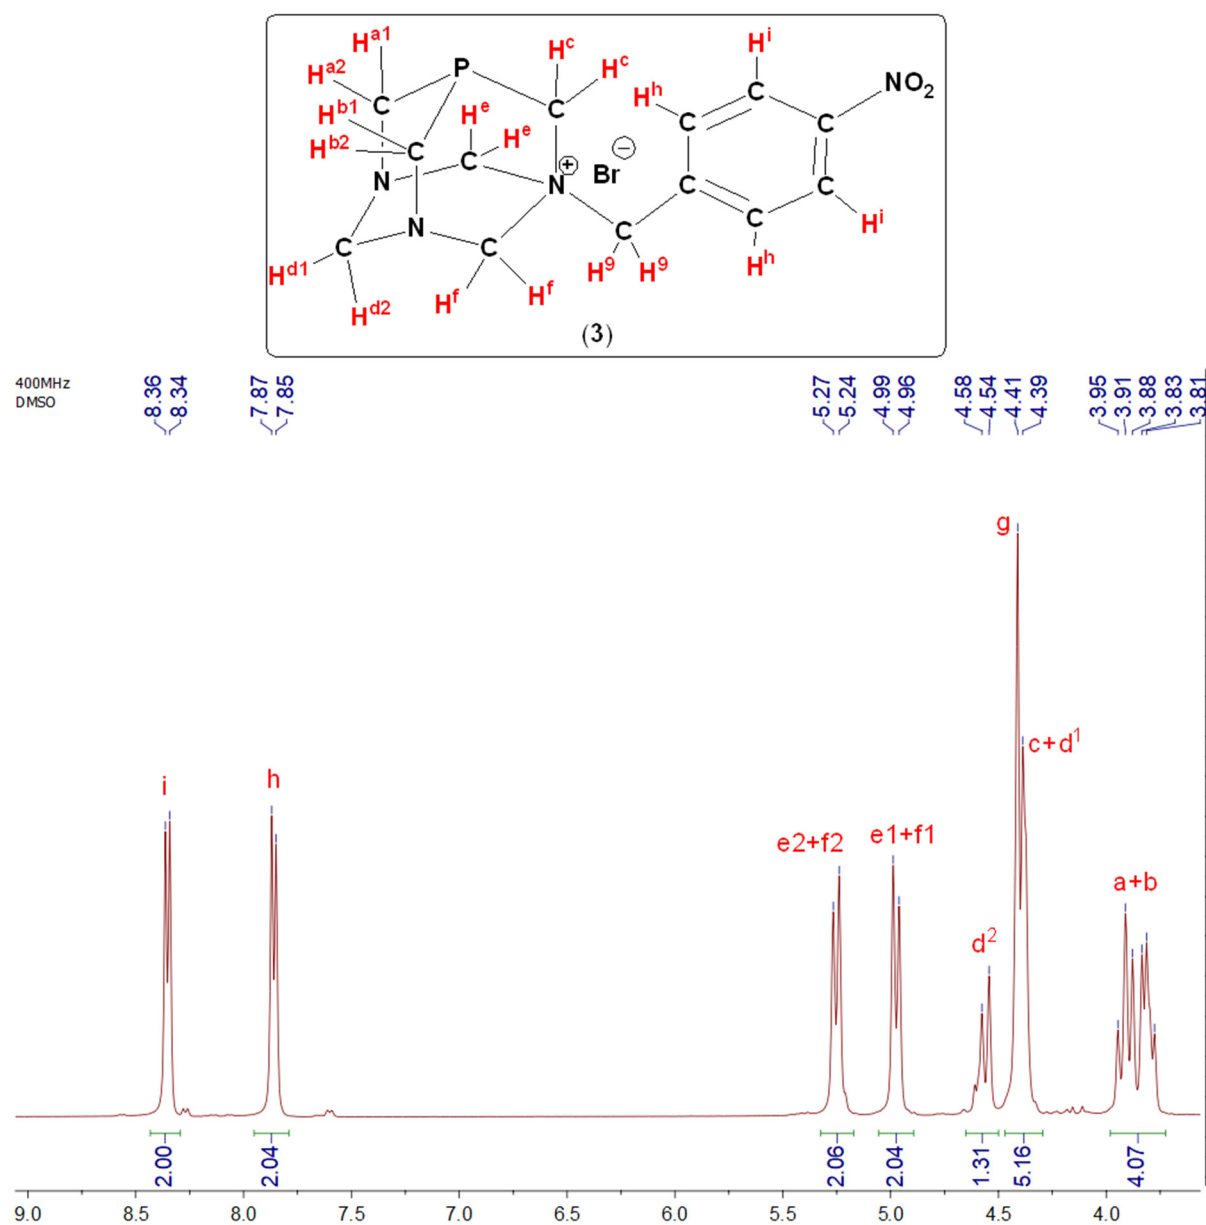

**Figure S13.** <sup>1</sup>H NMR spectrum of (PTA-CH<sub>2</sub>-p-NO<sub>2</sub>-C<sub>6</sub>H<sub>4</sub>)Br (3) in DMSO-*d*<sub>6</sub> (400 MHz).

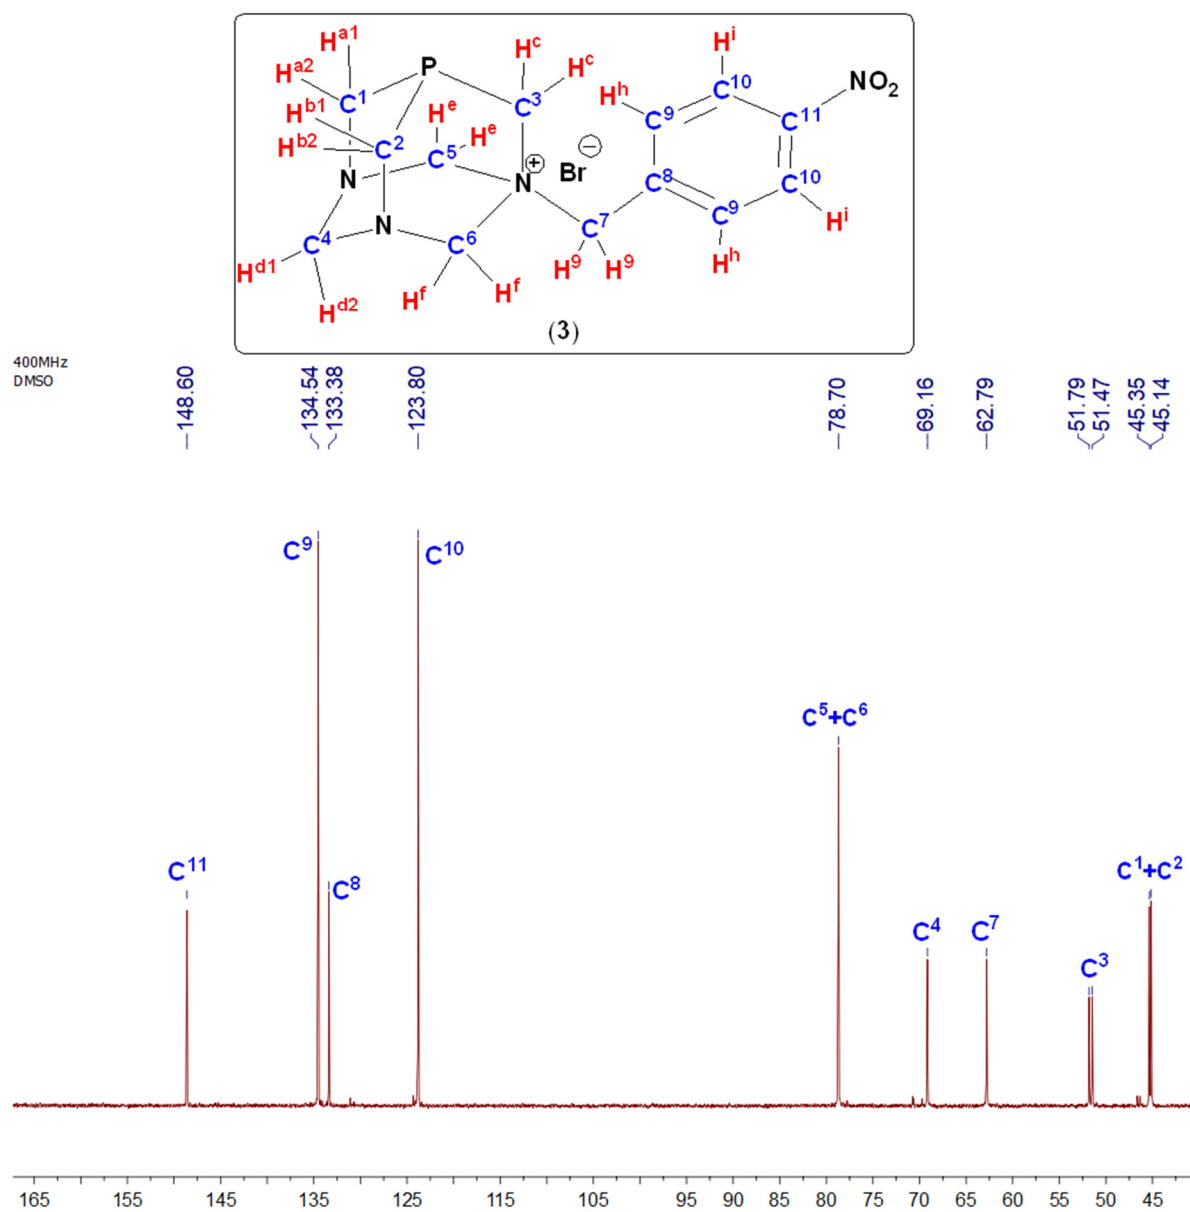

**Figure S14.**  $^{13}\text{C}$  NMR spectrum of (PTA-CH<sub>2</sub>-*p*-NO<sub>2</sub>-C<sub>6</sub>H<sub>4</sub>)Br (3) in DMSO-*d*<sub>6</sub> (400 MHz).

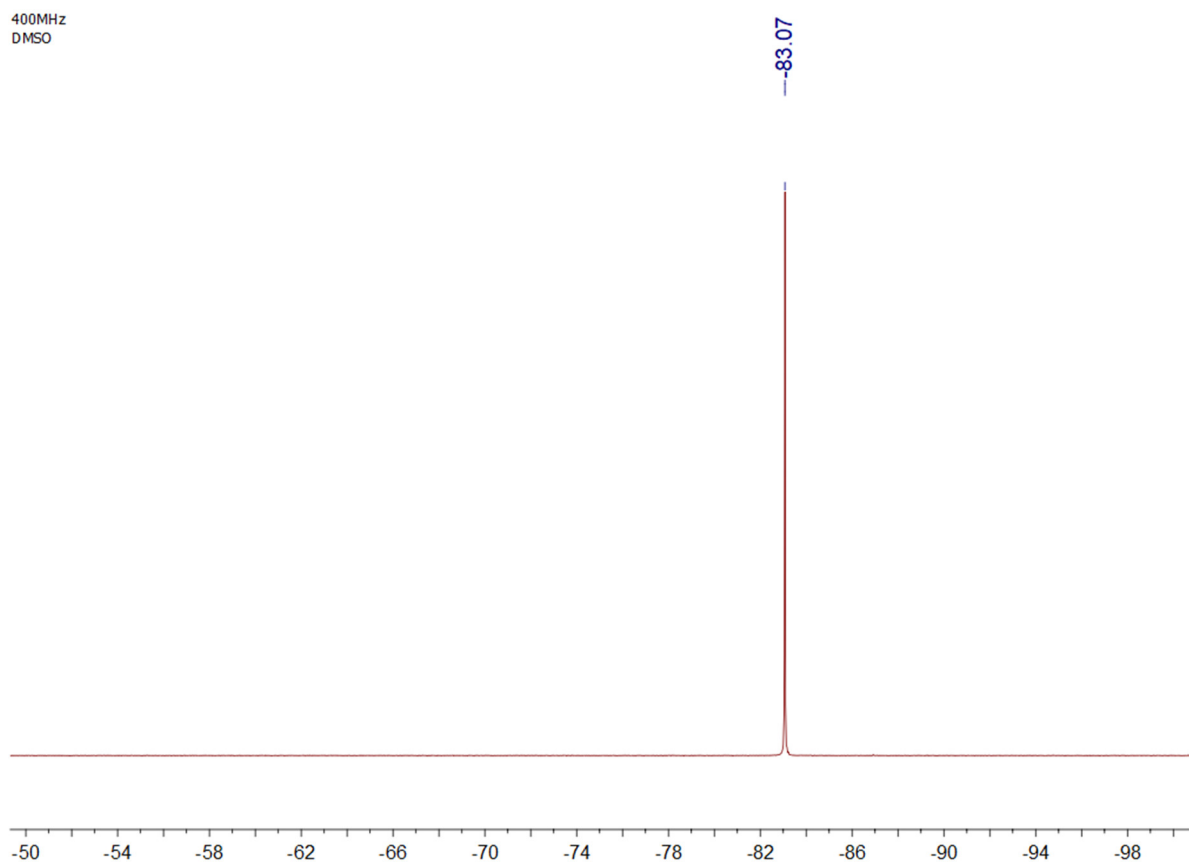

**Figure S15.**  $^{31}\text{P}$  NMR spectrum of (PTA-CH<sub>2</sub>-*p*-NO<sub>2</sub>-C<sub>6</sub>H<sub>4</sub>)Br (**3**) in DMSO-*d*<sub>6</sub> (400 MHz).

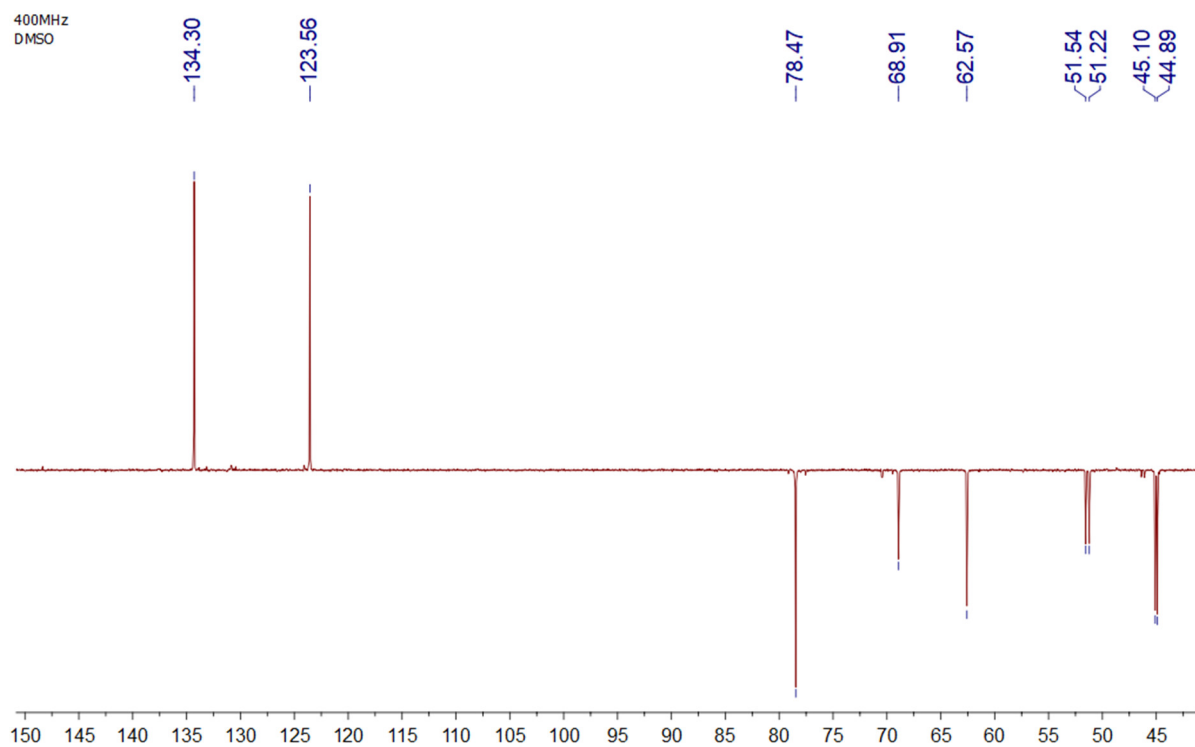

**Figure S16.** DEPT NMR spectrum of (PTA-CH<sub>2</sub>-*p*-NO<sub>2</sub>-C<sub>6</sub>H<sub>4</sub>)Br (**3**) in DMSO-*d*<sub>6</sub> (400 MHz).

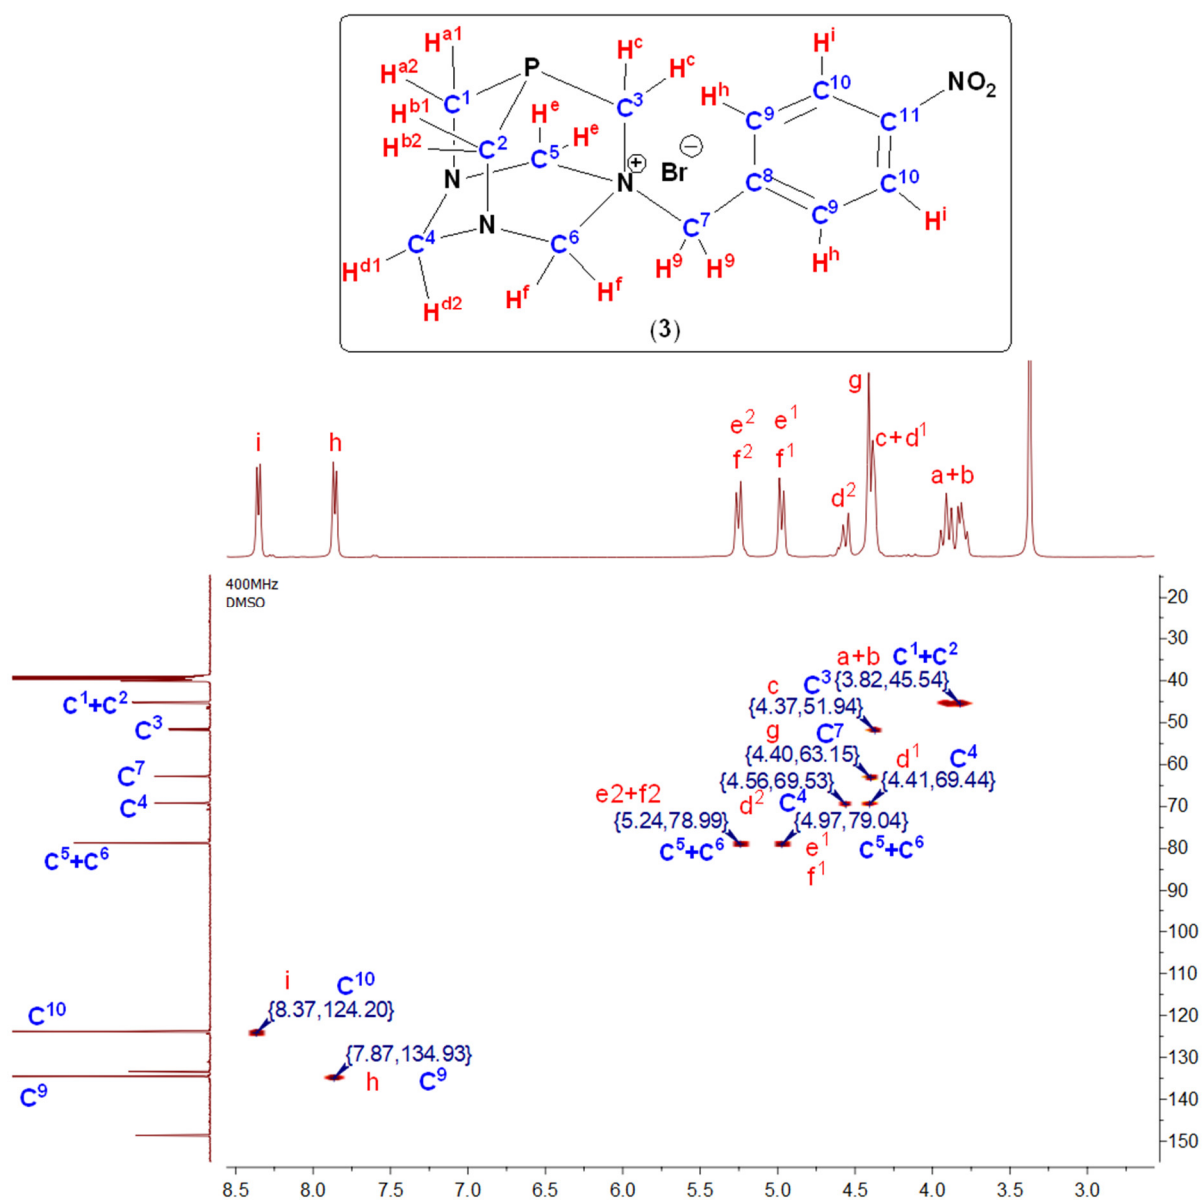

**Figure S17.** HSQC spectrum of (PTA-CH<sub>2</sub>-*p*-NO<sub>2</sub>-C<sub>6</sub>H<sub>4</sub>)Br (3) in DMSO-*d*<sub>6</sub> (400 MHz).

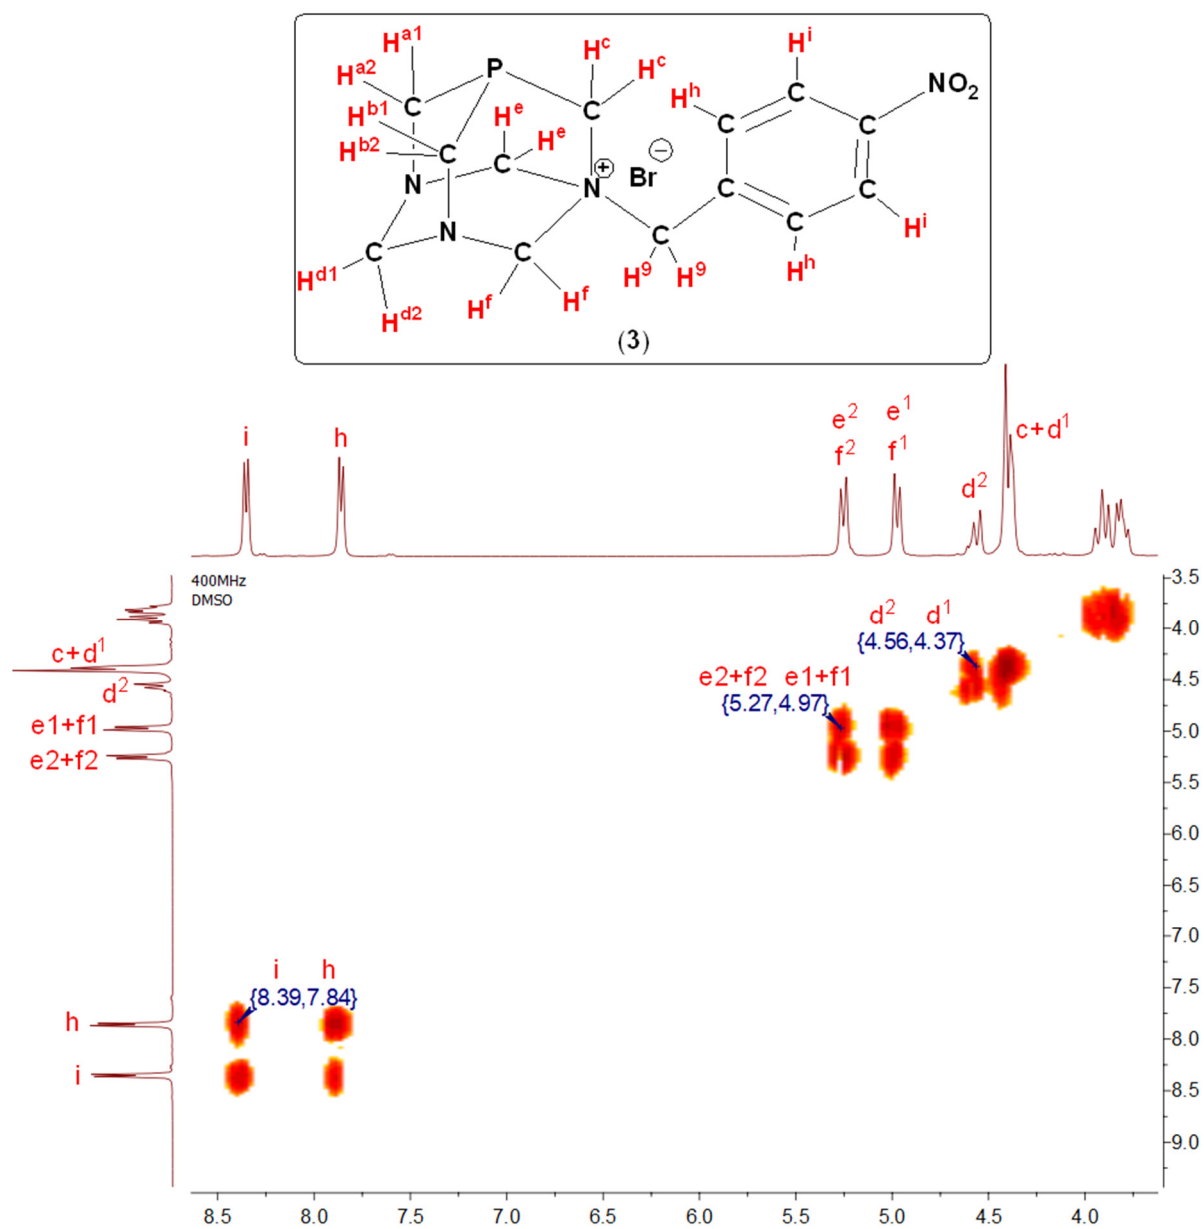

**Figure S18.** COSY spectrum of (PTA-CH<sub>2</sub>-p-NO<sub>2</sub>-C<sub>6</sub>H<sub>4</sub>)Br (3) in DMSO-*d*<sub>6</sub> (400 MHz).

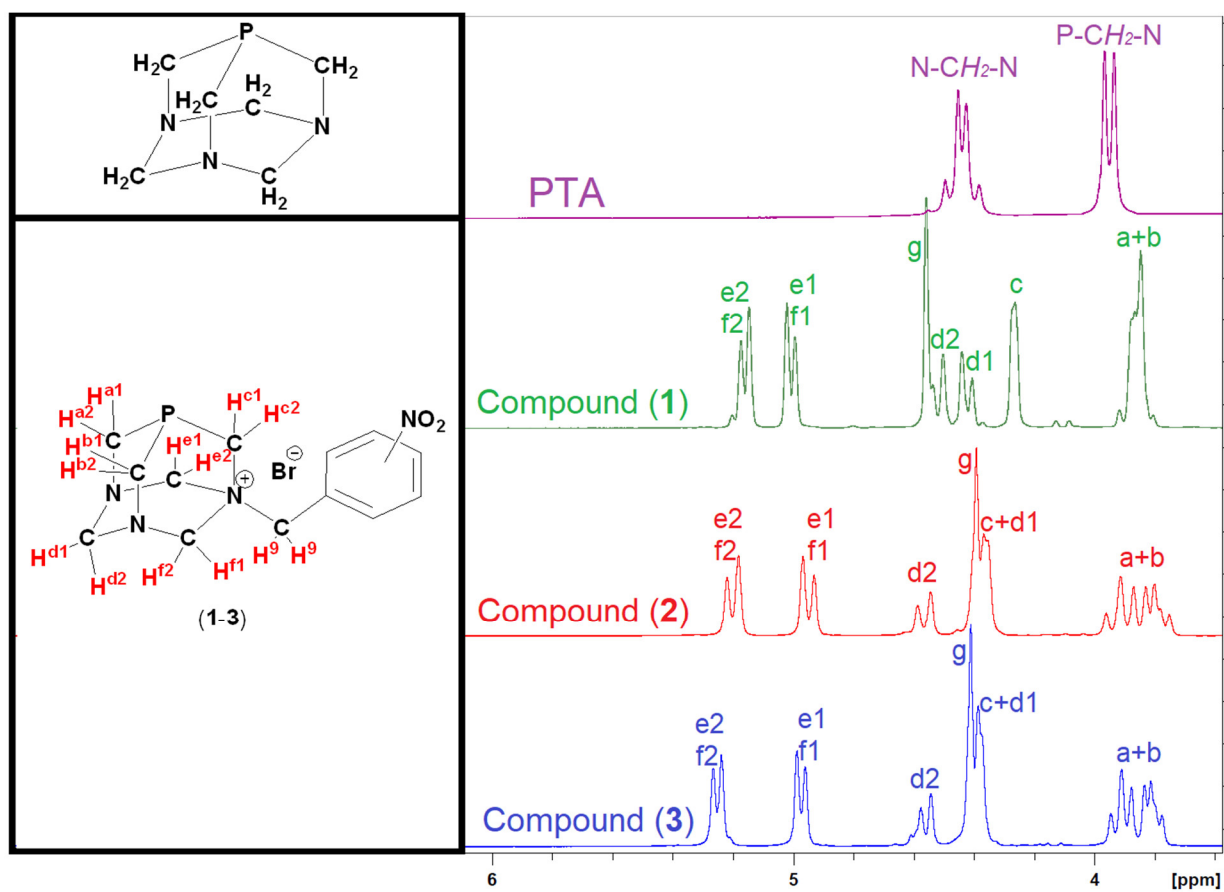

Figure S19.  $^1\text{H}$  NMR spectra of compounds 1-3 and their PTA precursor in  $\text{DMSO-d}_6$ .

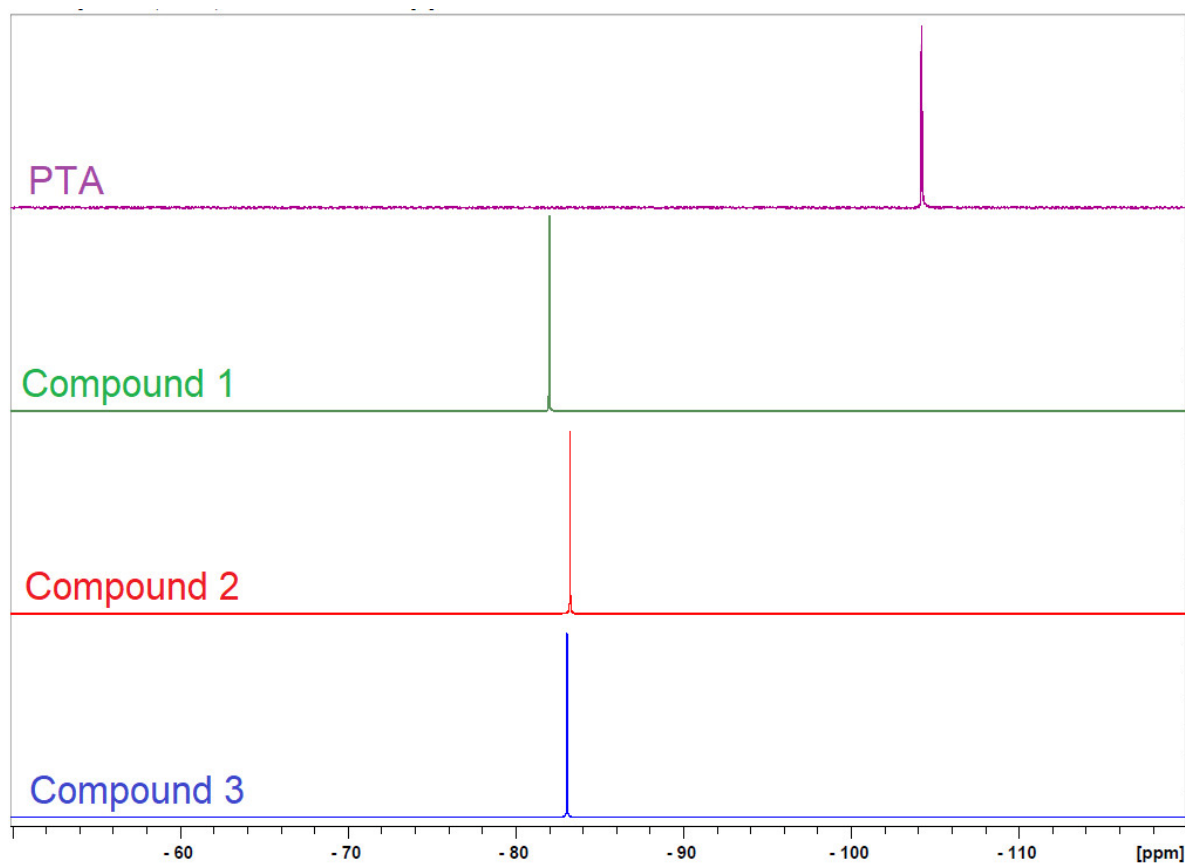

**Figure S20.**  $^{31}\text{P}\{^1\text{H}\}$  NMR spectra of PTA and compounds (1-3) in  $\text{DMSO}-d_6$ .





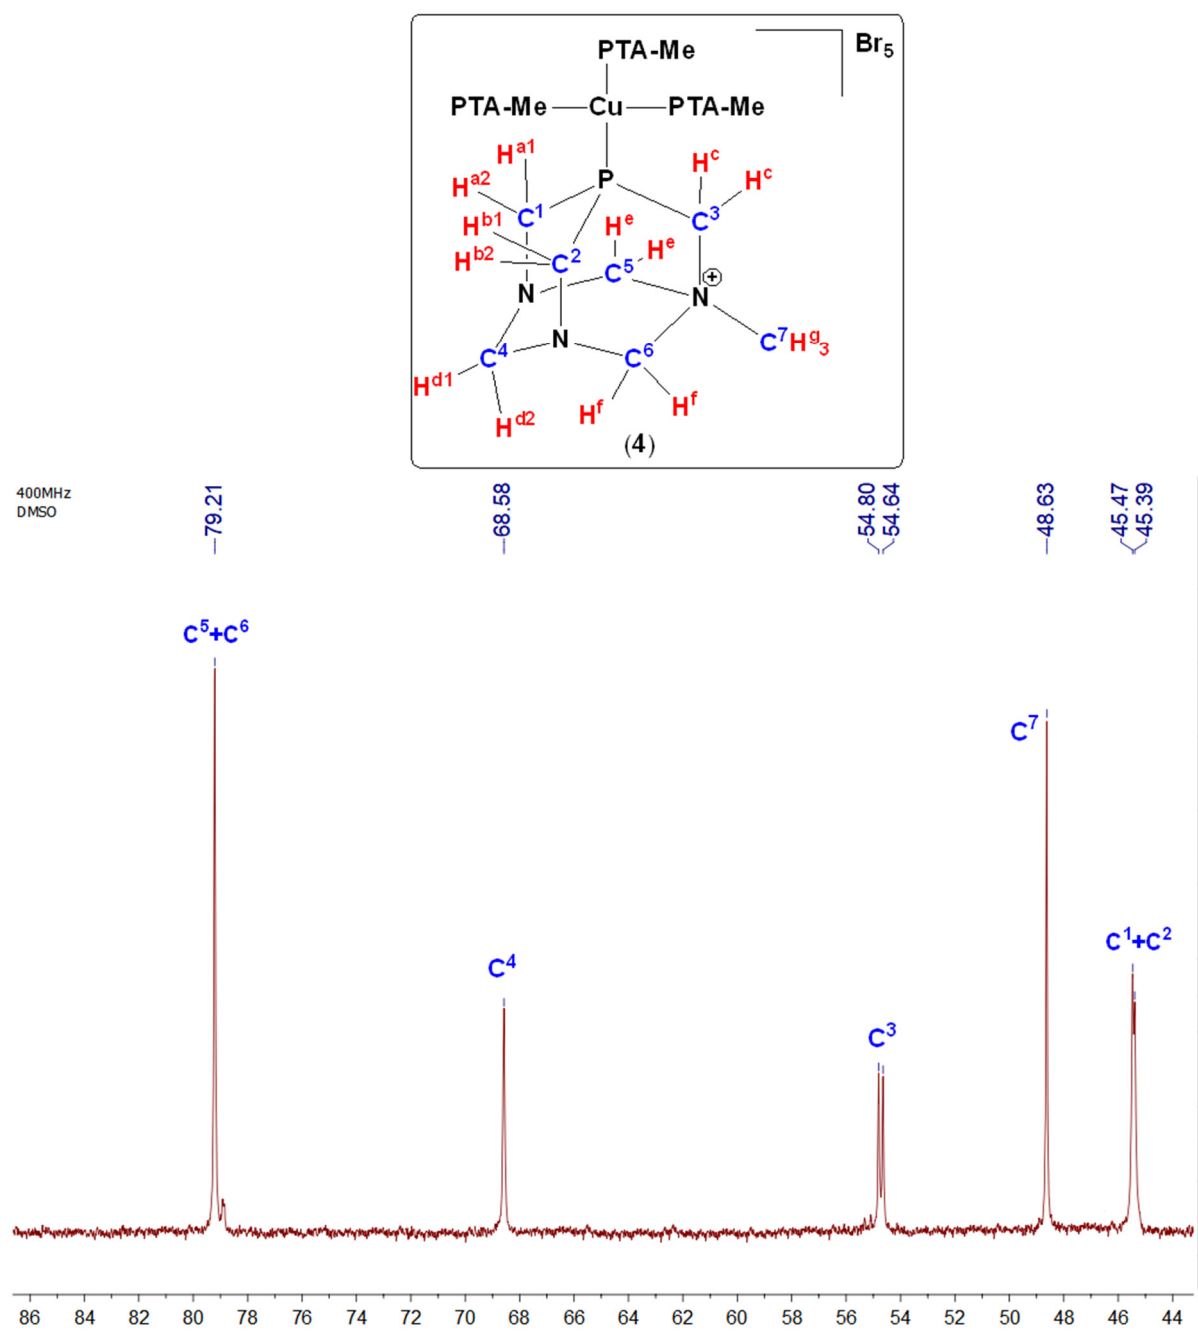

**Figure S22.**  $^{13}\text{C}$  NMR spectrum of  $[\text{Cu}(\text{PTA-Me})]\cdot\text{Br}_5$  (4) in  $\text{DMSO-}d_6$  (400 MHz).

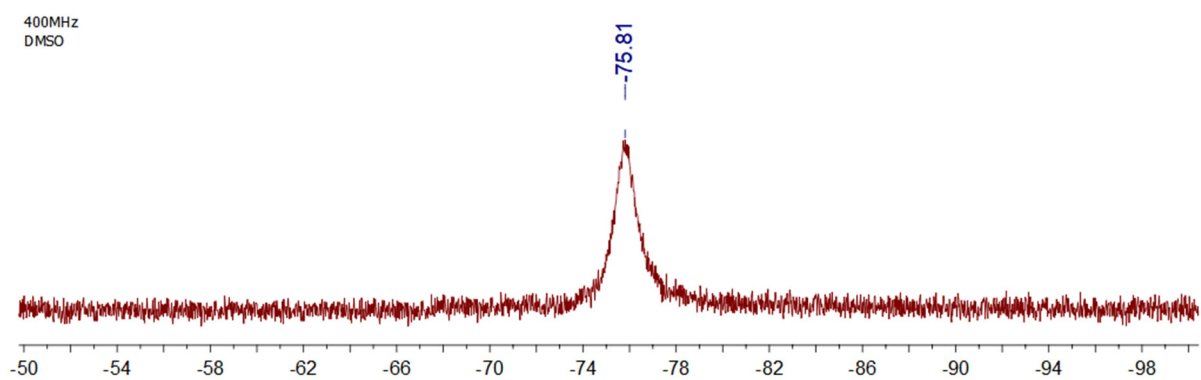

**Figure S23.**  $^{31}\text{P}$  NMR spectrum of  $[\text{Cu}(\text{PTA-Me})\cdot\text{Br}_5$  (**4**) in  $\text{DMSO-}d_6$  (400 MHz).

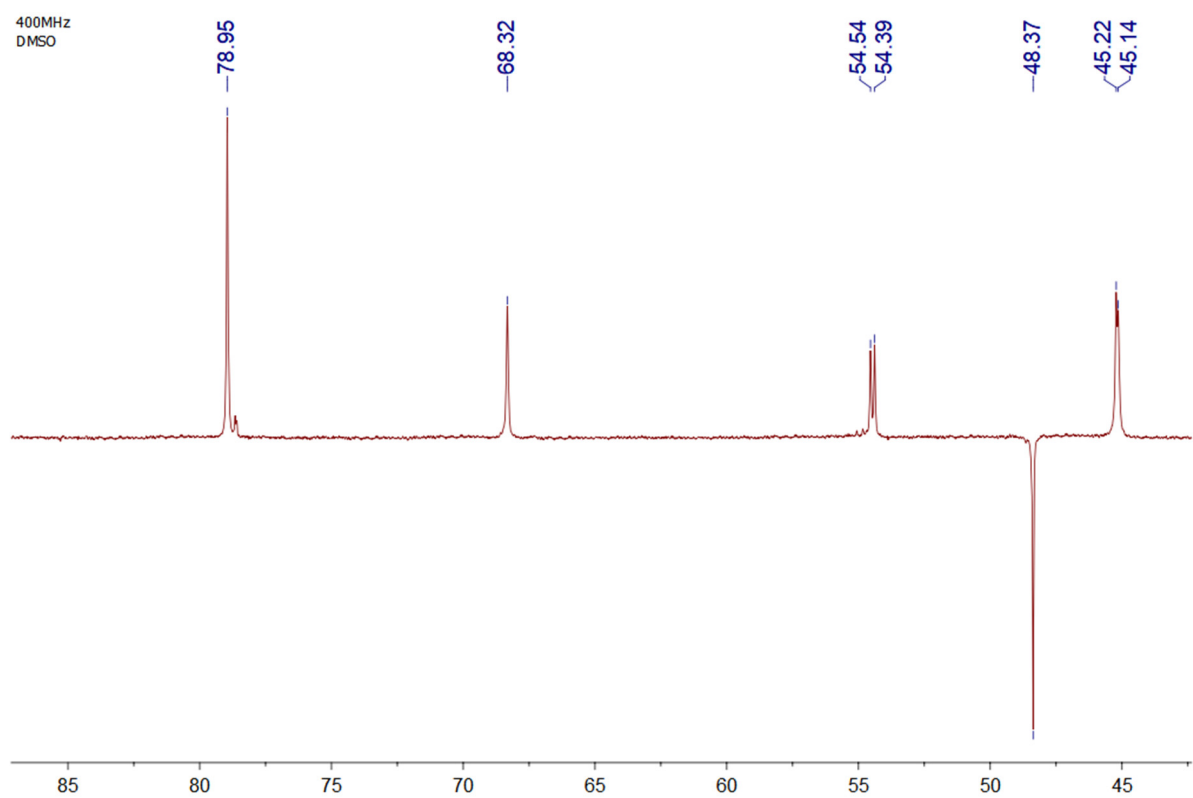

**Figure S24.** DEPT NMR spectrum of  $[\text{Cu}(\text{PTA-Me})\cdot\text{Br}_5$  (**4**) in  $\text{DMSO-}d_6$  (400 MHz).

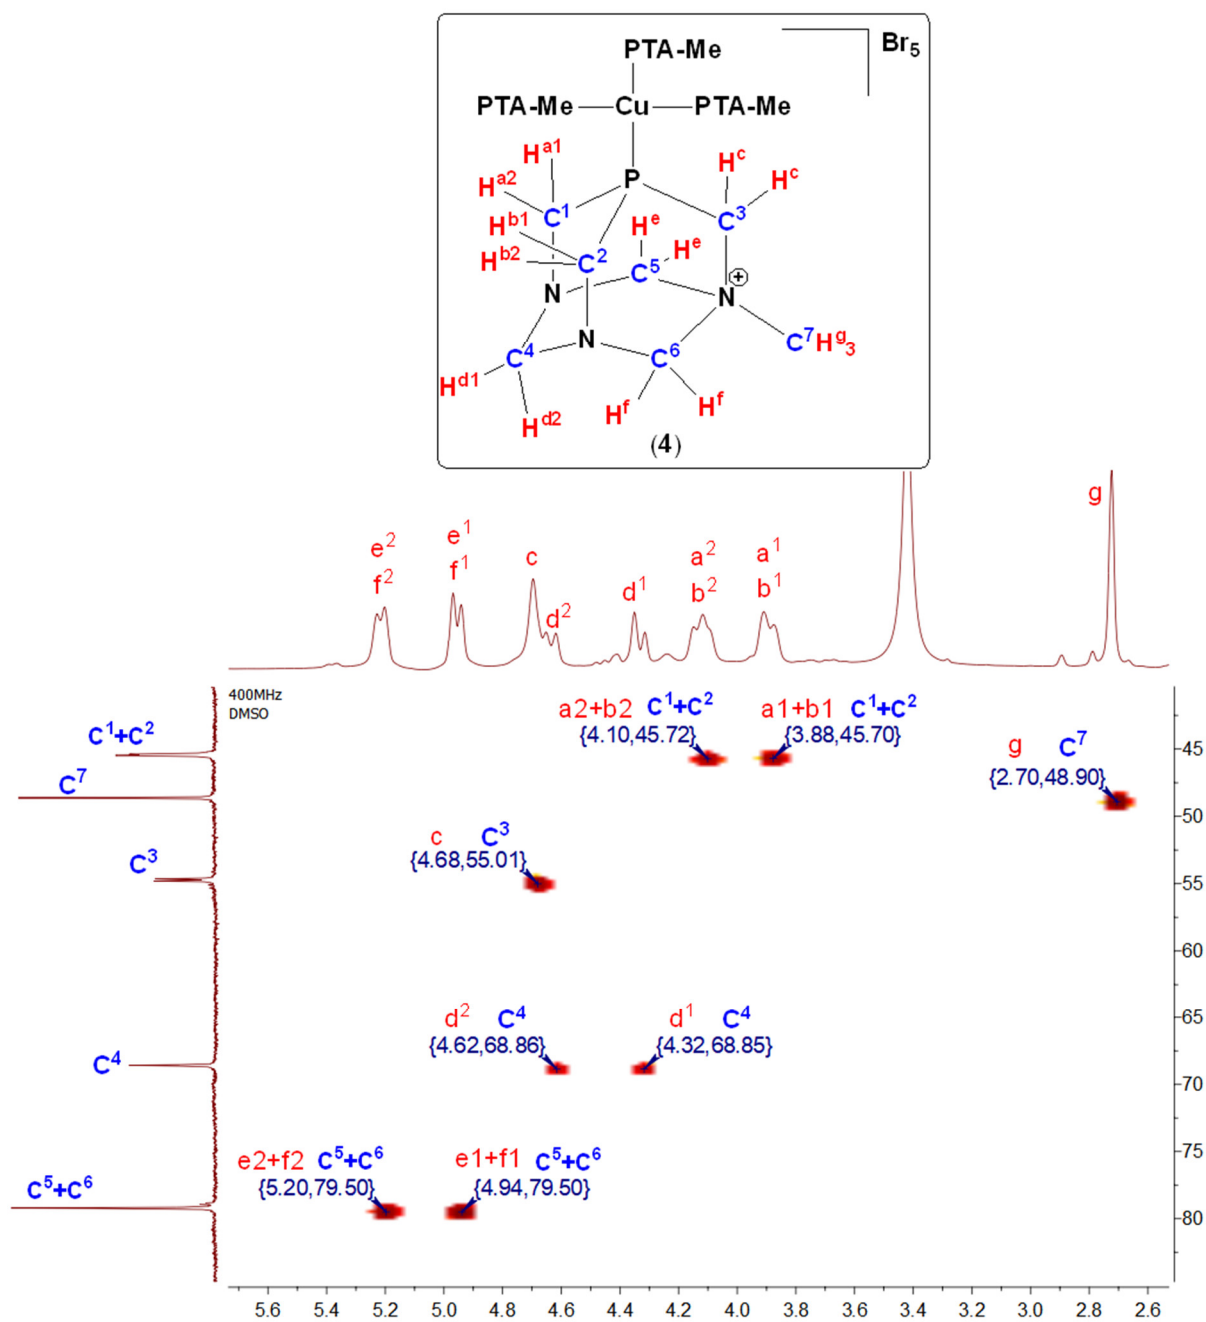

Figure S25. HSQC spectrum of  $[Cu(PTA-Me)]Br_5$  (4) in  $DMSO-d_6$  (400 MHz).

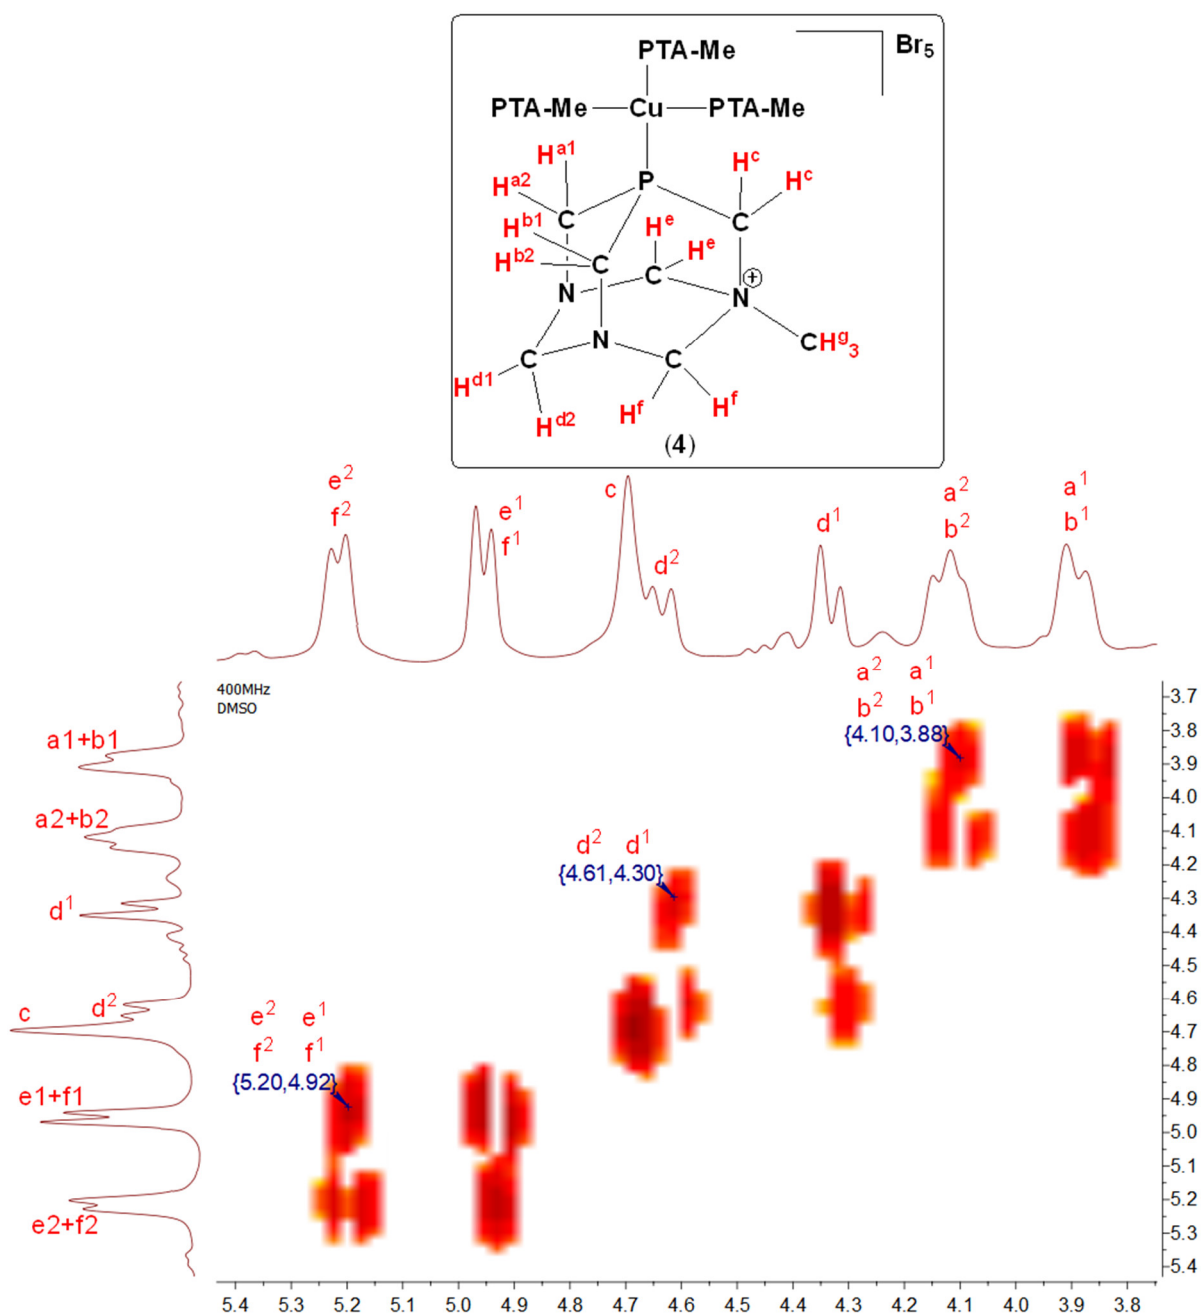

**Figure S26.** COSY spectrum of  $[\text{Cu}(\text{PTA-Me})]\cdot\text{Br}_5$  (4) in DMSO- $d_6$  (400 MHz).

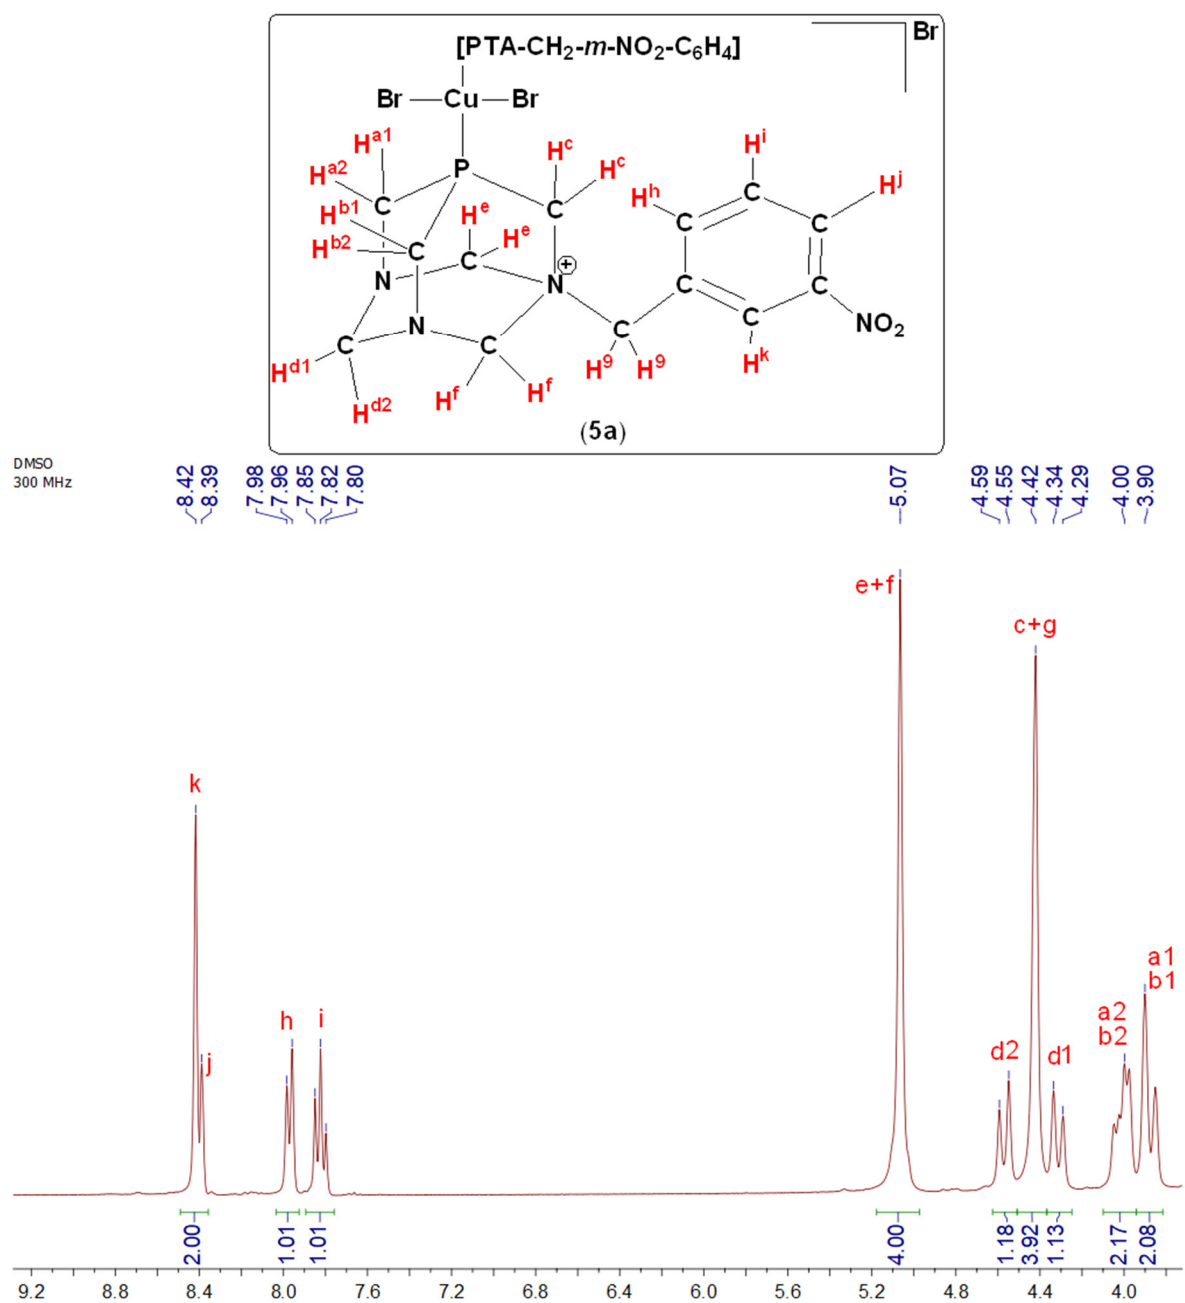

**Figure S27.** <sup>1</sup>H NMR spectrum of [CuBr<sub>2</sub>(PTA-CH<sub>2</sub>-*m*-NO<sub>2</sub>-C<sub>6</sub>H<sub>4</sub>)<sub>2</sub>]<sup>+</sup>Br<sup>-</sup> (5a) in DMSO-*d*<sub>6</sub> (300 MHz).

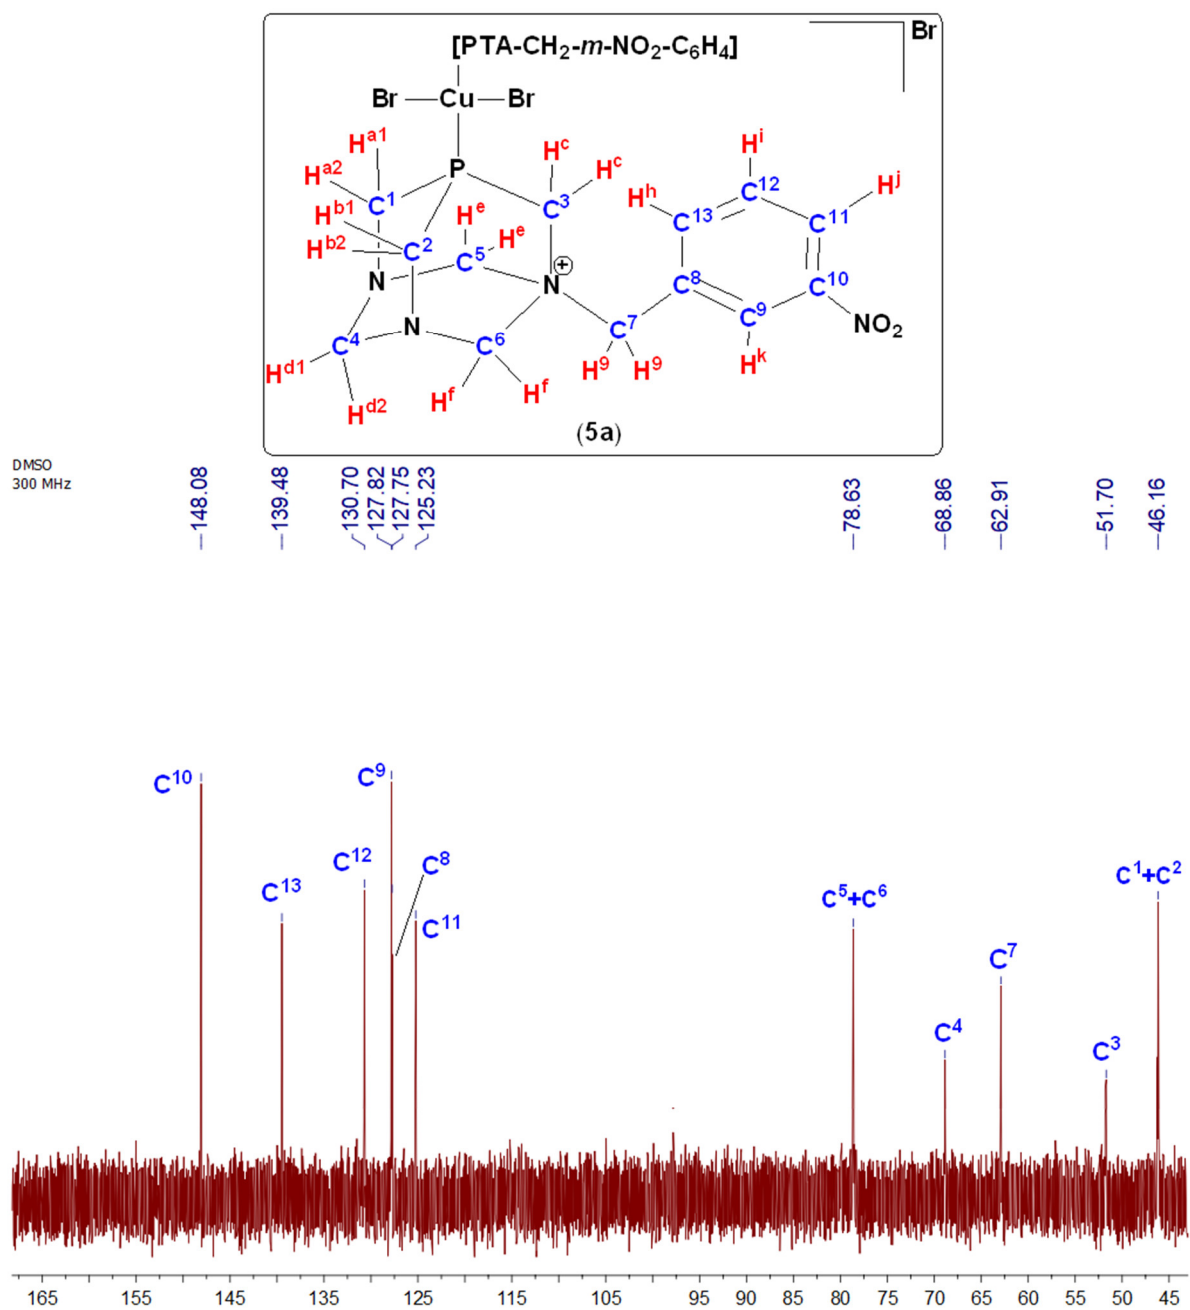

**Figure S28.** <sup>13</sup>C NMR spectrum of [CuBr<sub>2</sub>(PTA-CH<sub>2</sub>-*m*-NO<sub>2</sub>-C<sub>6</sub>H<sub>4</sub>)<sub>2</sub>] $\cdot$ Br (5a) in DMSO-*d*<sub>6</sub> (300 MHz).

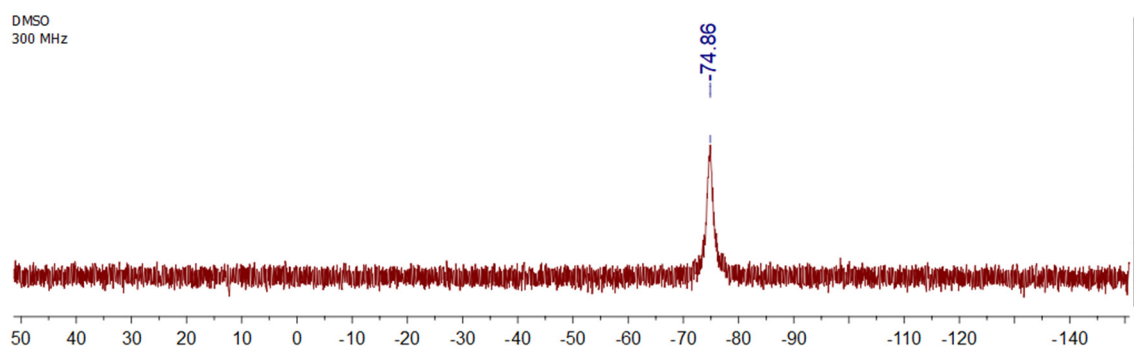

**Figure S29.**  $^{31}\text{P}$  NMR spectrum of  $[\text{CuBr}_2(\text{PTA-CH}_2\text{-}m\text{-NO}_2\text{-C}_6\text{H}_4)_2]\cdot\text{Br}$  (**5a**) in  $\text{DMSO-}d_6$  (300 MHz).

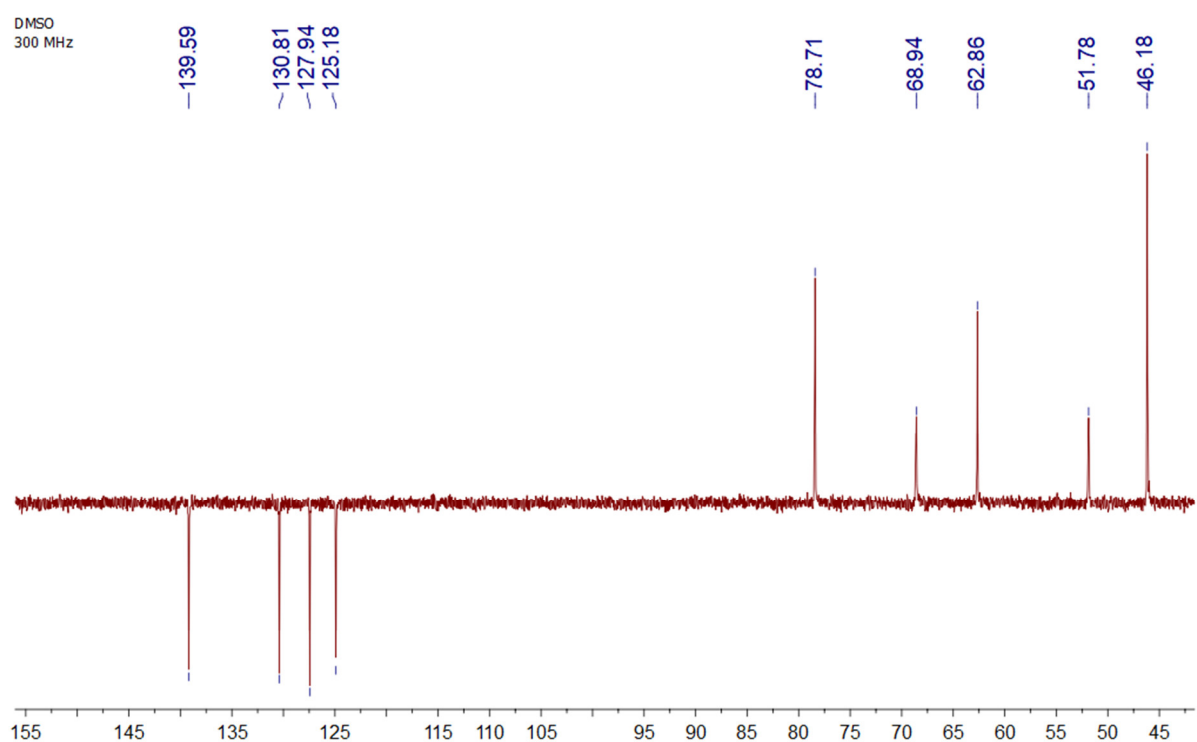

**Figure S30.** DEPT NMR spectrum of  $[\text{CuBr}_2(\text{PTA-CH}_2\text{-}m\text{-NO}_2\text{-C}_6\text{H}_4)_2]\cdot\text{Br}$  (**5a**) in  $\text{DMSO-}d_6$  (300 MHz).

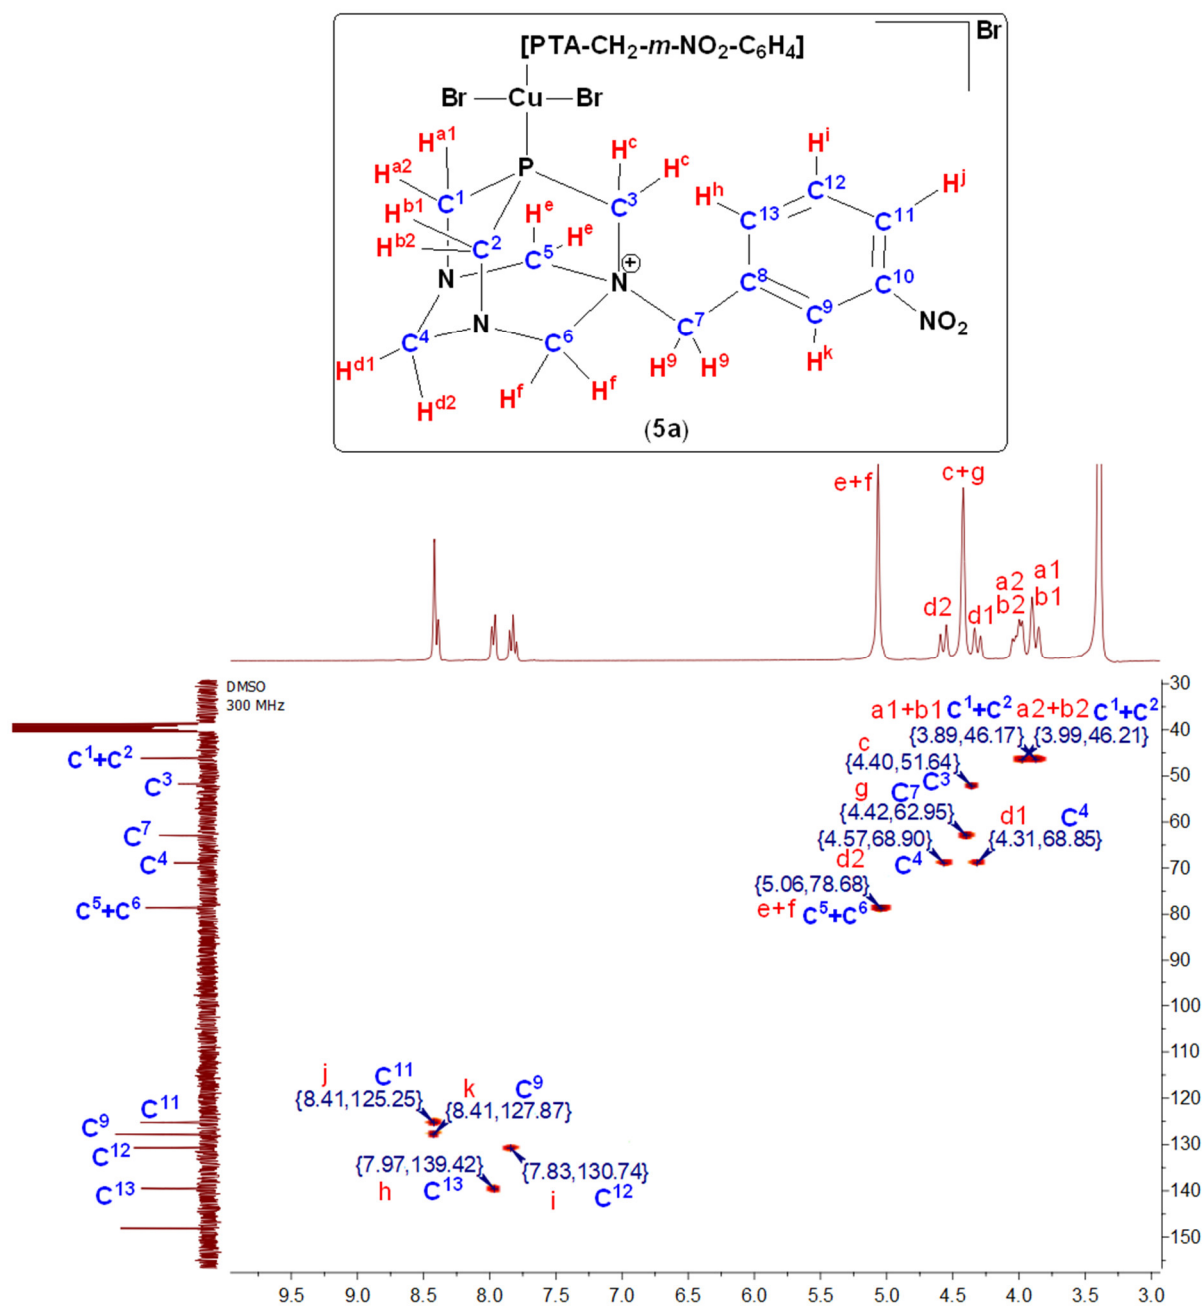

**Figure S31.** HSQC spectrum of  $[\text{CuBr}_2(\text{PTA-CH}_2\text{-}m\text{-NO}_2\text{-C}_6\text{H}_4)_2] \cdot \text{Br}$  (**5a**) in DMSO-*d*<sub>6</sub> (300 MHz).



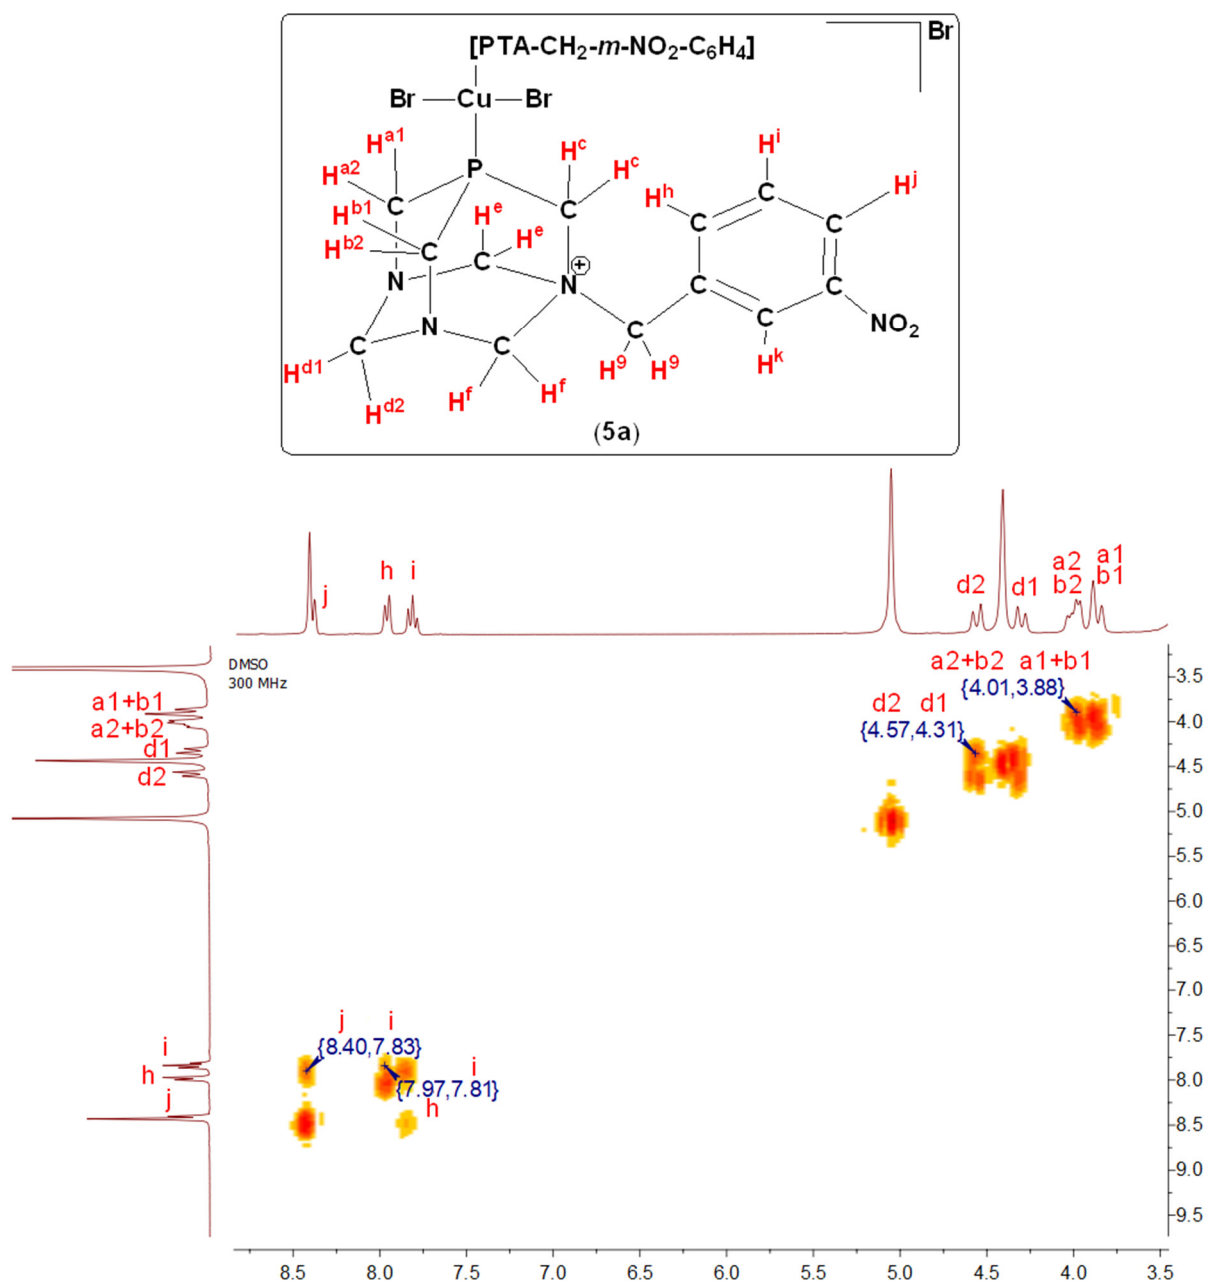

**Figure S32.** COSY spectrum of  $[\text{CuBr}_2(\text{PTA-CH}_2\text{-}m\text{-NO}_2\text{-C}_6\text{H}_4)_2]\cdot\text{Br}$  (**5a**) in  $\text{DMSO-}d_6$  (300 MHz).

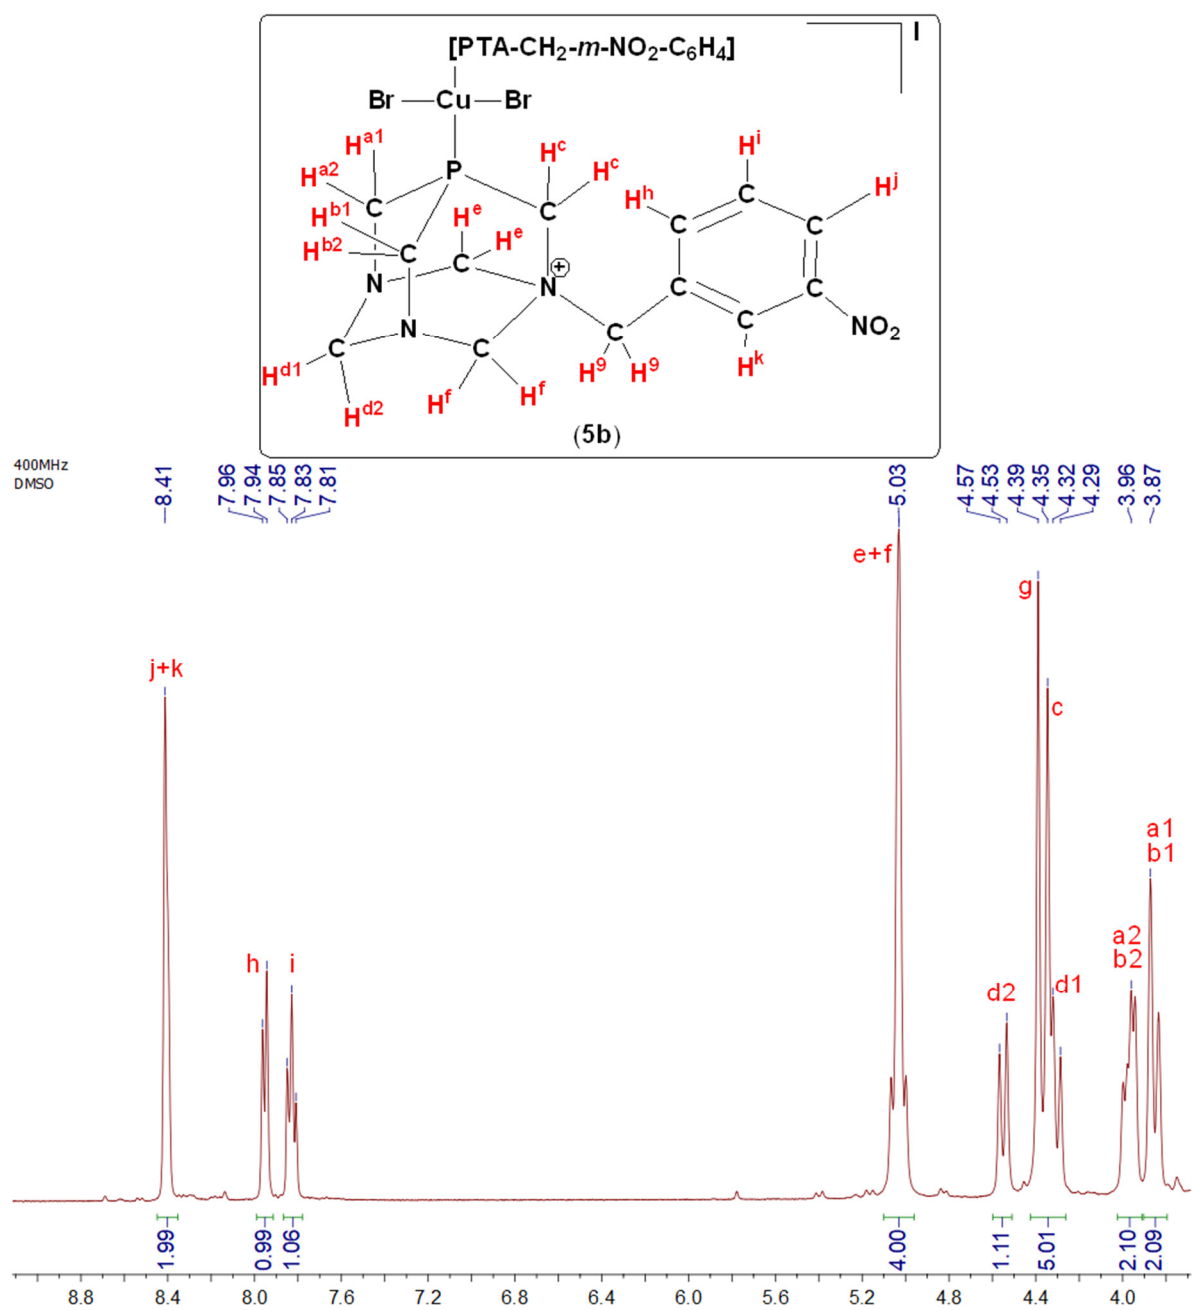

**Figure S33.** <sup>1</sup>H NMR spectrum of [CuBr<sub>2</sub>(PTA-CH<sub>2</sub>-*m*-NO<sub>2</sub>-C<sub>6</sub>H<sub>4</sub>)<sub>2</sub>]**·I** (**5b**) in DMSO-*d*<sub>6</sub> (400 MHz).

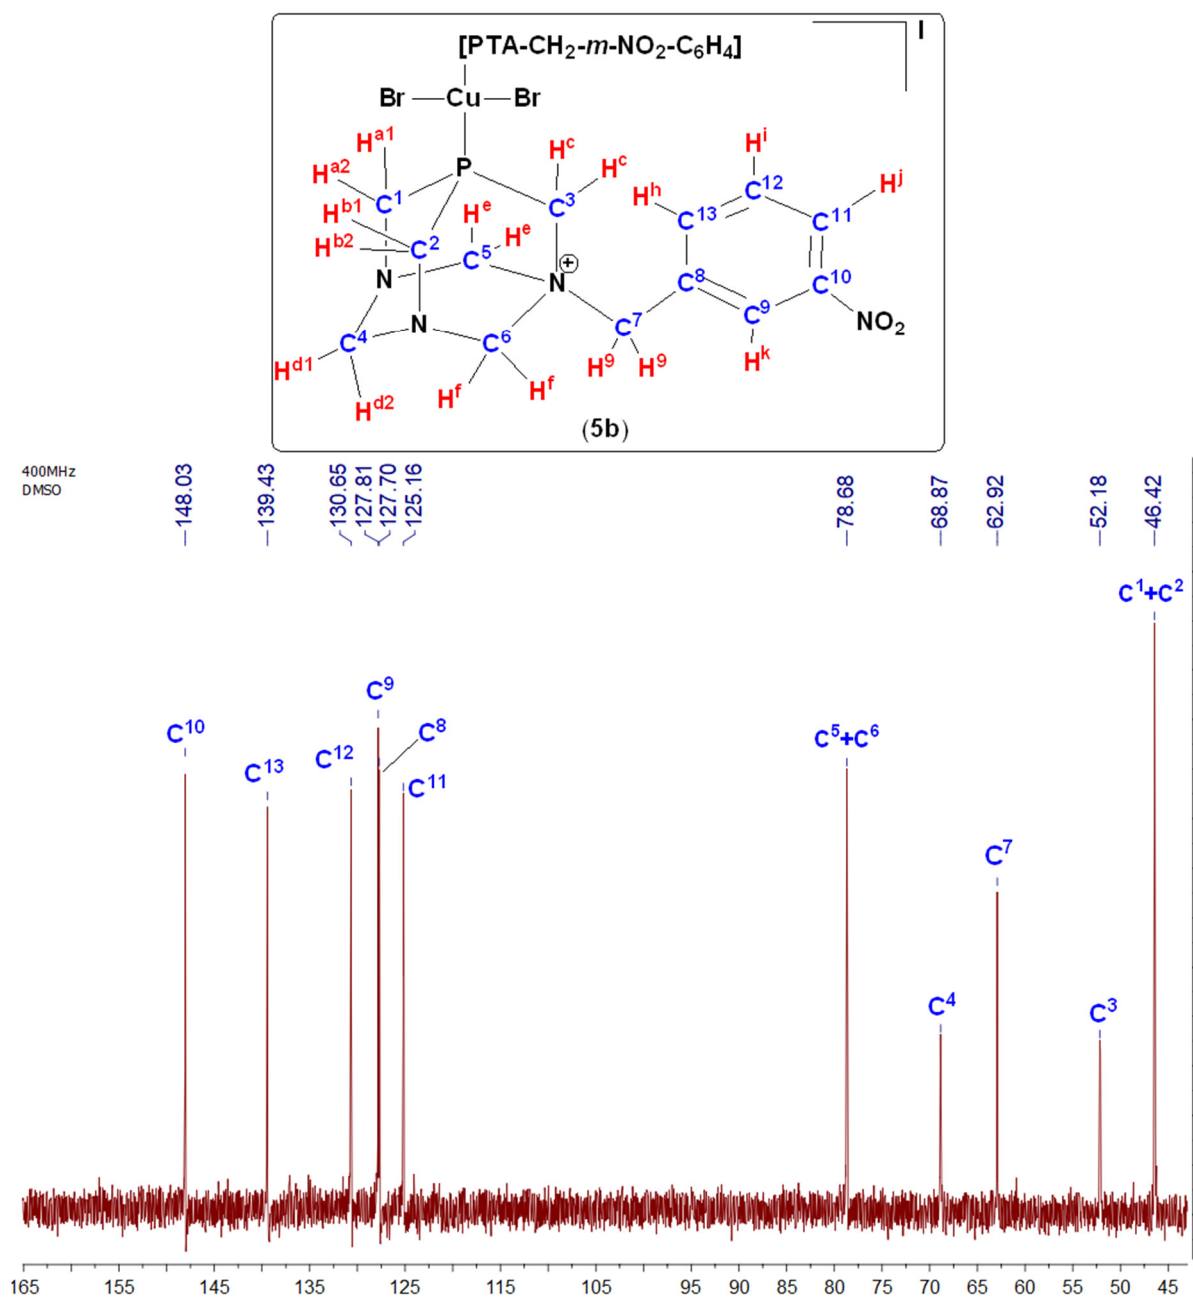

**Figure S34.**  $^{13}\text{C}$  NMR spectrum of  $[\text{CuBr}_2(\text{PTA-CH}_2\text{-}m\text{-NO}_2\text{-C}_6\text{H}_4)_2]\cdot\text{I}$  (**5b**) in  $\text{DMSO-}d_6$  (400 MHz).

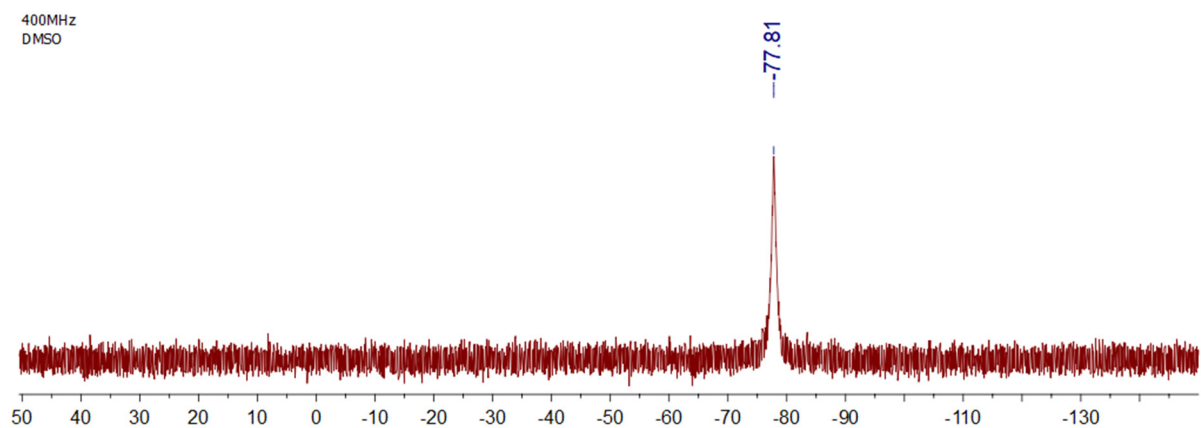

**Figure S35.**  $^{31}\text{P}$  NMR spectrum of  $[\text{CuBr}_2(\text{PTA-CH}_2\text{-}m\text{-NO}_2\text{-C}_6\text{H}_4)_2]\cdot\text{I}$  (**5b**) in  $\text{DMSO-}d_6$  (400 MHz).

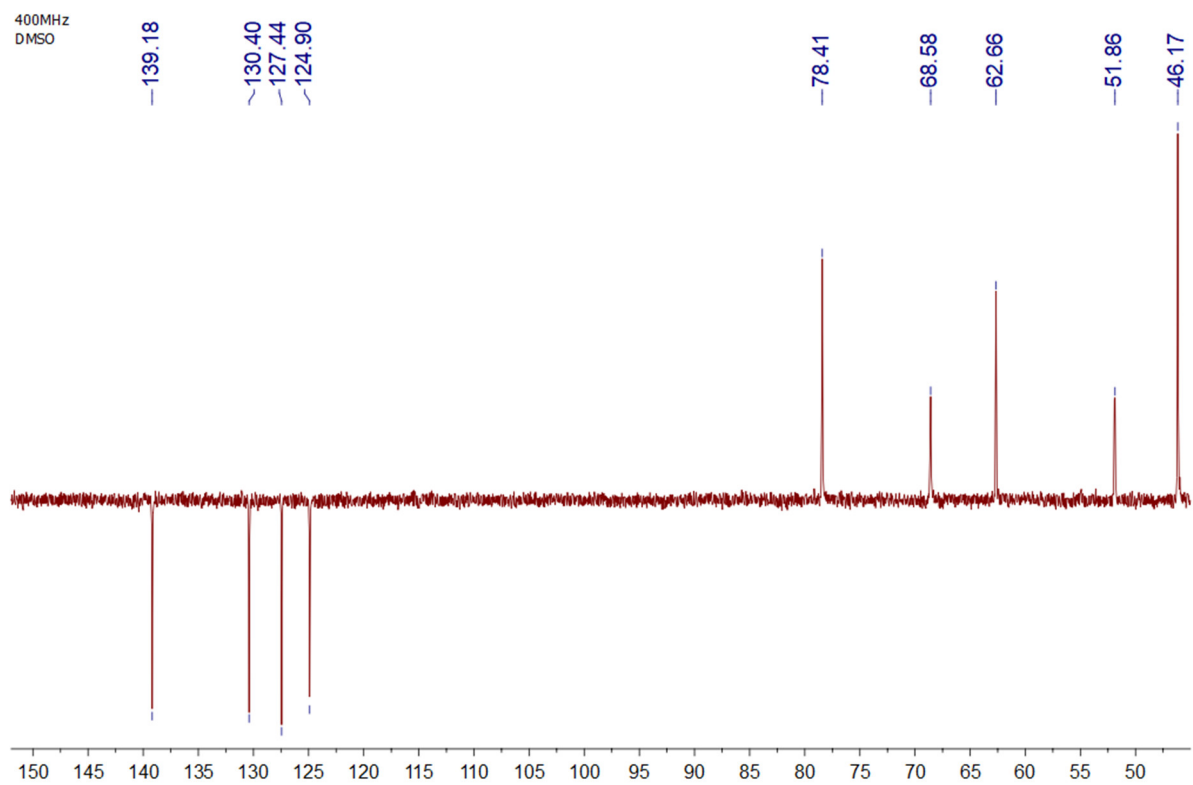

**Figure S36.** DEPT NMR spectrum of  $[\text{CuBr}_2(\text{PTA-CH}_2\text{-}m\text{-NO}_2\text{-C}_6\text{H}_4)_2]\cdot\text{I}$  (**5b**) in  $\text{DMSO-}d_6$  (400 MHz).

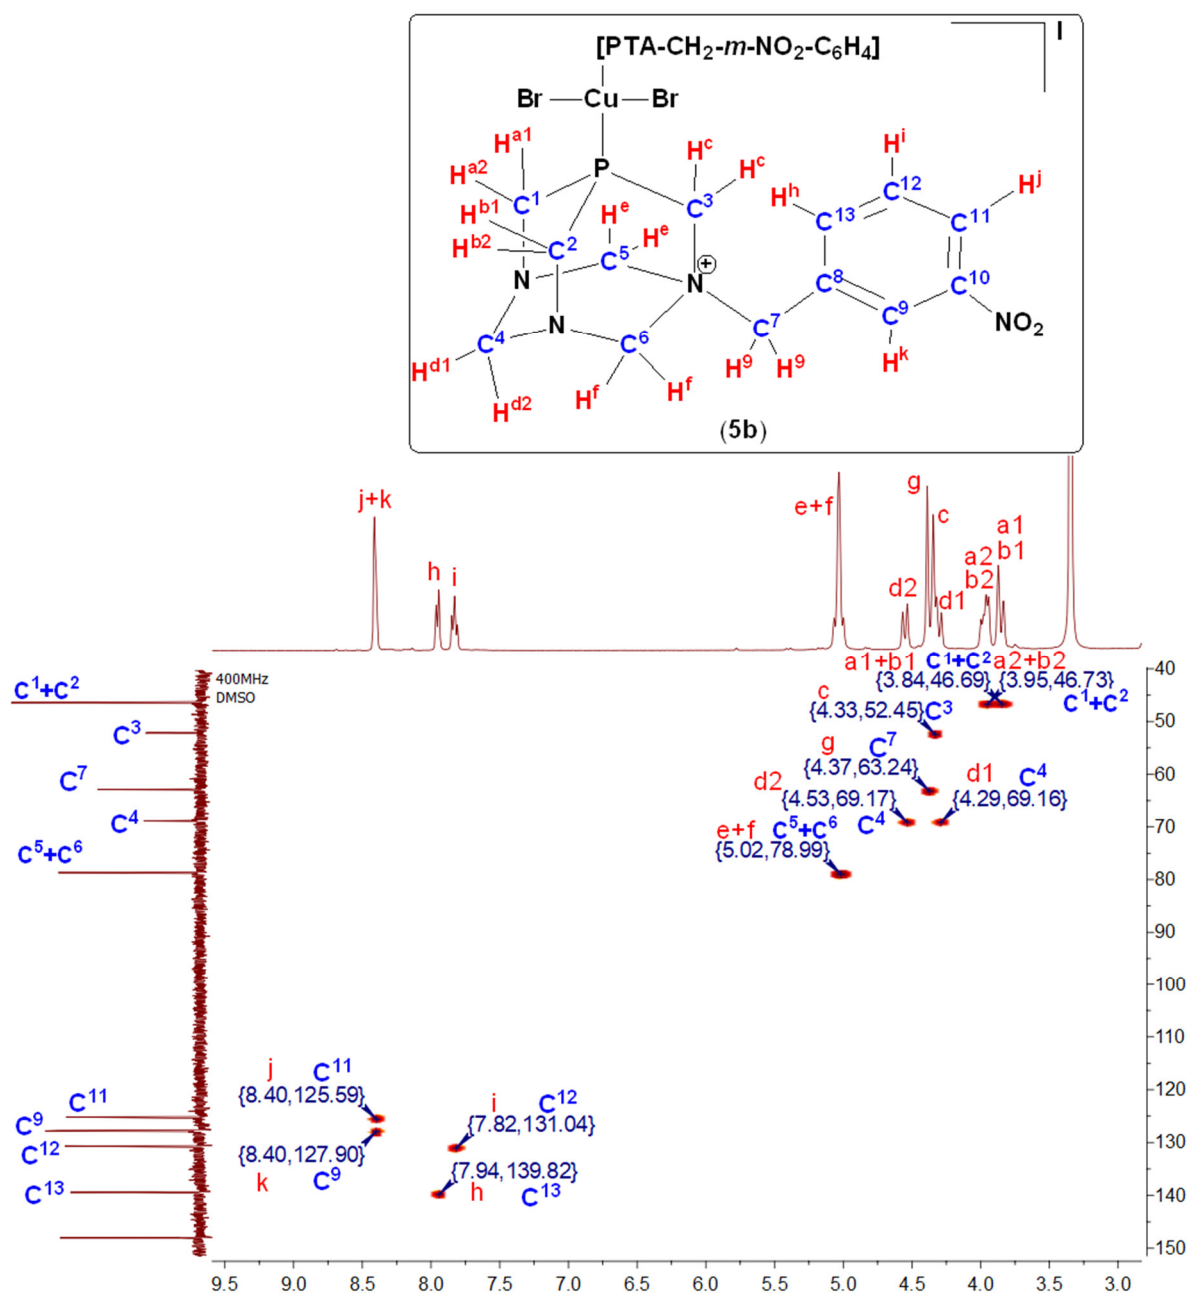

Figure S37. HSQC spectrum of  $[\text{CuBr}_2(\text{PTA-CH}_2\text{-}m\text{-NO}_2\text{-C}_6\text{H}_4)_2] \cdot \text{I}$  (**5b**) in  $\text{DMSO-}d_6$  (400 MHz).

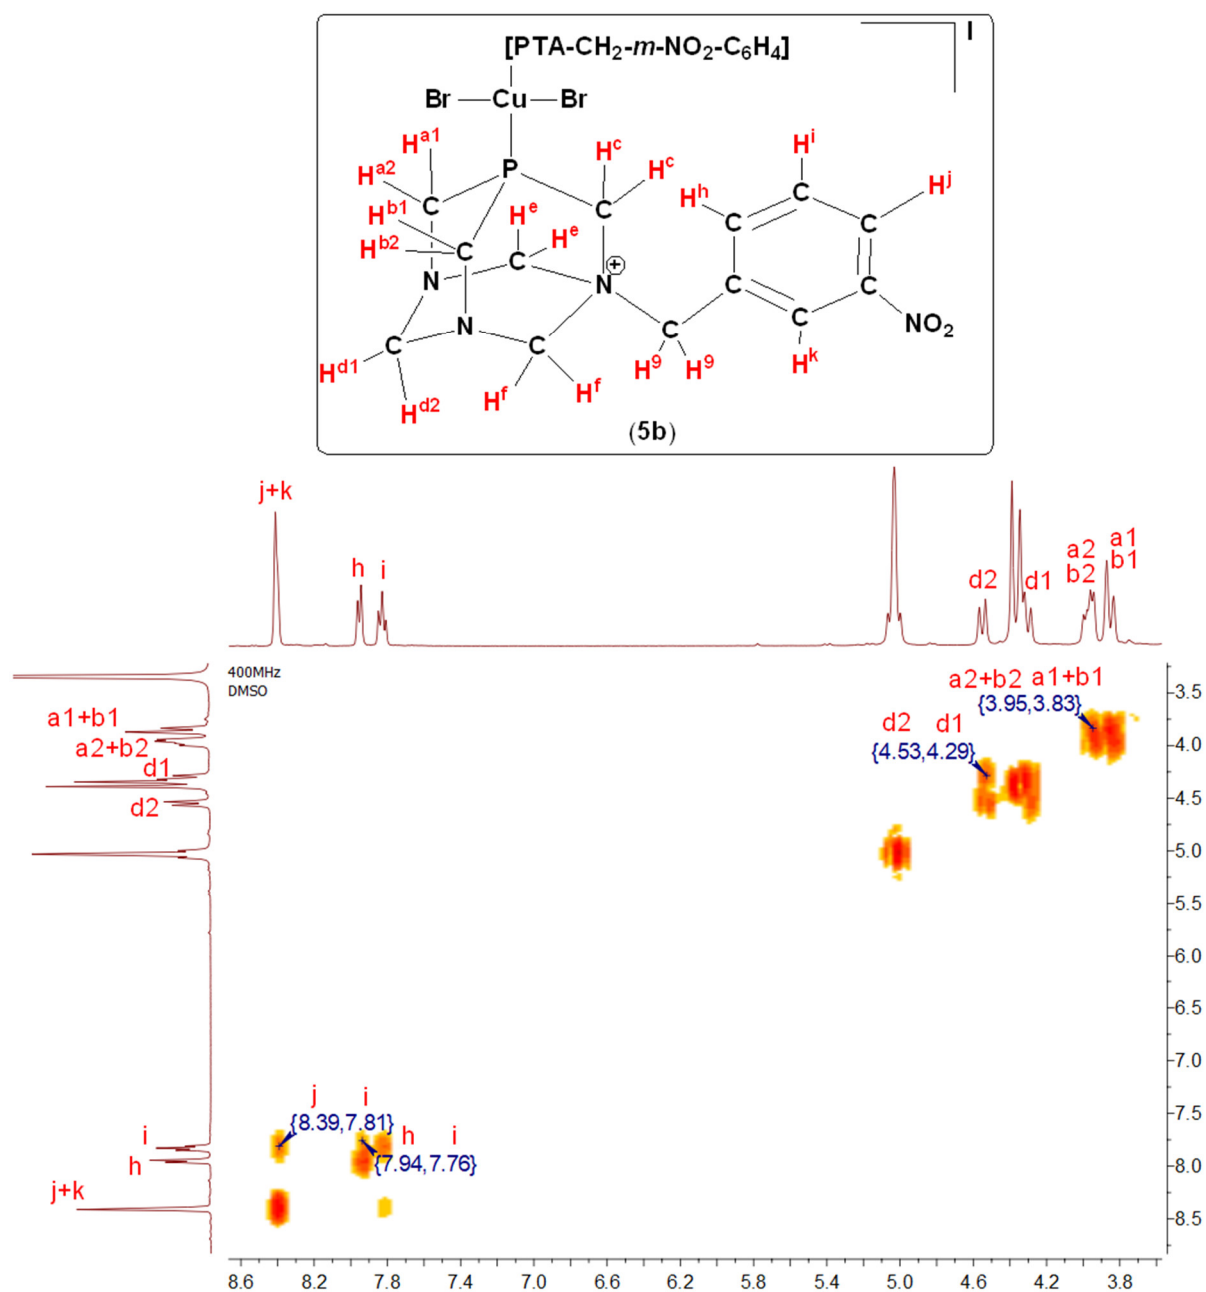

**Figure S38.** COSY spectrum of  $[\text{CuBr}_2(\text{PTA-CH}_2\text{-}m\text{-NO}_2\text{-C}_6\text{H}_4)_2]\cdot\text{I}$  (**5b**) in DMSO- $d_6$  (400 MHz).

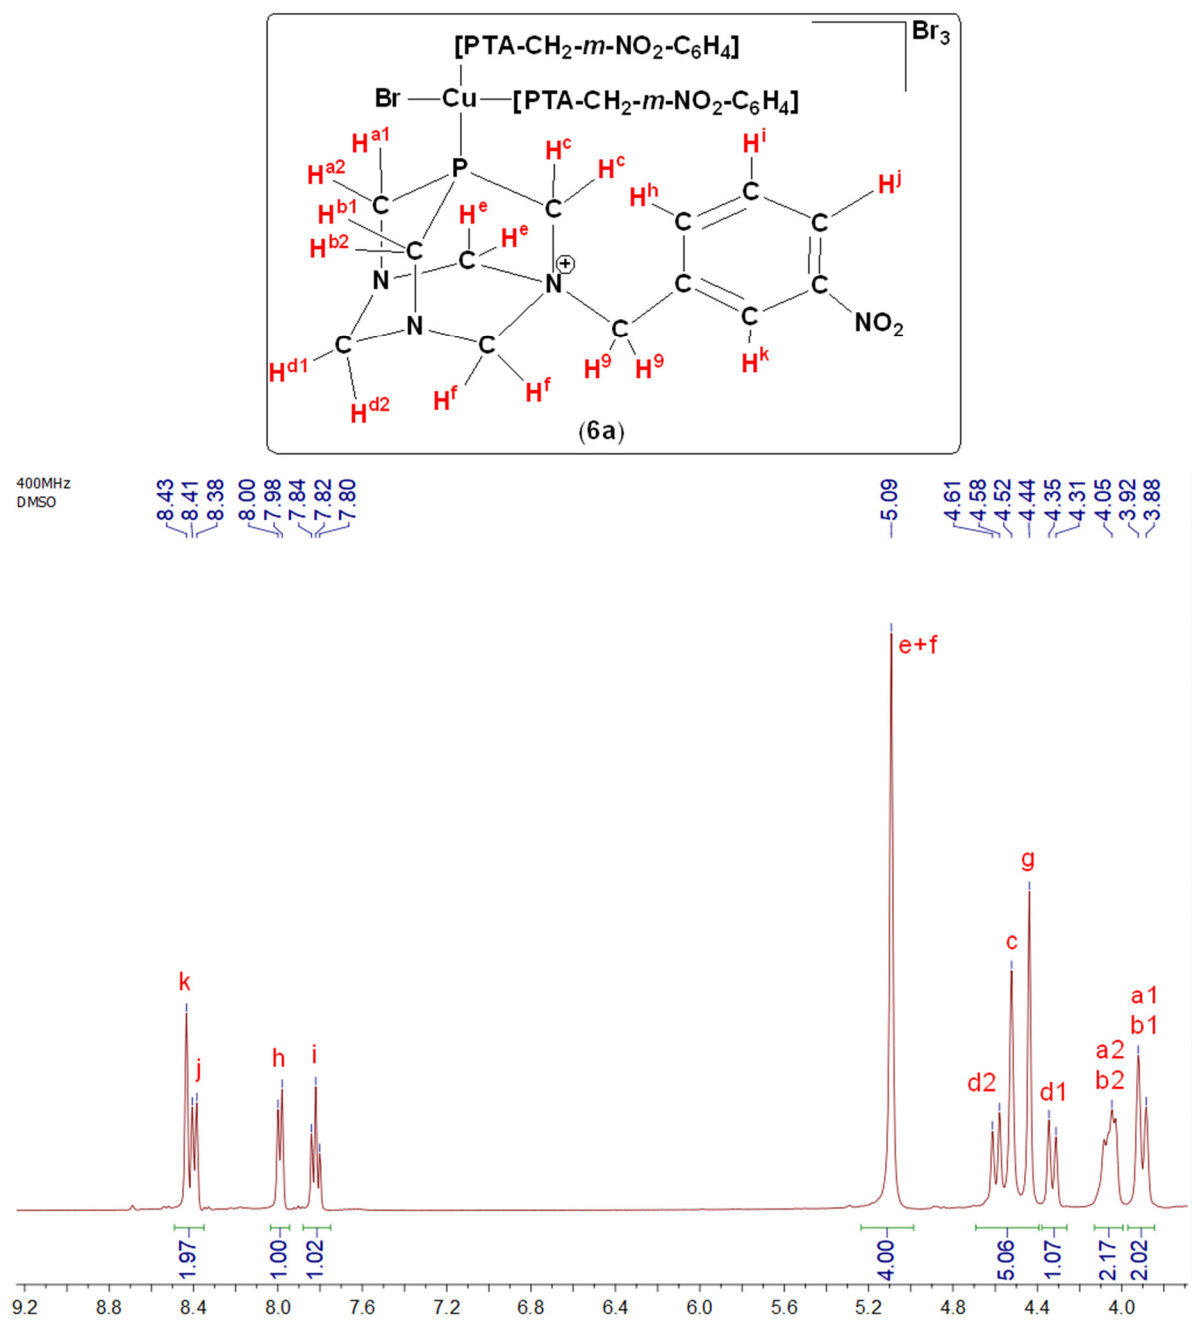

**Figure S39.**  $^1\text{H}$  NMR spectrum of  $[\text{CuBr}(\text{PTA-CH}_2\text{-}m\text{-NO}_2\text{-C}_6\text{H}_4)_3] \cdot \text{Br}_3$  (**6a**) in DMSO-*d*<sub>6</sub> (400 MHz).

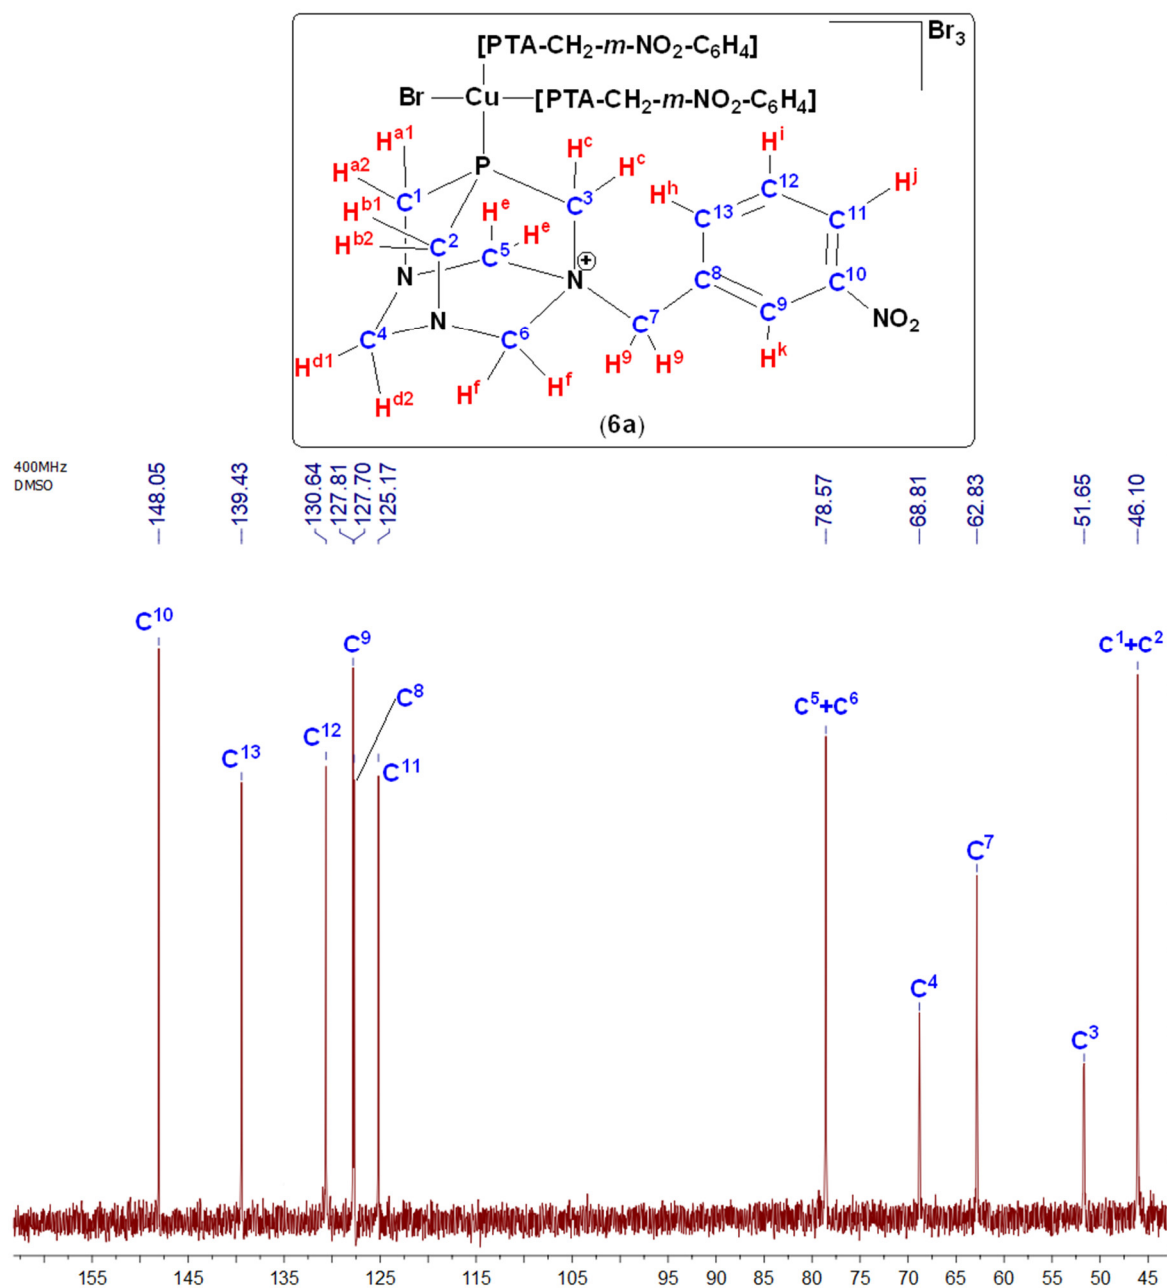

**Figure S40.**  $^{13}\text{C}$  NMR spectrum of  $[\text{CuBr}(\text{PTA-CH}_2\text{-}m\text{-NO}_2\text{-C}_6\text{H}_4)_3] \cdot \text{Br}_3$  (6a) in  $\text{DMSO-}d_6$  (400 MHz).



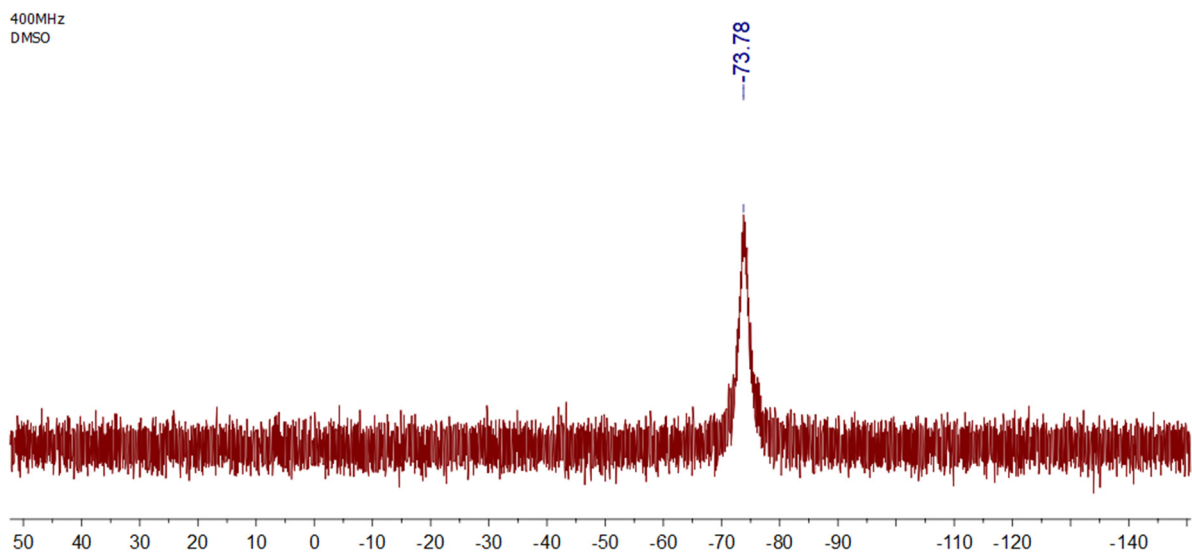

**Figure S41.**  $^{31}\text{P}$  NMR spectrum of  $[\text{CuBr}(\text{PTA-CH}_2\text{-}m\text{-NO}_2\text{-C}_6\text{H}_4)_3]\cdot\text{Br}_3$  (**6a**) in  $\text{DMSO-}d_6$  (400 MHz).

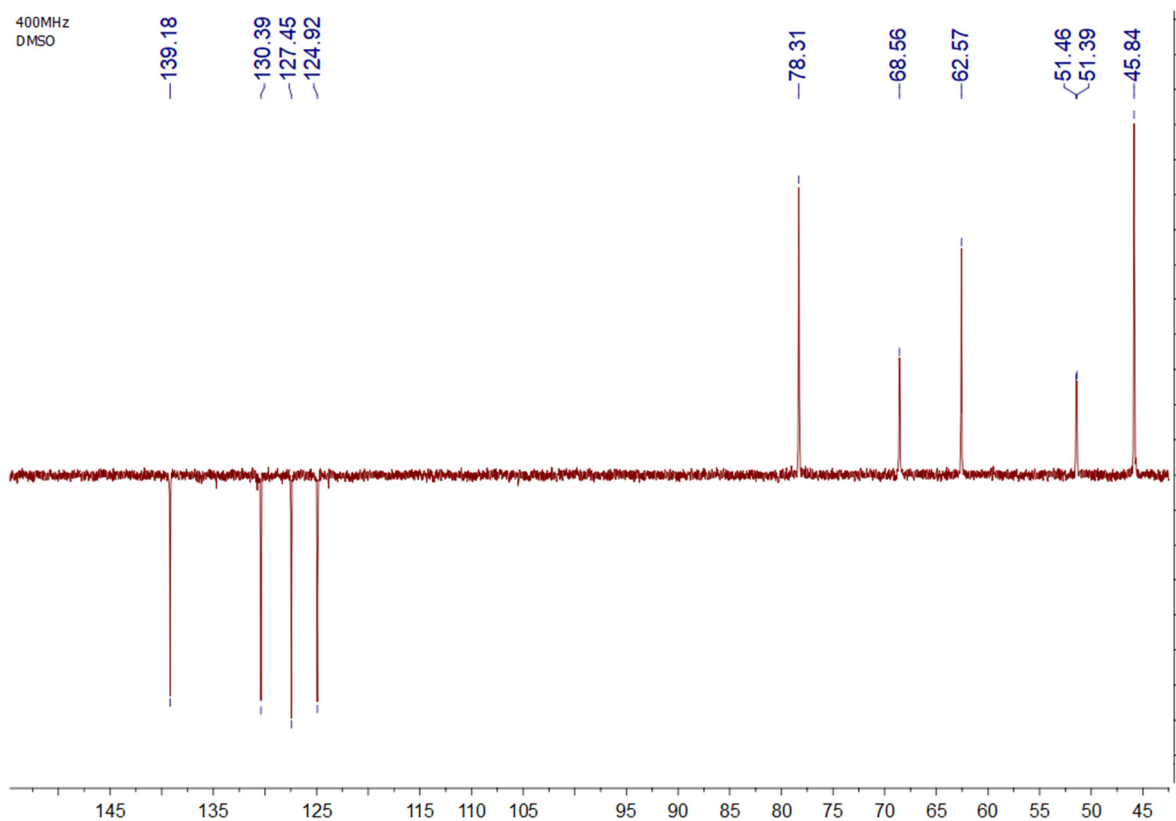

**Figure S42.** DEPT NMR spectrum of  $[\text{CuBr}(\text{PTA-CH}_2\text{-}m\text{-NO}_2\text{-C}_6\text{H}_4)_3]\cdot\text{Br}_3$  (**6a**) in  $\text{DMSO-}d_6$  (400 MHz).

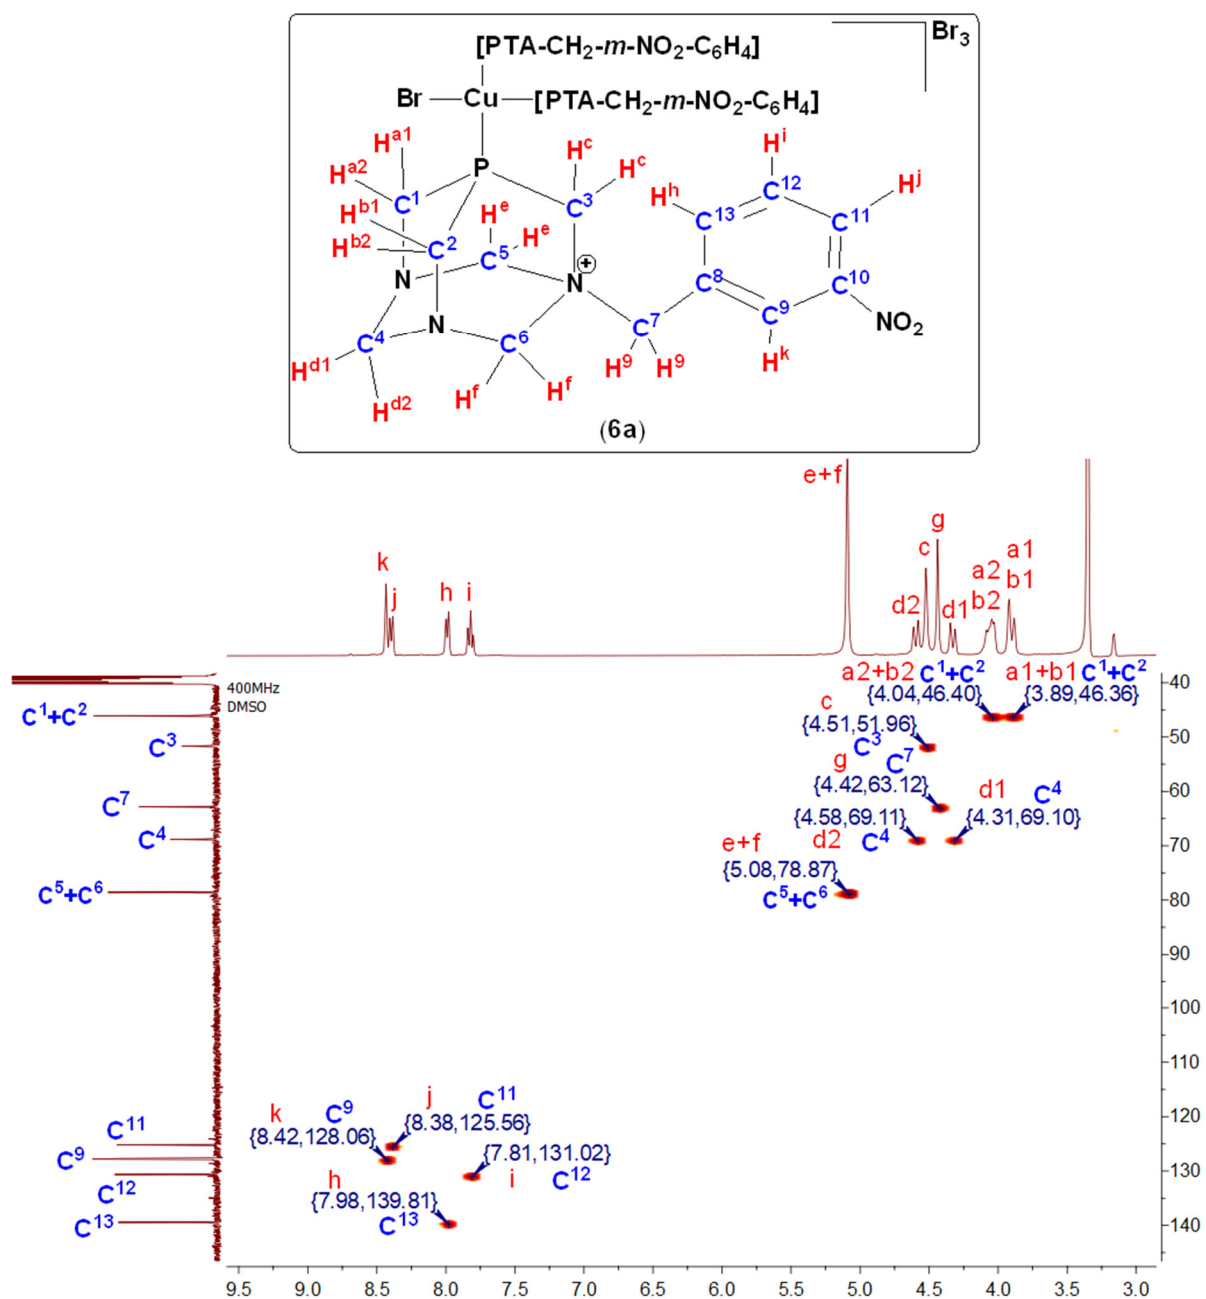

**Figure S43.** HSQC spectrum of  $[\text{CuBr}(\text{PTA-CH}_2\text{-}m\text{-NO}_2\text{-C}_6\text{H}_4)_3] \cdot \text{Br}_3$  (**6a**) in  $\text{DMSO-}d_6$  (400 MHz).

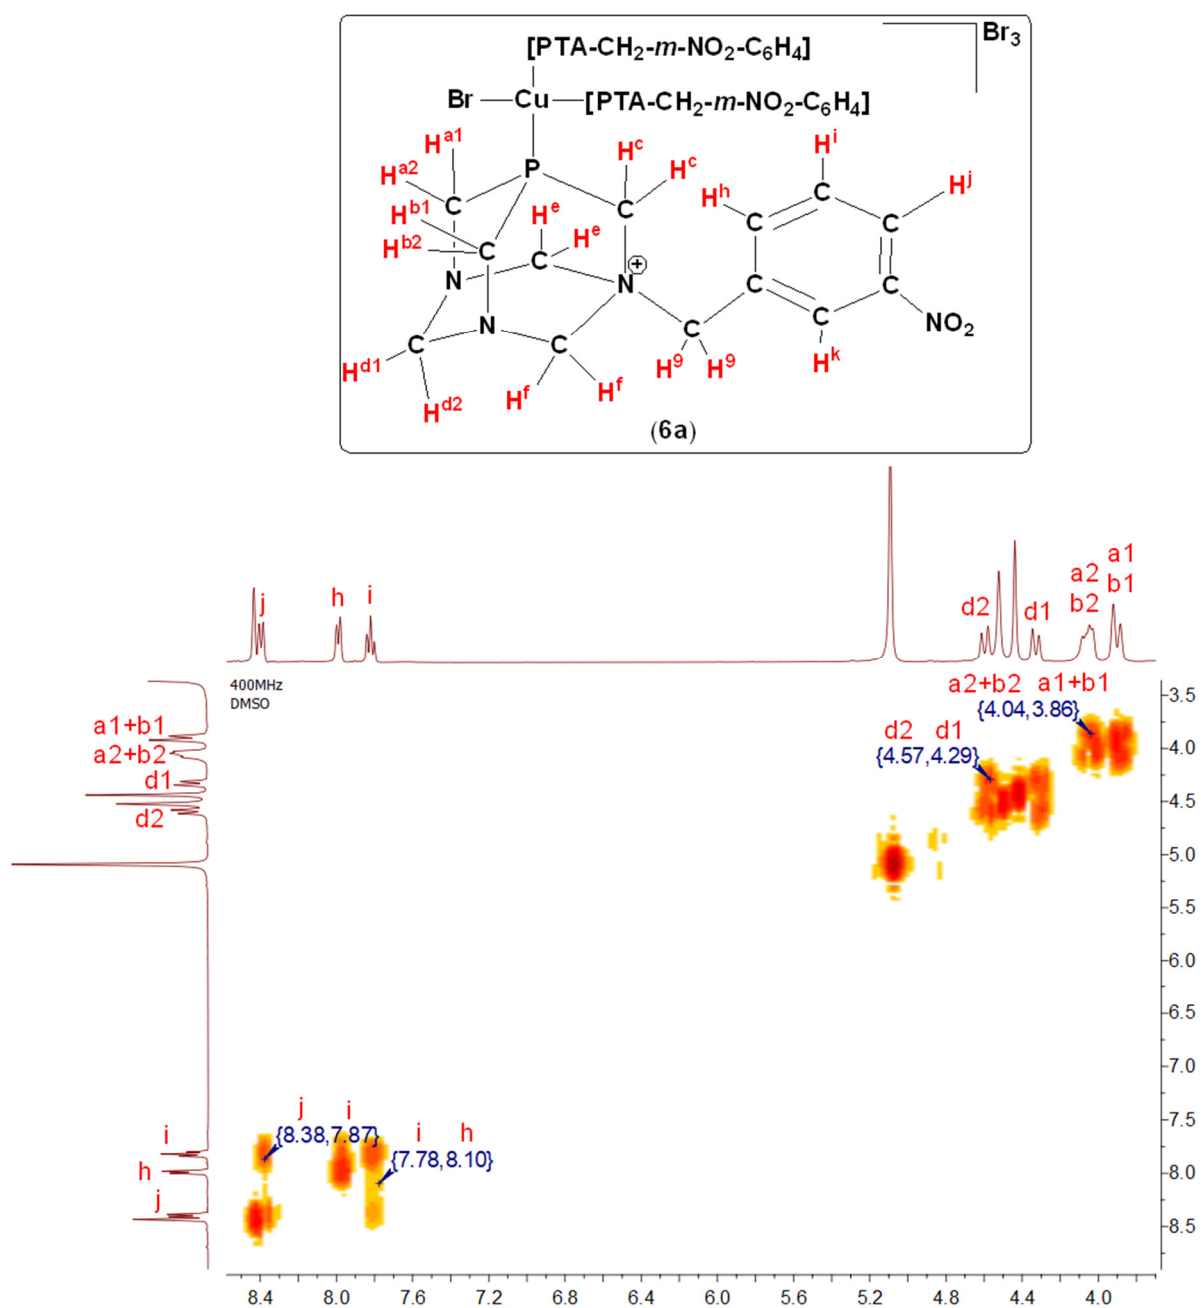

**Figure S44.** COSY spectrum of [CuBr(PTA-CH<sub>2</sub>-*m*-NO<sub>2</sub>-C<sub>6</sub>H<sub>4</sub>)<sub>3</sub>]·Br<sub>3</sub> (**6a**) in DMSO-*d*<sub>6</sub> (400 MHz).

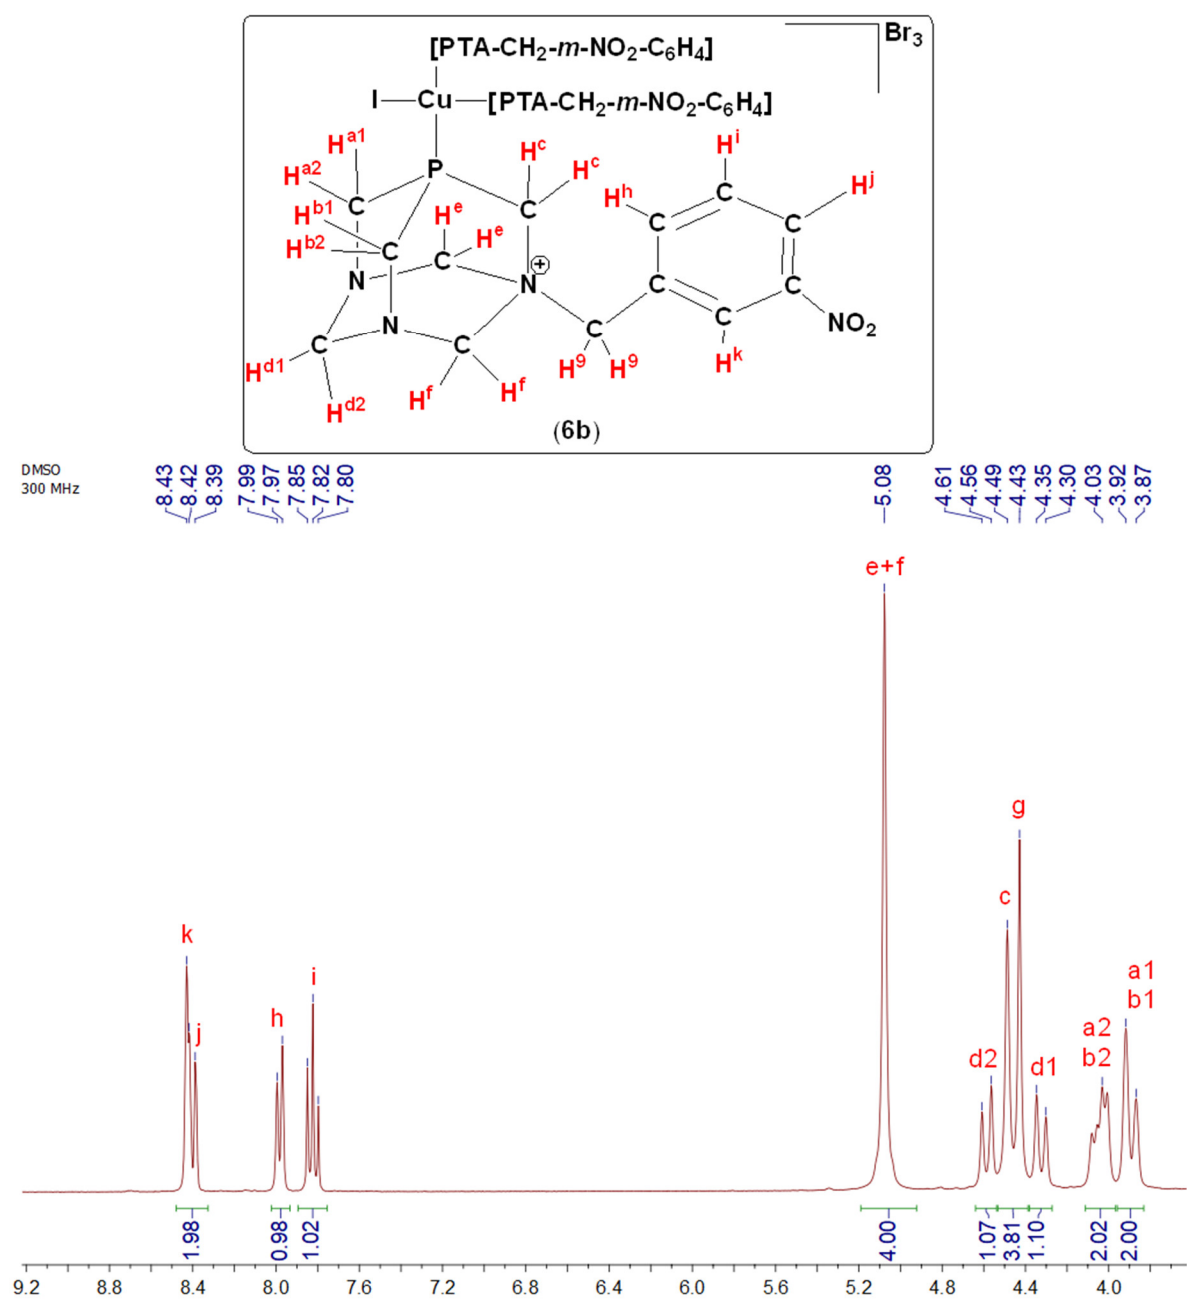

**Figure S45.**  $^1\text{H}$  NMR spectrum of  $[\text{CuI}(\text{PTA-CH}_2\text{-}m\text{-NO}_2\text{-C}_6\text{H}_4)_3]\cdot\text{Br}_3$  (**6b**) in  $\text{DMSO-}d_6$  (300 MHz).

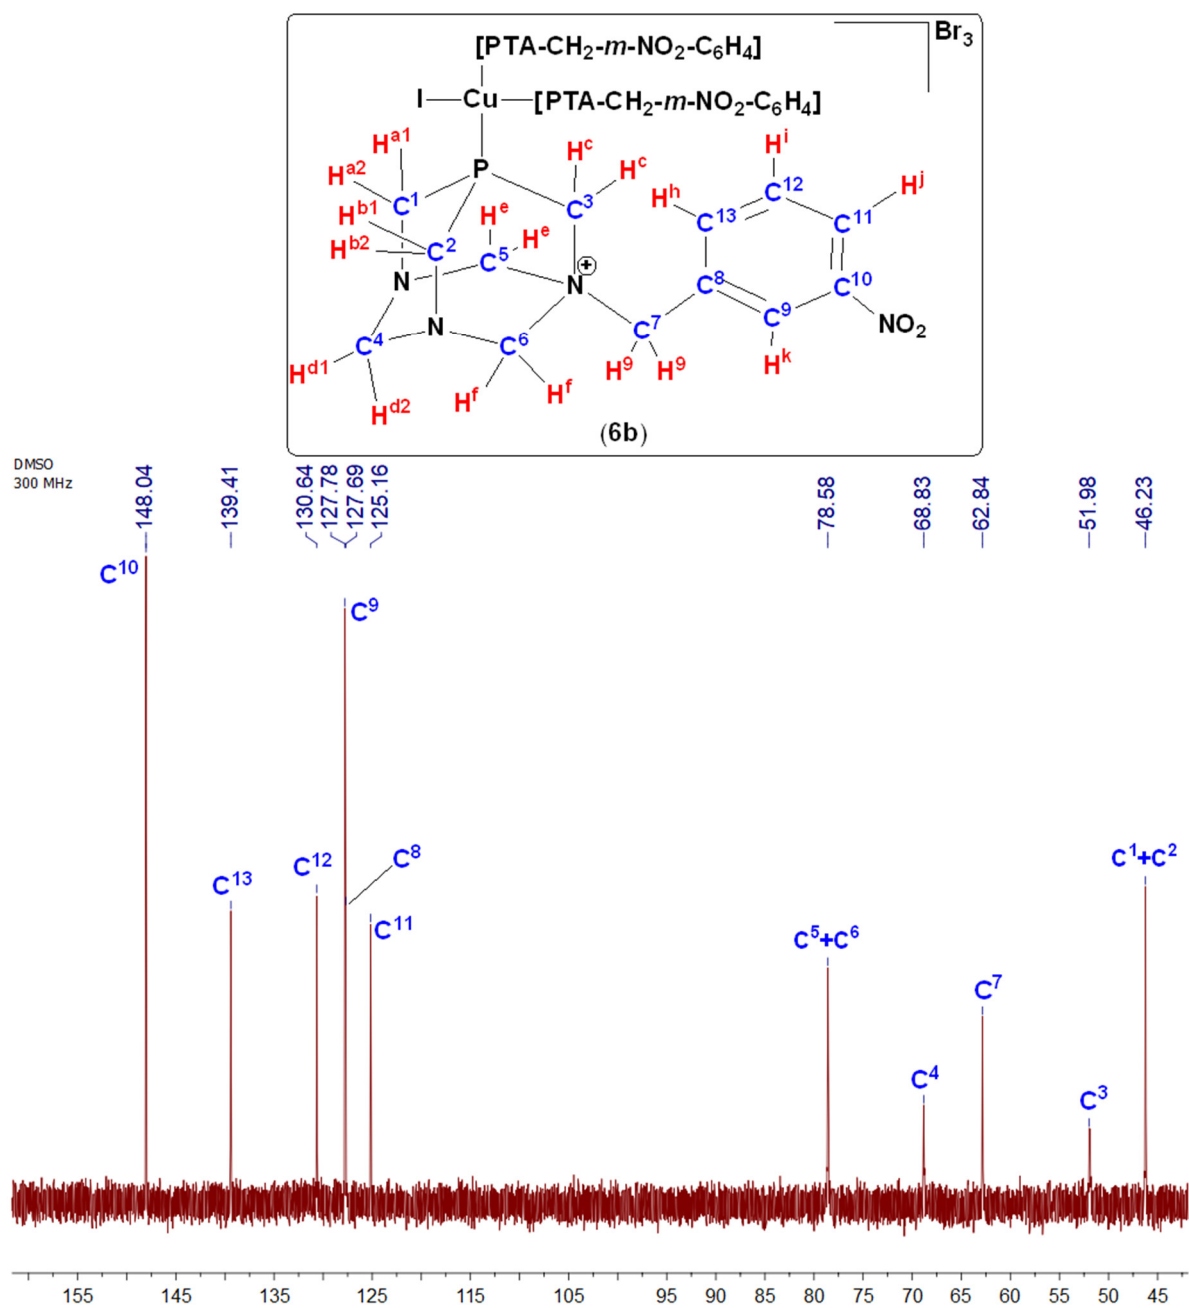

**Figure S46.**  $^{13}\text{C}$  NMR spectrum of  $[\text{CuI}(\text{PTA-CH}_2\text{-}m\text{-NO}_2\text{-C}_6\text{H}_4)_3]\cdot\text{Br}_3$  (6b) in  $\text{DMSO-}d_6$  (300 MHz).

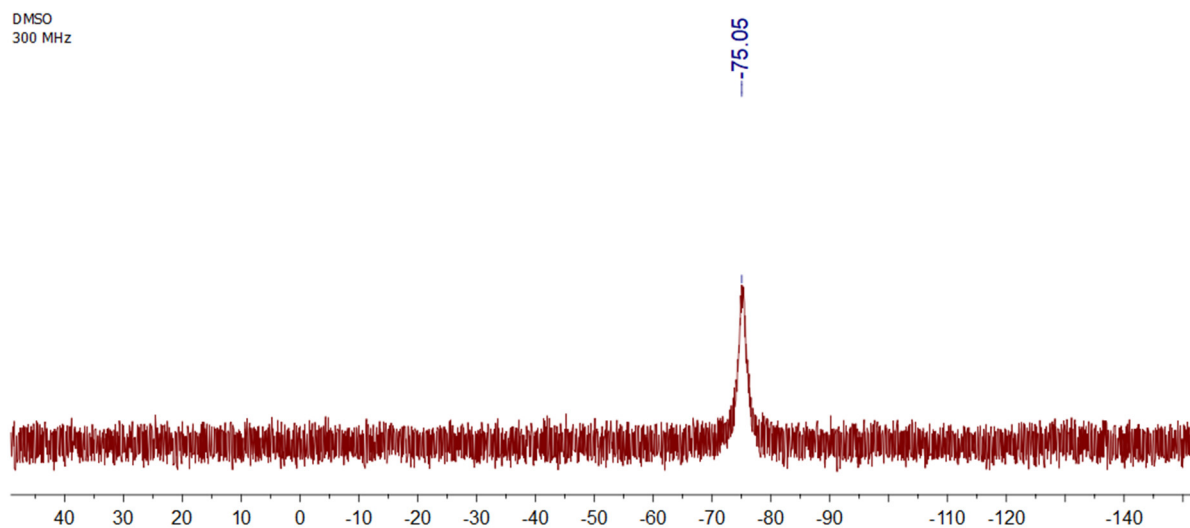

**Figure S47.**  $^{31}\text{P}$  NMR spectrum of  $[\text{CuI}(\text{PTA-CH}_2\text{-}m\text{-NO}_2\text{-C}_6\text{H}_4)_3]\cdot\text{Br}_3$  (**6b**) in  $\text{DMSO-}d_6$  (300 MHz).

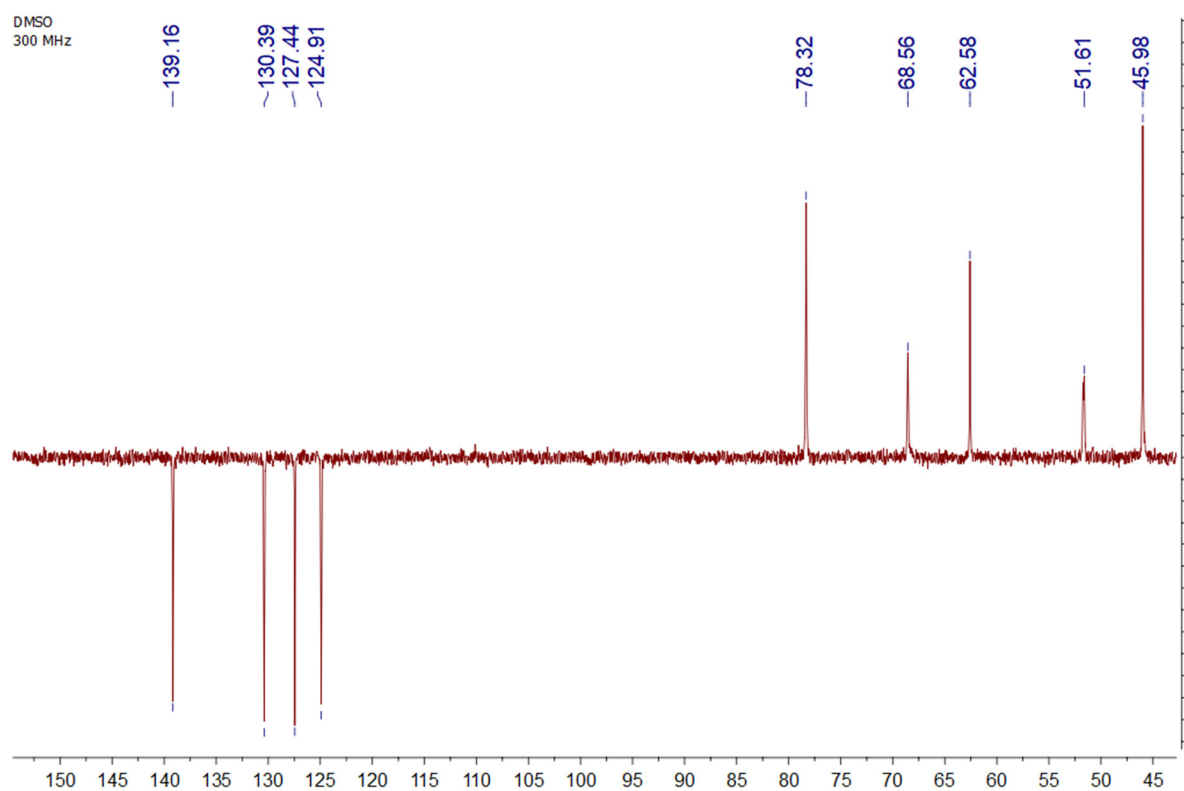

**Figure S48.** DEPT NMR spectrum of  $[\text{CuI}(\text{PTA-CH}_2\text{-}m\text{-NO}_2\text{-C}_6\text{H}_4)_3]\cdot\text{Br}_3$  (**6b**) in  $\text{DMSO-}d_6$  (300 MHz).

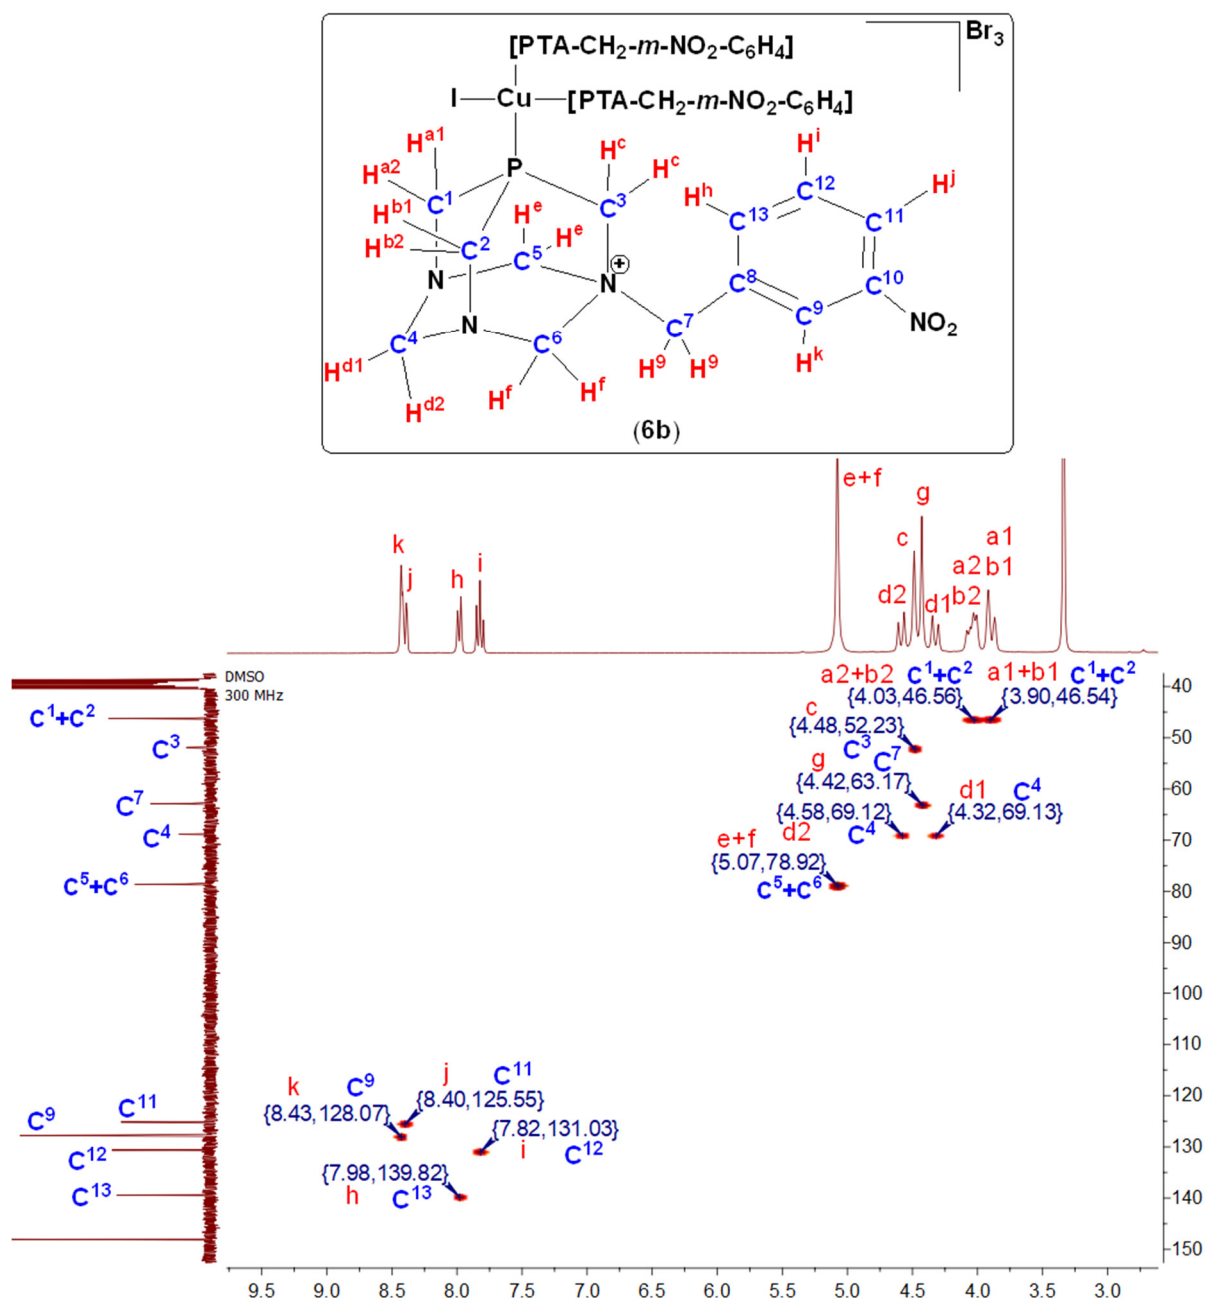

Figure S49. HSQC spectrum of  $[CuI(PTA-CH_2-m-NO_2-C_6H_4)_3] \cdot Br_3$  (**6b**) in  $DMSO-d_6$  (300 MHz).

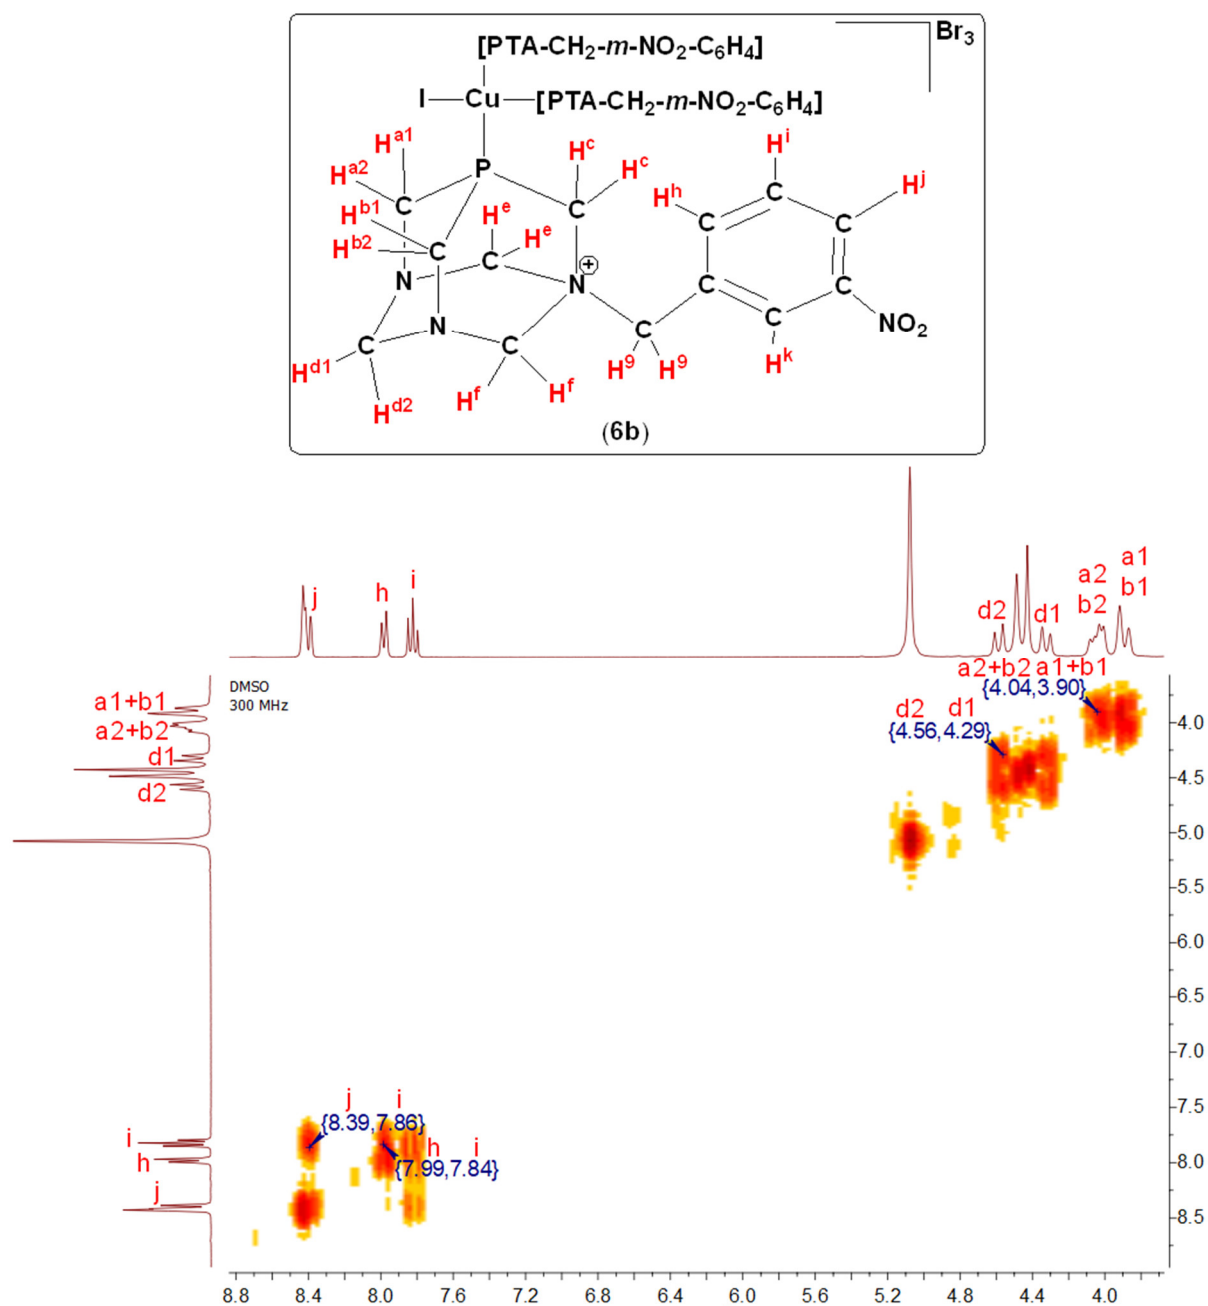

**Figure S50.** COSY spectrum of  $[\text{CuI}(\text{PTA-CH}_2\text{-}m\text{-NO}_2\text{-C}_6\text{H}_4)_3]\cdot\text{Br}_3$  (6b) in DMSO- $d_6$  (300 MHz).



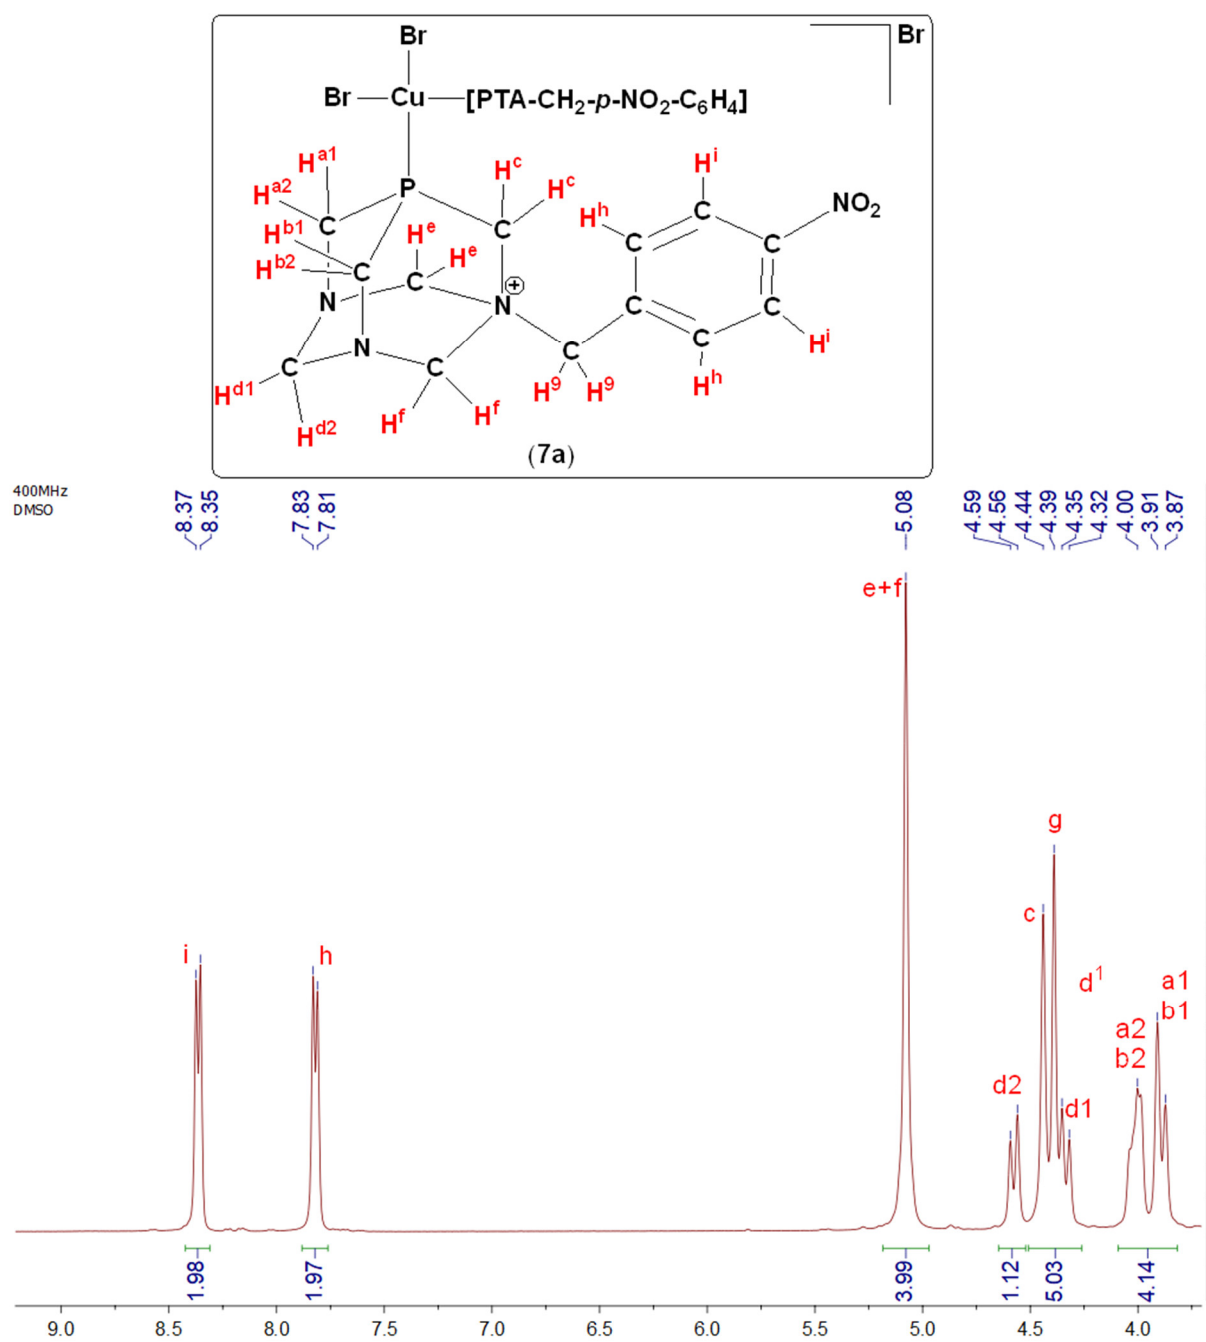

**Figure S51.** <sup>1</sup>H NMR spectrum of [CuBr<sub>2</sub>(PTA-CH<sub>2</sub>-*p*-NO<sub>2</sub>-C<sub>6</sub>H<sub>4</sub>)<sub>2</sub>·Br (**7a**) in DMSO-*d*<sub>6</sub> (400 MHz).

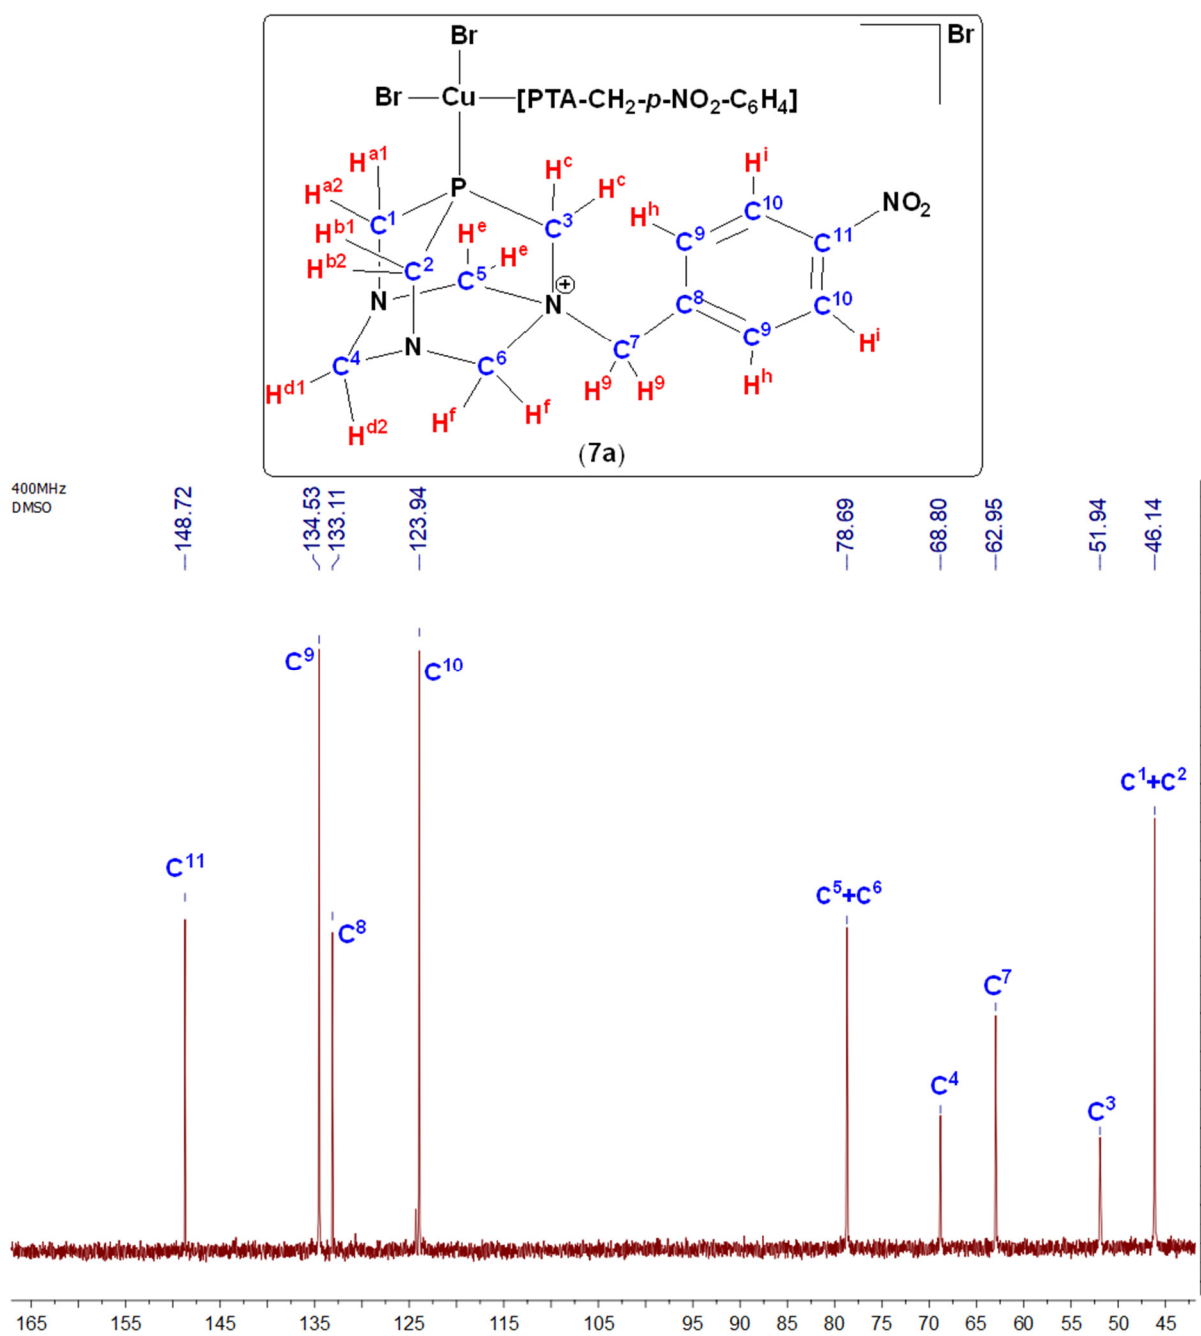

**Figure S52.** <sup>13</sup>C NMR spectrum of  $[\text{CuBr}_2(\text{PTA-CH}_2\text{-}p\text{-NO}_2\text{-C}_6\text{H}_4)_2]\cdot\text{Br}$  (**7a**) in DMSO-*d*<sub>6</sub> (400 MHz).

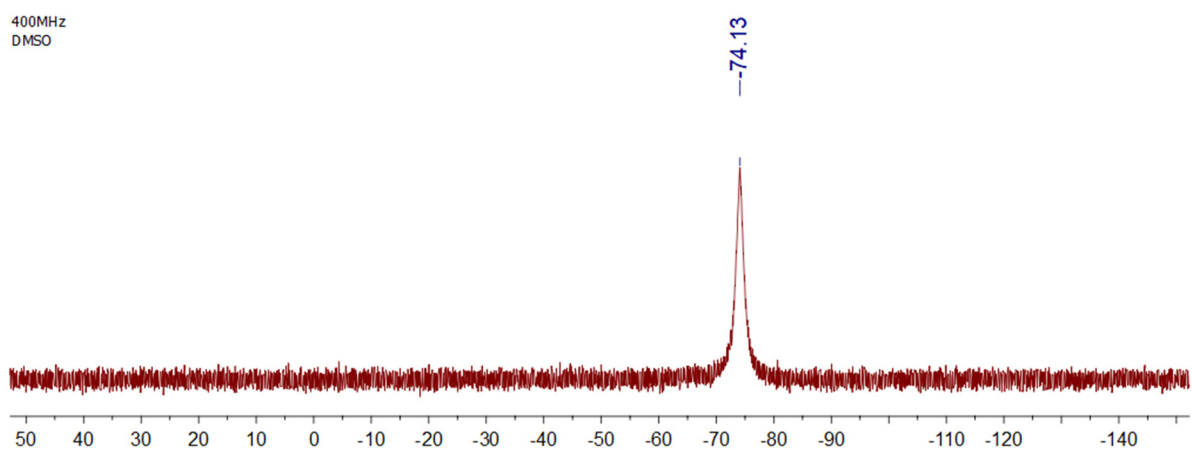

**Figure S53.**  $^{31}\text{P}$  NMR spectrum of  $[\text{CuBr}_2(\text{PTA-CH}_2\text{-}p\text{-NO}_2\text{-C}_6\text{H}_4)_2]\cdot\text{Br}$  (**7a**) in  $\text{DMSO-}d_6$  (400 MHz).

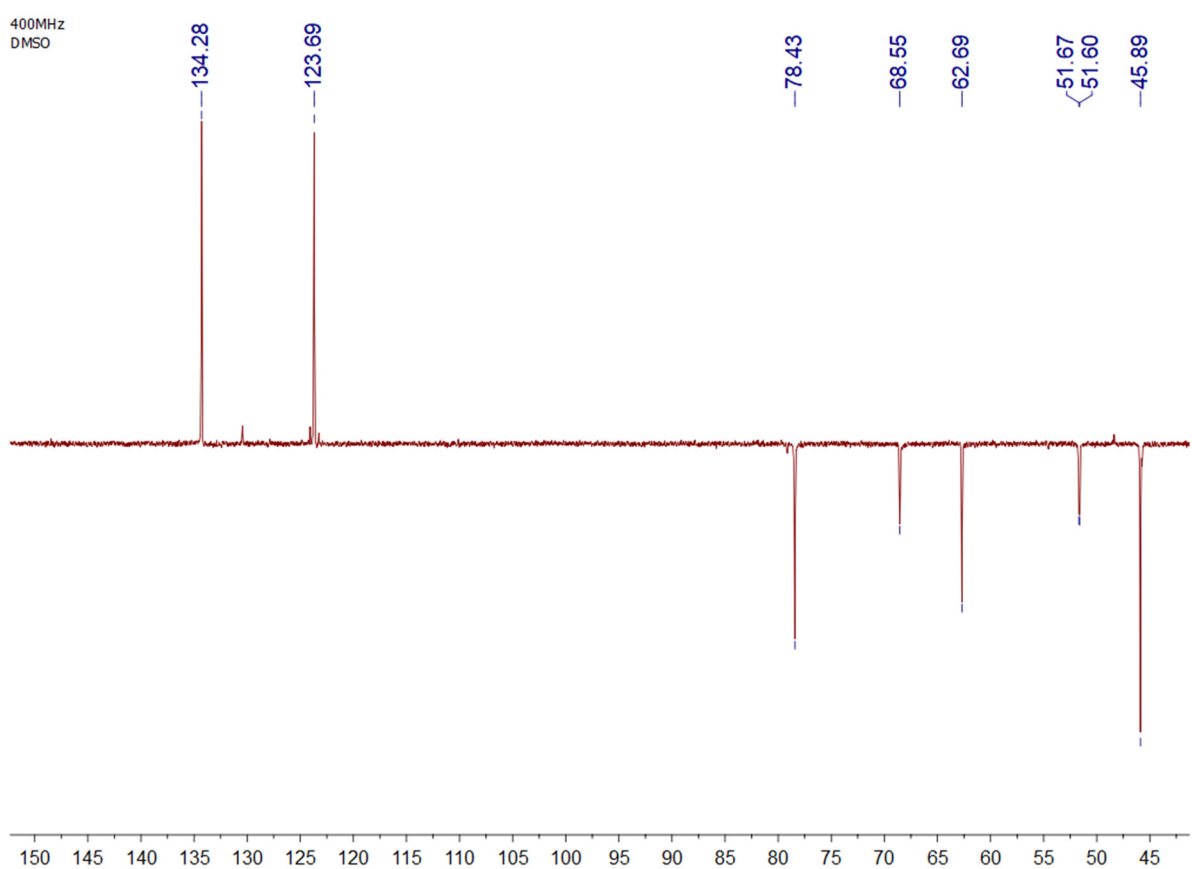

**Figure S54.** DEPT NMR spectrum of  $[\text{CuBr}_2(\text{PTA-CH}_2\text{-}p\text{-NO}_2\text{-C}_6\text{H}_4)_2]\cdot\text{Br}$  (**7a**) in  $\text{DMSO-}d_6$  (400 MHz).

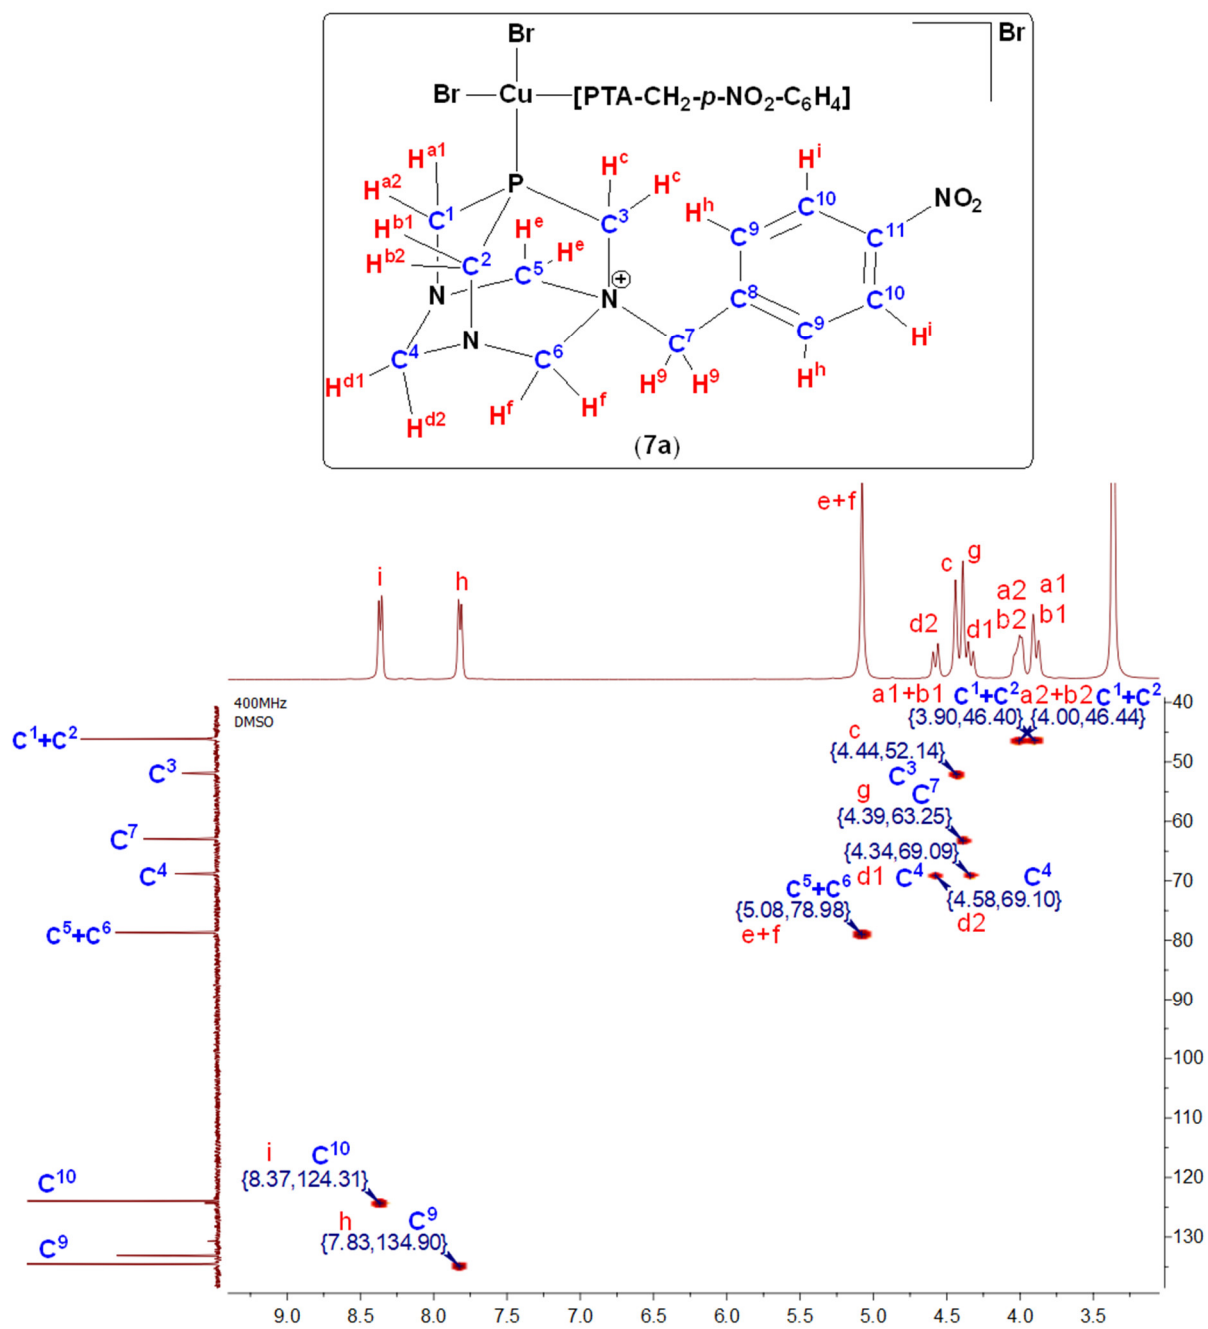

Figure S55. HSQC spectrum of  $[\text{CuBr}_2(\text{PTA-CH}_2\text{-}p\text{-NO}_2\text{-C}_6\text{H}_4)_2]\cdot\text{Br}$  (7a) in  $\text{DMSO-}d_6$  (400 MHz).

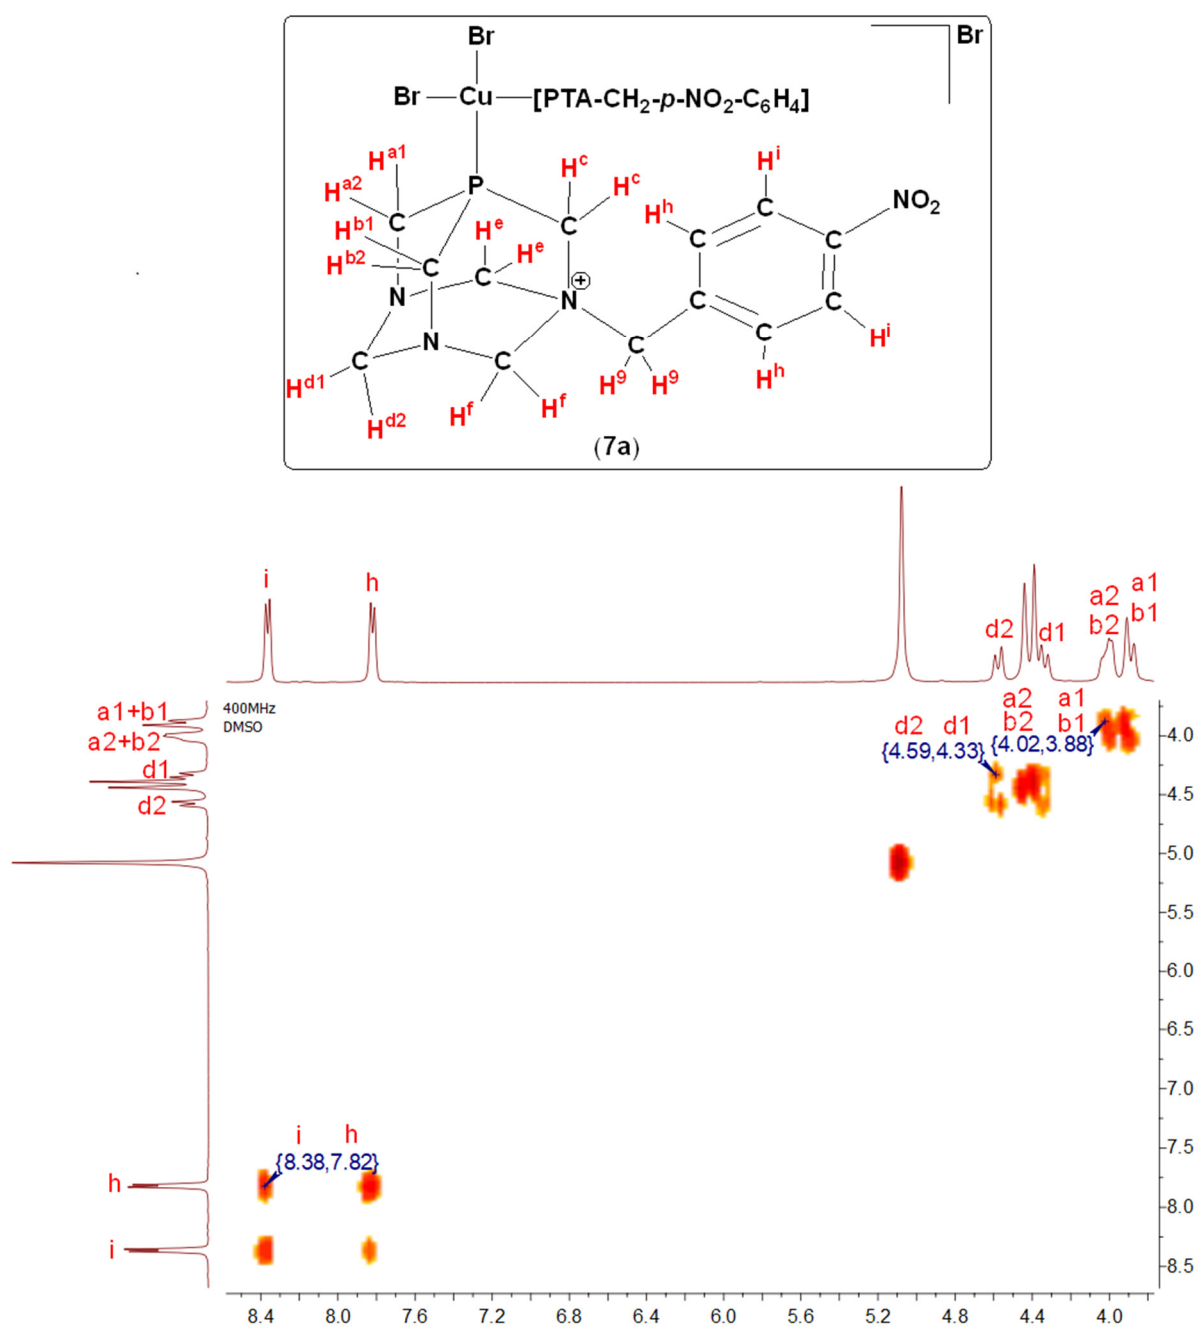

Figure S56. COSY spectrum of [CuBr<sub>2</sub>(PTA-CH<sub>2</sub>-*p*-NO<sub>2</sub>-C<sub>6</sub>H<sub>4</sub>)<sub>2</sub>]-Br (**7a**) in DMSO-*d*<sub>6</sub> (400 MHz).

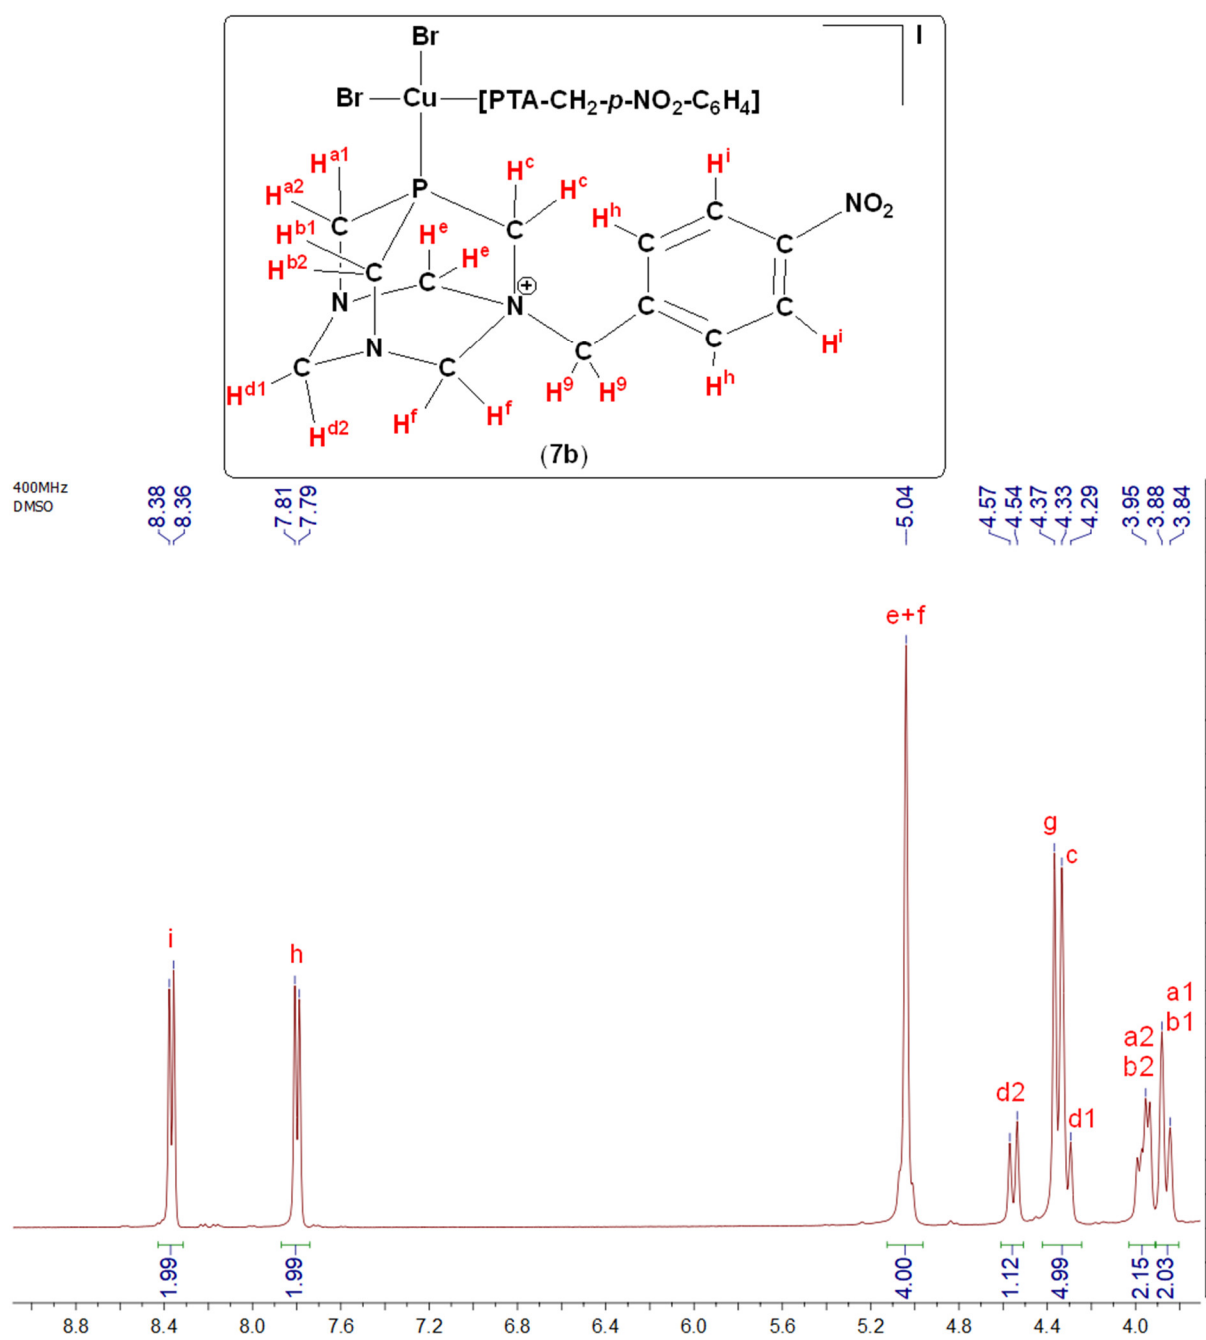

**Figure S57.**  $^1\text{H}$  NMR spectrum of  $[\text{CuBr}_2(\text{PTA-CH}_2\text{-p-NO}_2\text{-C}_6\text{H}_4)_2]\cdot\text{I}$  (7b) in  $\text{DMSO-}d_6$  (400 MHz).

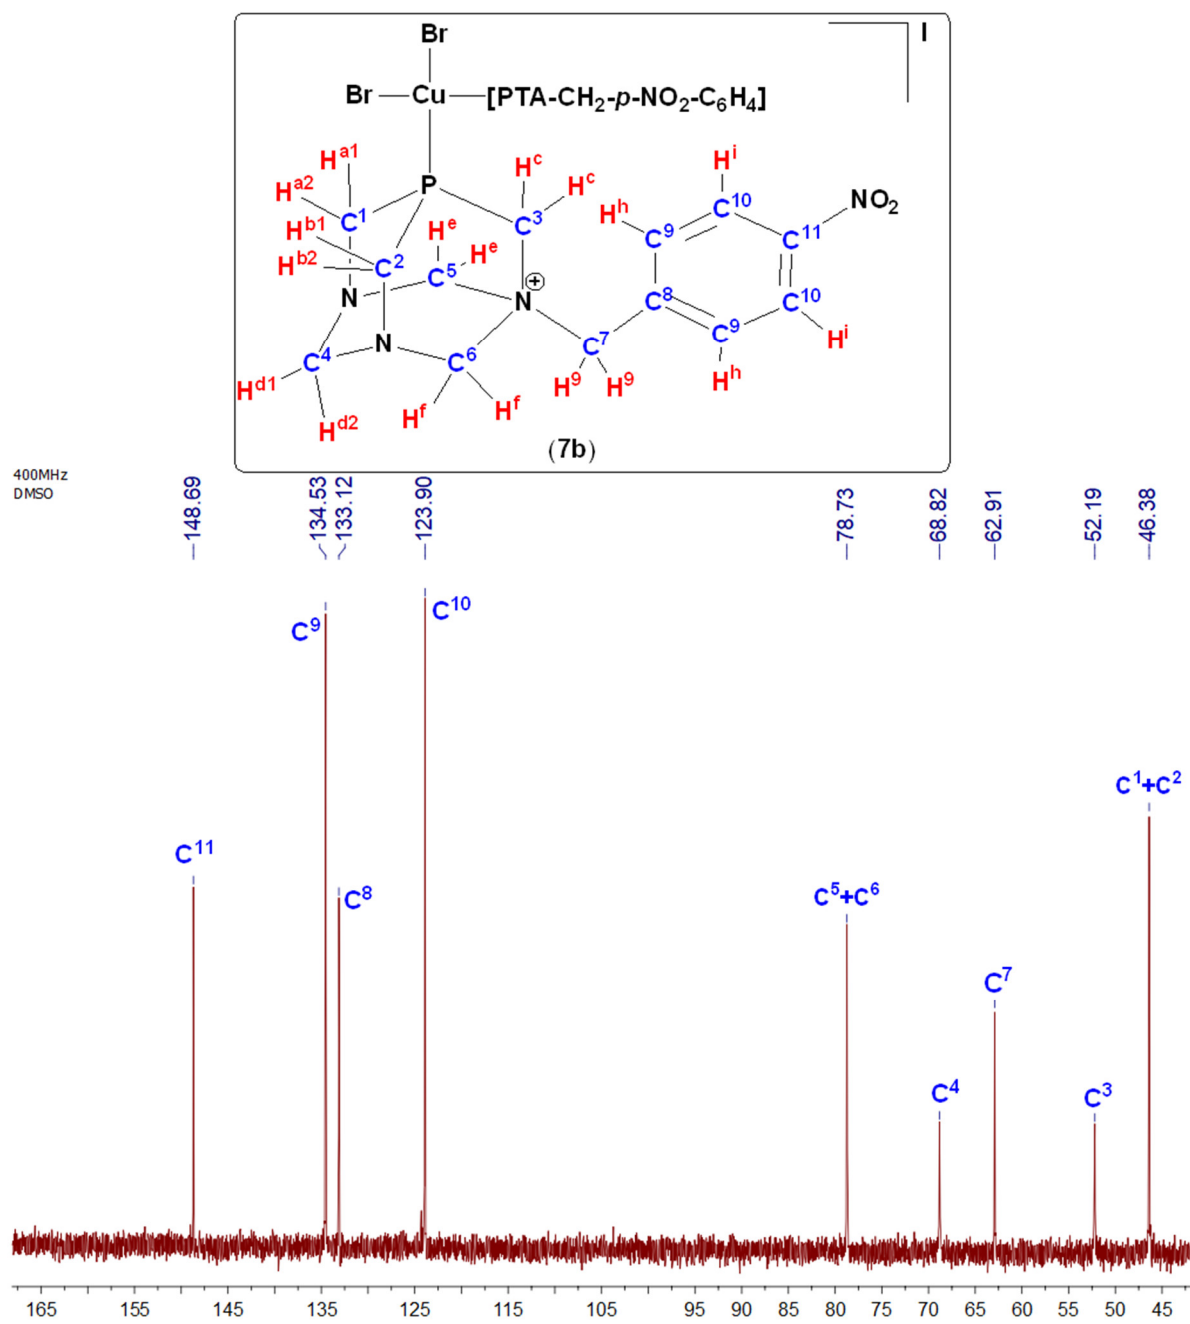

**Figure S58.**  $^{13}\text{C}$  NMR spectrum of  $[\text{CuBr}_2(\text{PTA-CH}_2\text{-}p\text{-NO}_2\text{-C}_6\text{H}_4)_2] \cdot \text{I}$  (7b) in  $\text{DMSO-}d_6$  (400 MHz).

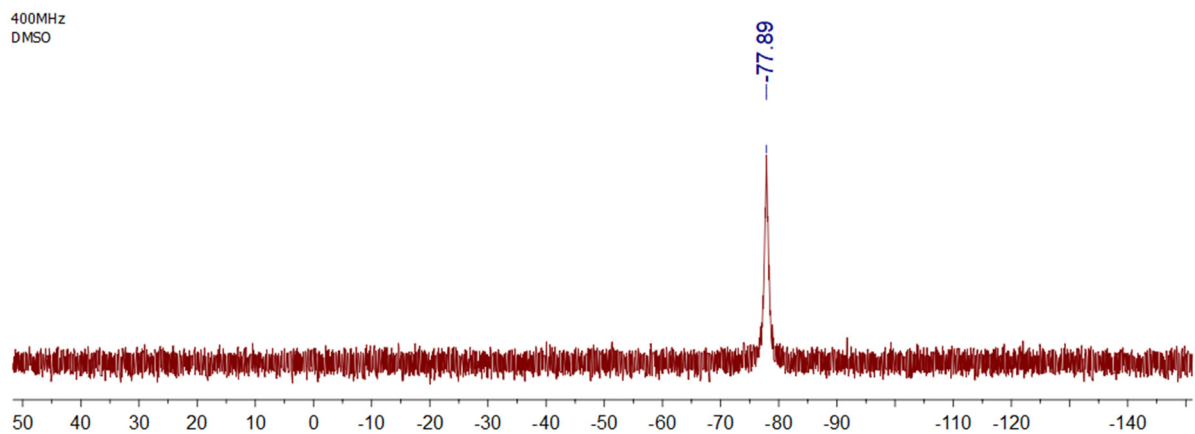

**Figure S59.**  $^{31}\text{P}$  NMR spectrum of  $[\text{CuBr}_2(\text{PTA-CH}_2\text{-}p\text{-NO}_2\text{-C}_6\text{H}_4)_2]\cdot\text{I}$  (**7b**) in  $\text{DMSO-}d_6$  (400 MHz).

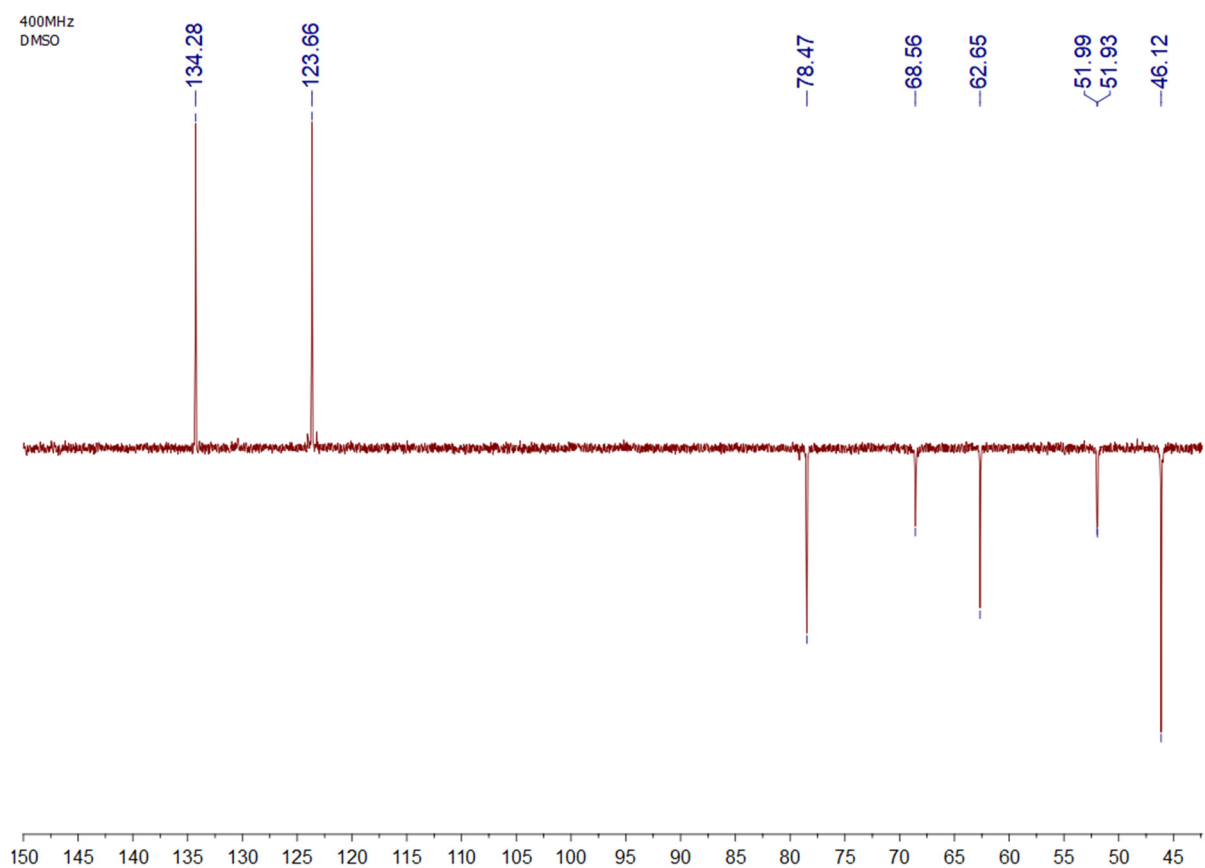

**Figure S60.** DEPT NMR spectrum of  $[\text{CuBr}_2(\text{PTA-CH}_2\text{-}p\text{-NO}_2\text{-C}_6\text{H}_4)_2]\cdot\text{I}$  (**7b**) in  $\text{DMSO-}d_6$  (400 MHz).



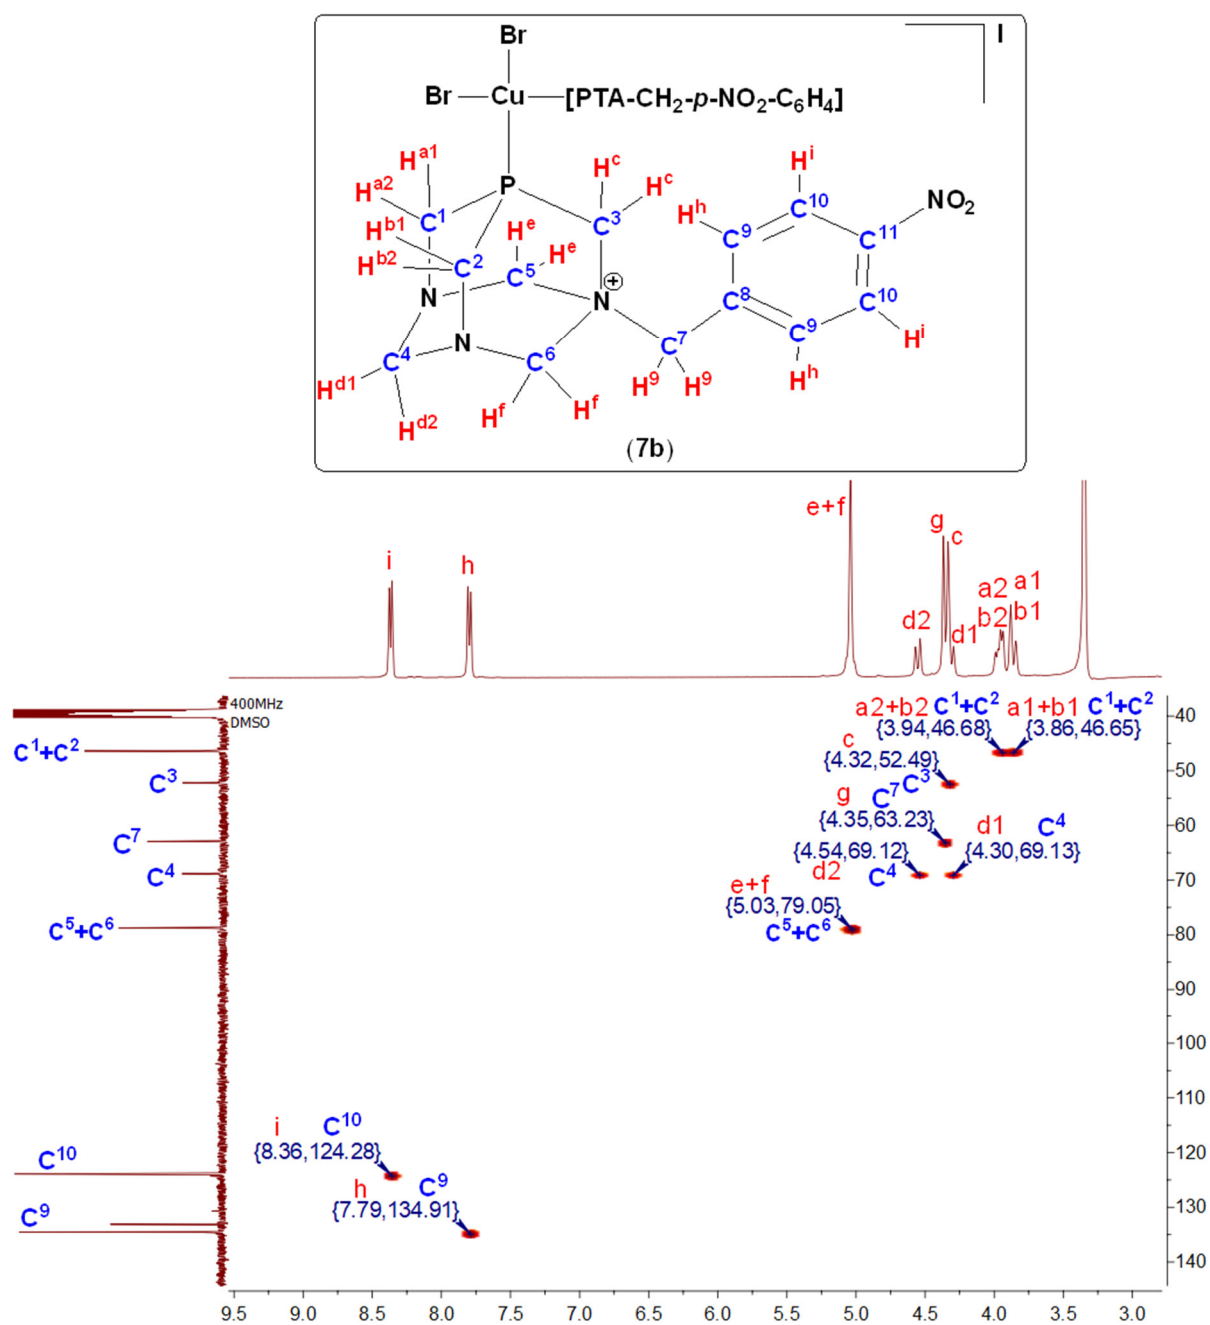

Figure S61. HSQC spectrum of  $[\text{CuBr}_2(\text{PTA-CH}_2\text{-p-NO}_2\text{-C}_6\text{H}_4)_2] \cdot \text{I}$  (7b) in  $\text{DMSO-}d_6$  (400 MHz).

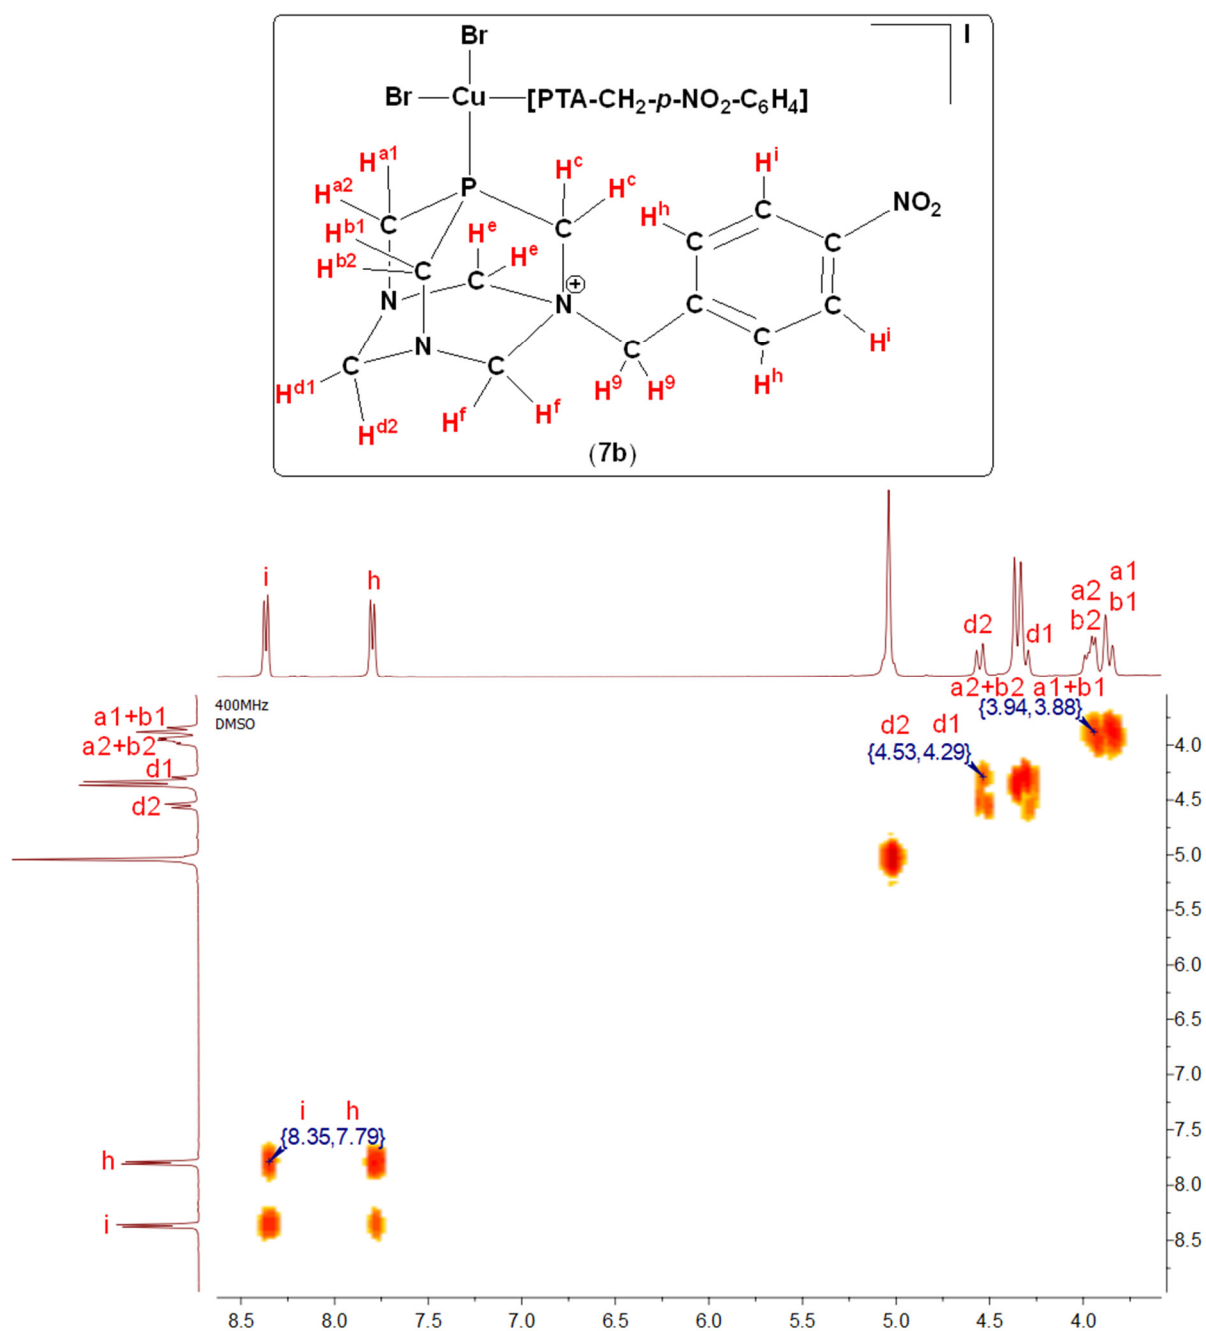

**Figure S62.** COSY spectrum of  $[CuBr_2(PTA-CH_2-p-NO_2-C_6H_4)_2] \cdot I$  (**7b**) in DMSO-*d*<sub>6</sub> (400 MHz).

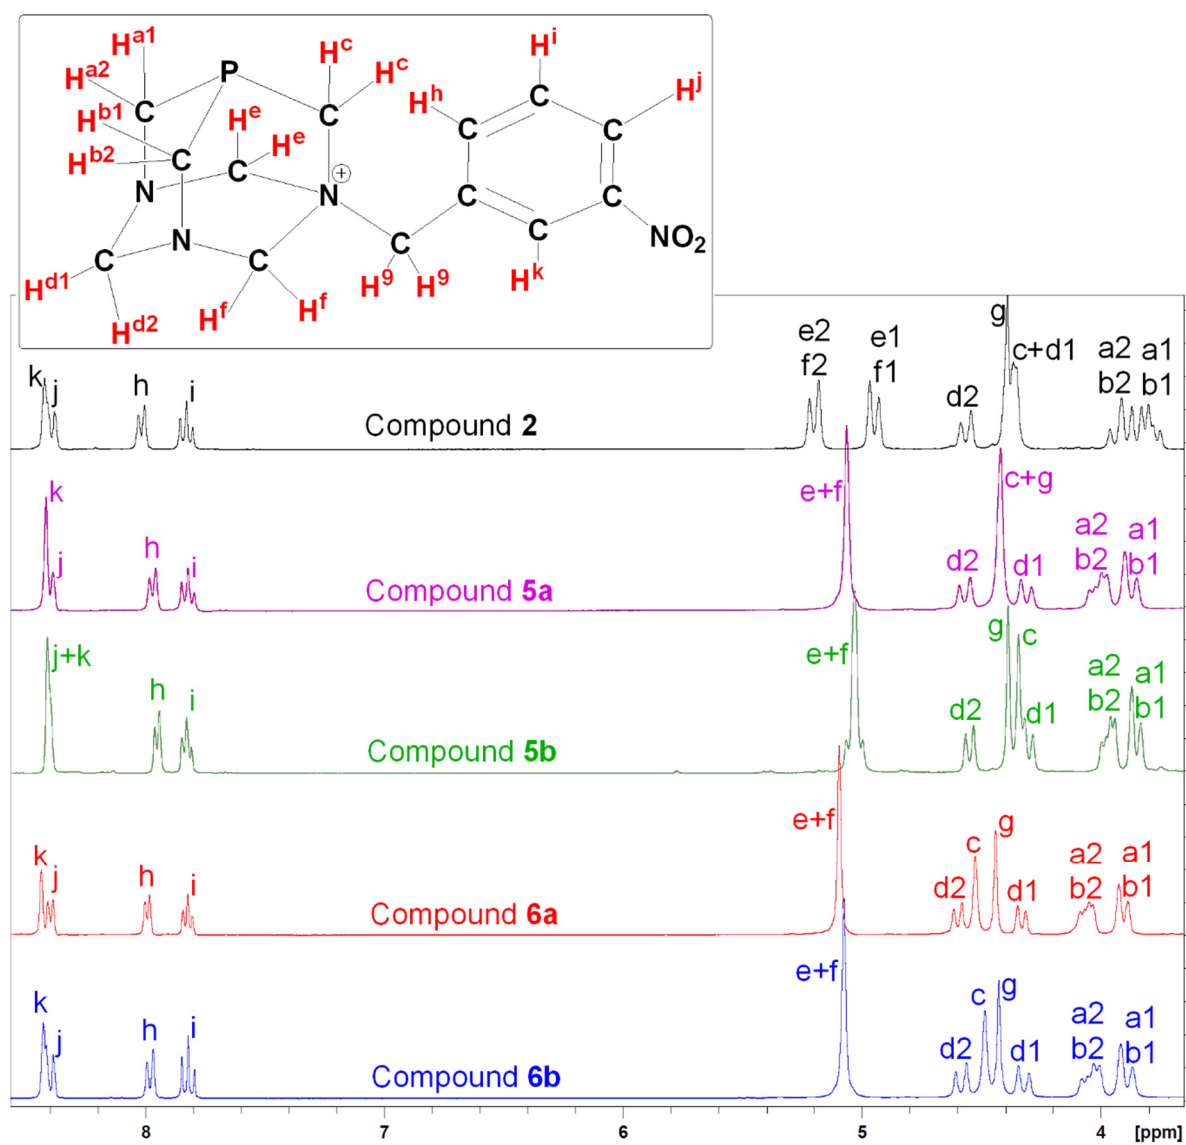

**Figure 63.**  $^1H$  NMR spectra of the free ligand **2** and its copper complexes **5a-6b** in  $DMSO-d_6$ .

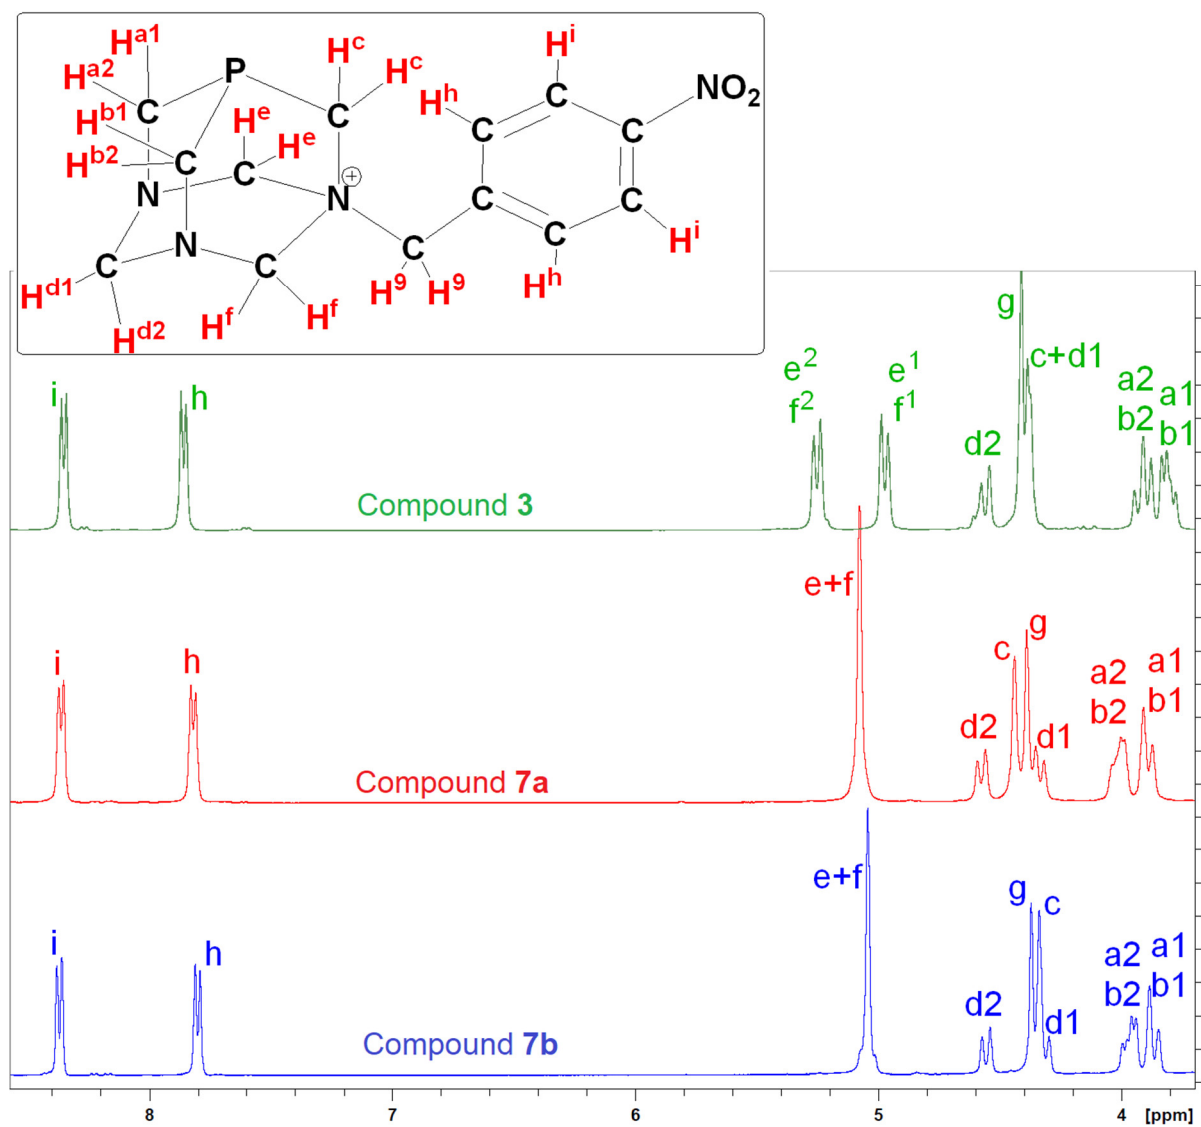

**Figure S64.** <sup>1</sup>H NMR spectra of (PTA-CH<sub>2</sub>-*p*-NO<sub>2</sub>-C<sub>6</sub>H<sub>4</sub>)Br (**3**) and its copper complexes **7a** and **7b** in DMSO-*d*<sub>6</sub>.

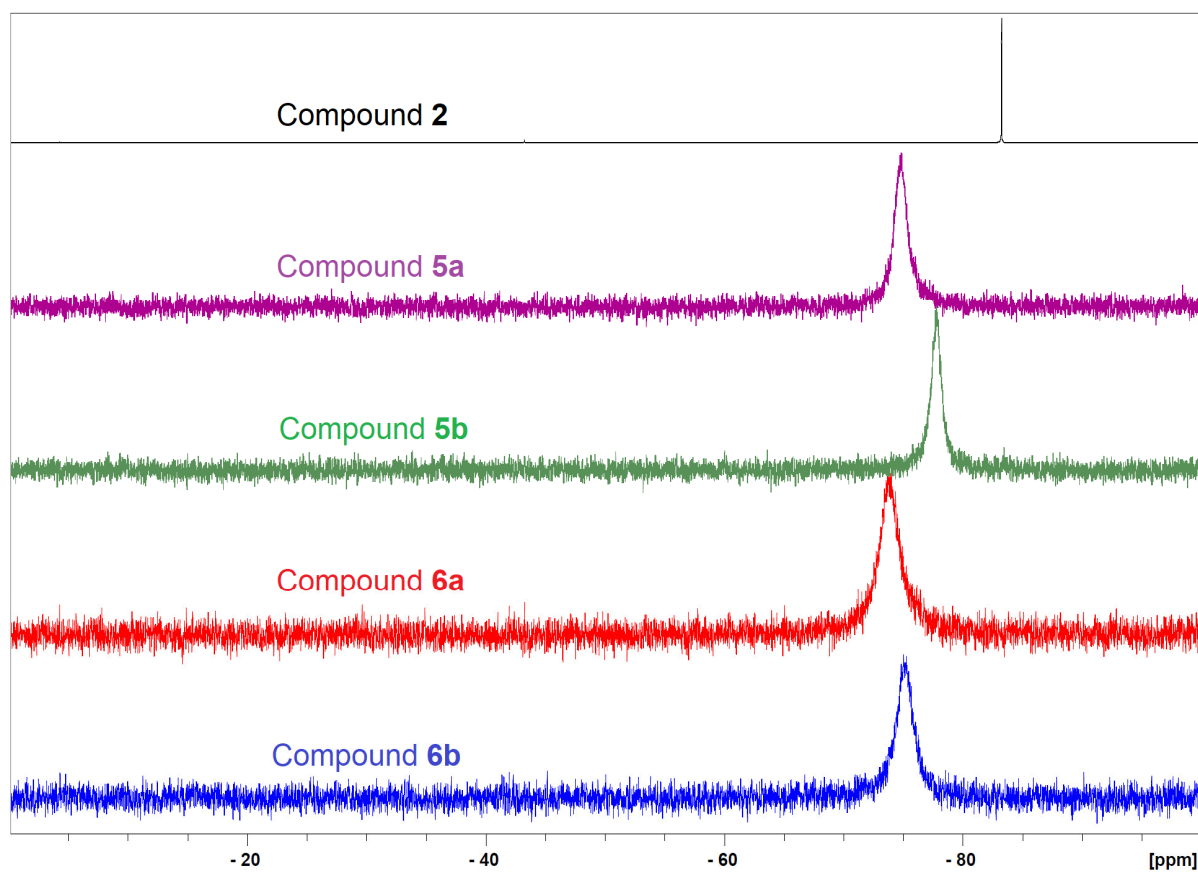

**Figure S65.**  $^{31}\text{P}$  NMR spectra of (PTA- $\text{CH}_2$ -*m*- $\text{NO}_2$ - $\text{C}_6\text{H}_4$ )Br (**2**) and its copper complexes **5a-6b** in  $\text{DMSO-}d_6$ .

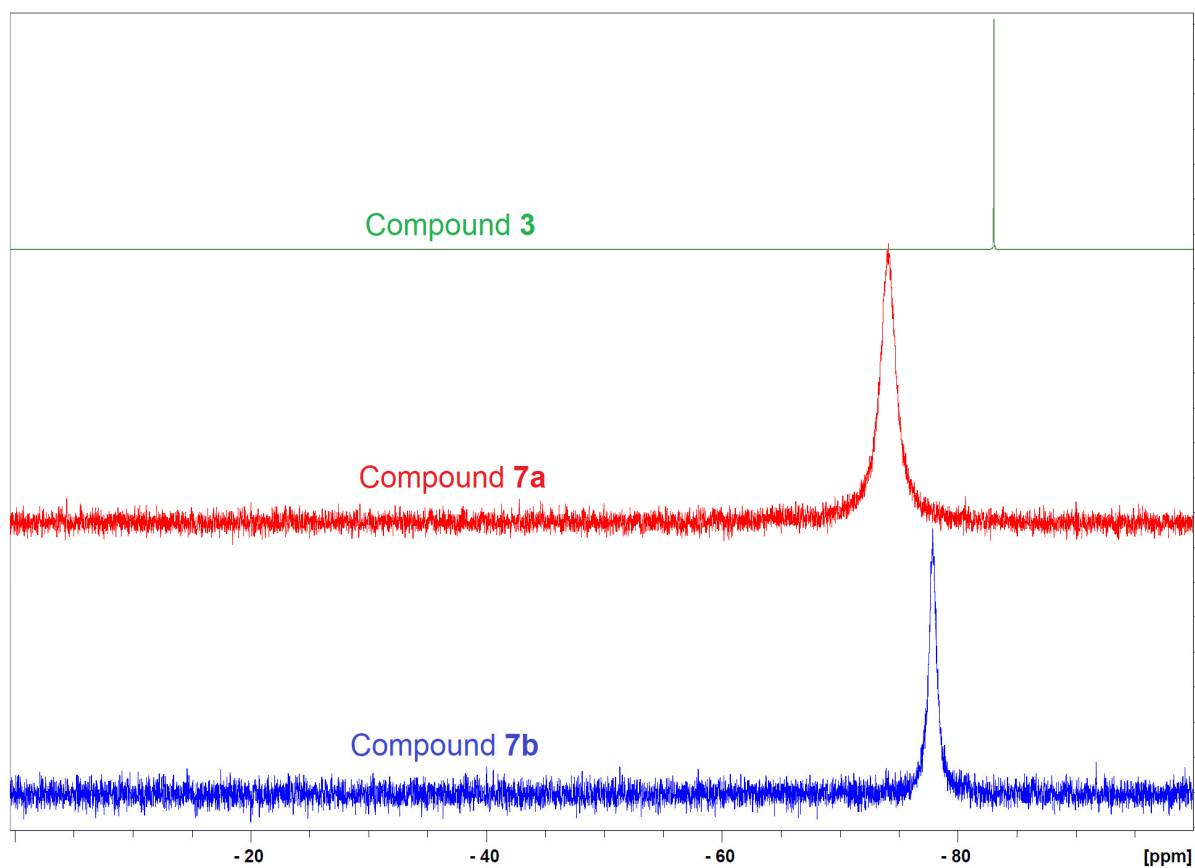

**Figure S66.**  $^{31}\text{P}$  NMR spectra of (PTA-CH<sub>2</sub>-*p*-NO<sub>2</sub>-C<sub>6</sub>H<sub>4</sub>)Br (**3**) and its copper complexes **7a** and **7b** in DMSO-*d*<sub>6</sub>.

## 2. X-Ray Data and Analysis

**Table S1.** Crystallographic data and structure refinement details for **2** and **3**.

|                                                                                    | <b>2</b>                                                          | <b>3</b>                                                                         | <b>5a·3H<sub>2</sub>O</b>                                                                      |
|------------------------------------------------------------------------------------|-------------------------------------------------------------------|----------------------------------------------------------------------------------|------------------------------------------------------------------------------------------------|
| Empirical formula                                                                  | C <sub>13</sub> H <sub>18</sub> BrN <sub>4</sub> O <sub>2</sub> P | C <sub>28</sub> H <sub>60</sub> Br <sub>5</sub> CuN <sub>12</sub> P <sub>4</sub> | C <sub>26</sub> H <sub>42</sub> Br <sub>3</sub> CuN <sub>8</sub> O <sub>7</sub> P <sub>2</sub> |
| Formula Weight                                                                     | 373.19                                                            | 1151.85                                                                          | 943.88                                                                                         |
| Crystal system                                                                     | Monoclinic                                                        | Triclinic                                                                        | Orthorhombic                                                                                   |
| Space group                                                                        | P 2 <sub>1</sub> /n                                               | P -1                                                                             | P n m a                                                                                        |
| Temperature/K                                                                      | 298(2)                                                            | 298(2)                                                                           | 296(2)                                                                                         |
| <i>a</i> /Å                                                                        | 7.8684(4)                                                         | 13.1151(10)                                                                      | 11.6280(5)                                                                                     |
| <i>b</i> /Å                                                                        | 11.4752(5)                                                        | 13.3747(13)                                                                      | 16.0923(6)                                                                                     |
| <i>c</i> /Å                                                                        | 16.8805(7)                                                        | 14.5809(9)                                                                       | 18.8040(8)                                                                                     |
| $\alpha$ /°                                                                        | 90                                                                | 110.207(3)                                                                       | 90                                                                                             |
| $\beta$ /°                                                                         | 90.996(2)                                                         | 95.396(6)                                                                        | 90                                                                                             |
| $\gamma$ /°                                                                        | 90                                                                | 96.922(6)                                                                        | 90                                                                                             |
| <i>V</i> (Å <sup>3</sup> )                                                         | 1523.93(12)                                                       | 2357.3(3)                                                                        | 3518.6(3)                                                                                      |
| <i>Z</i>                                                                           | 4                                                                 | 2                                                                                | 4                                                                                              |
| <i>D</i> <sub>calc</sub> (g cm <sup>-3</sup> )                                     | 1.627                                                             | 1.623                                                                            | 1.782                                                                                          |
| <i>F</i> 000                                                                       | 760                                                               | 1152                                                                             | 1896                                                                                           |
| $\mu$ (Mo K $\alpha$ ) (mm <sup>-1</sup> )                                         | 2.812                                                             | 4.871                                                                            | 4.173                                                                                          |
| Rfls. collected/unique/observed                                                    | 21169/2803/2218                                                   | 64428/8688/6895                                                                  | 53275/3348/2635                                                                                |
| <i>R</i> <sub>int</sub>                                                            | 0.0607                                                            | 0.0749                                                                           | 0.0784                                                                                         |
| Final <i>R</i> 1 <sup>a</sup> , <i>wR</i> 2 <sup>b</sup> ( <i>I</i> ≥ 2 $\sigma$ ) | 0.0398, 0.1051                                                    | 0.0630, 0.1915                                                                   | 0.0345, 0.0787                                                                                 |
| Goodness-of-fit on <i>F</i> <sup>2</sup>                                           | 1.042                                                             | 0.722                                                                            | 1.074                                                                                          |

$$^a R = \sum ||F_o| - |F_c|| / \sum |F_o|; ^b wR(F^2) = [\sum w(|F_o|^2 - |F_c|^2)^2 / \sum w|F_o|^4]^{1/2}.$$

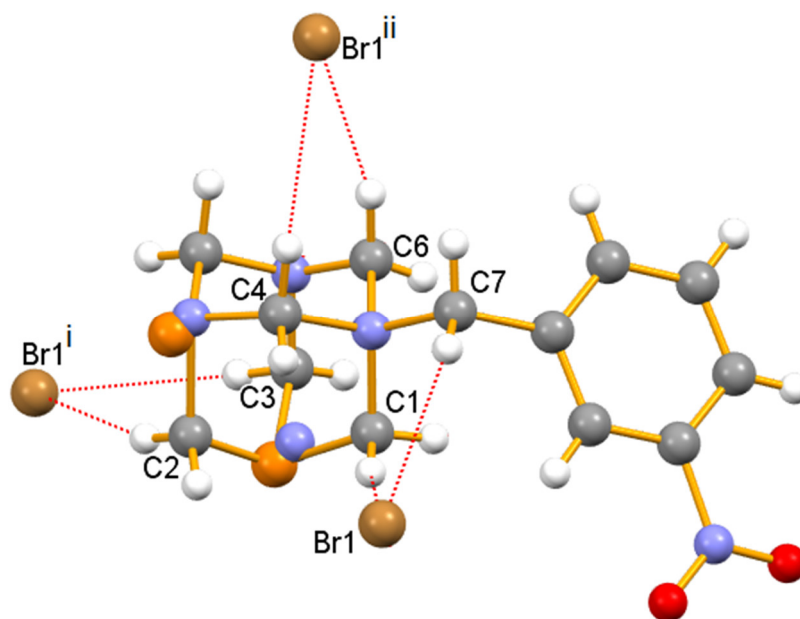

**Figure S67.** Intermolecular interactions between the cation and anion moieties of compound **2** (i: -1/2-x, 1/2+y, 1.5-z, ii: 1/2-x, 1/2+y, 1.5-z).

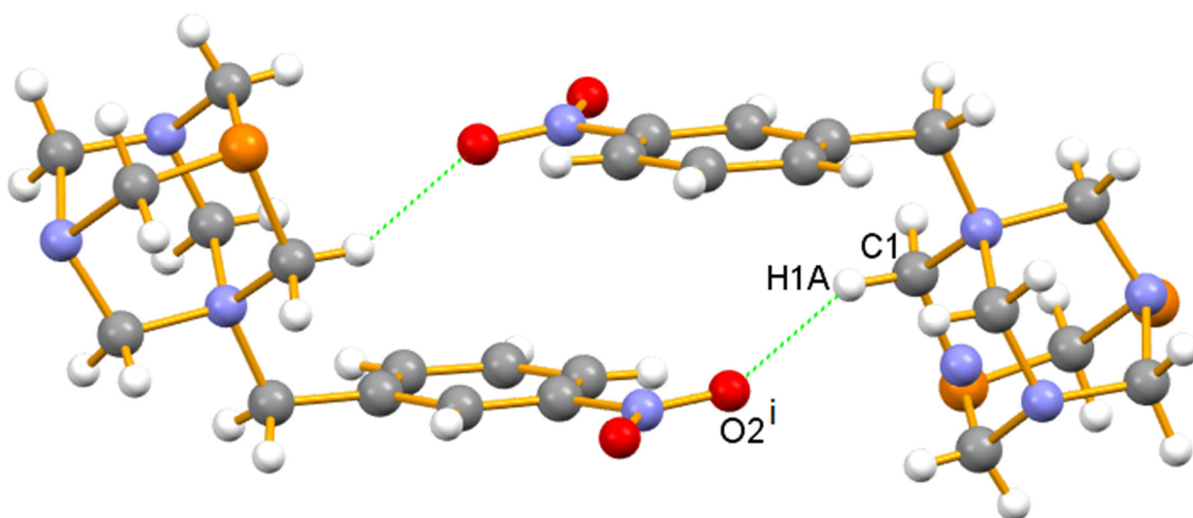

**Figure S68.** Intermolecular hydrogen bonding between two cations of compound **2** (i: -x,-y,1-z).

### 3. Plausible Anchorage of Cationic Cu(I) Complexes $[\text{CuBr}_2(\text{PTA-CH}_2\text{-}m\text{-NO}_2\text{-C}_6\text{H}_4)_2]^+$ on Carbon Materials

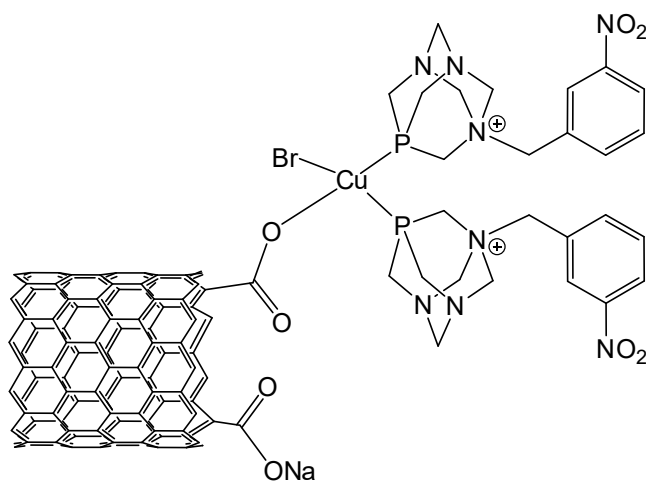

**Figure S69.** Coordination at the Cu centre through a carboxylate group upon replacement of a bromo ligand.



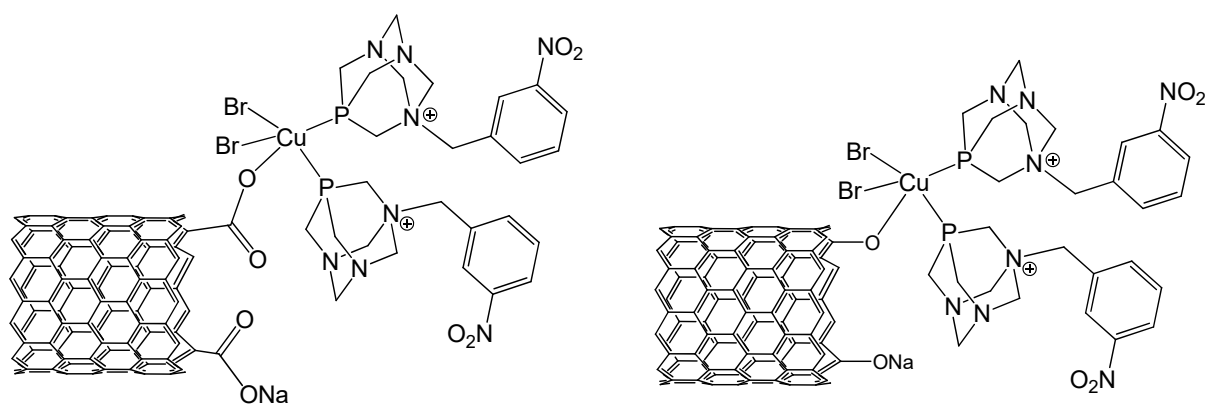

**Figure S70.** Coordination at the Cu centre through a carboxylate or a phenolate group.

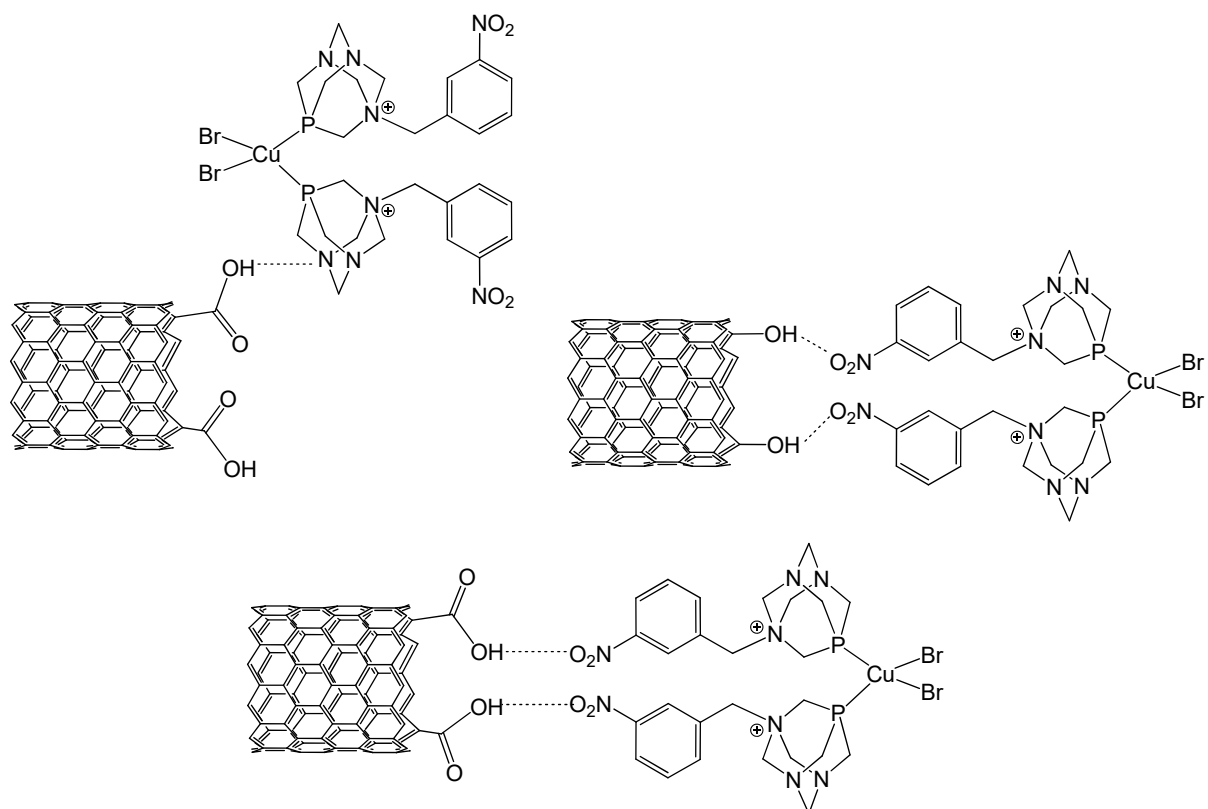

**Figure S71.** Via hydrogen bonding from a carboxylic or phenolic group.

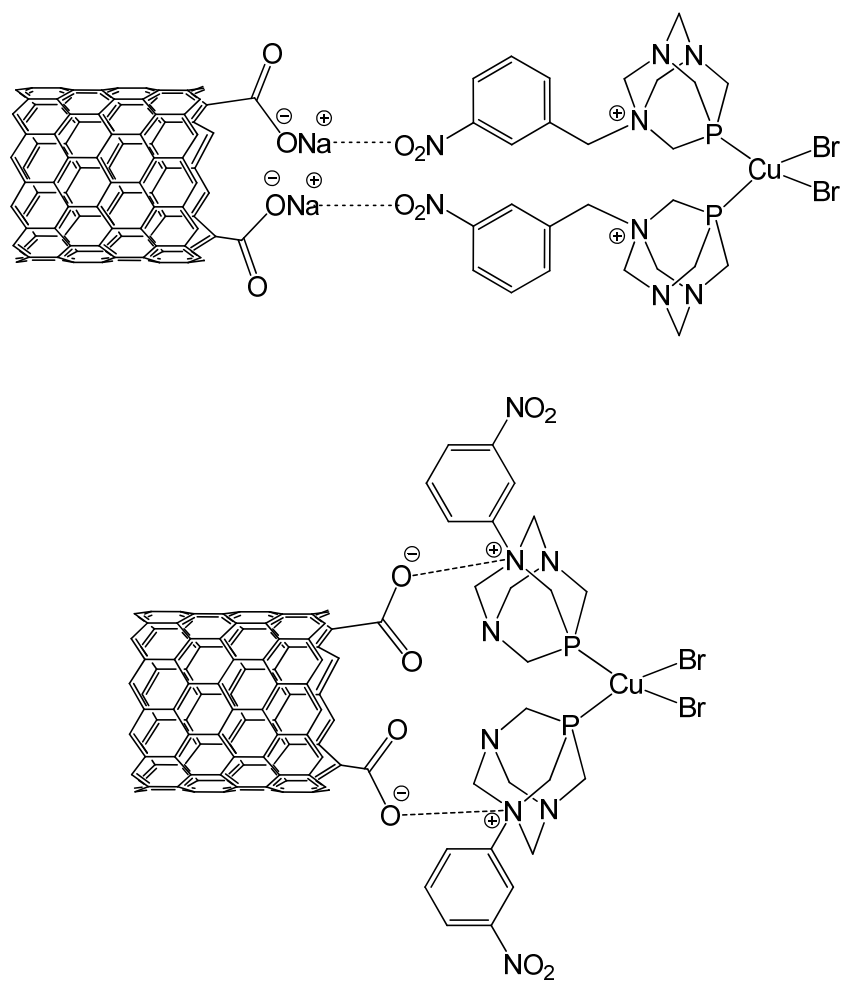

**Figure S72.** Via ionic interactions.

#### 4. FTIR Spectra of CNT-ox-Na Materials (2000–400 $\text{cm}^{-1}$ )

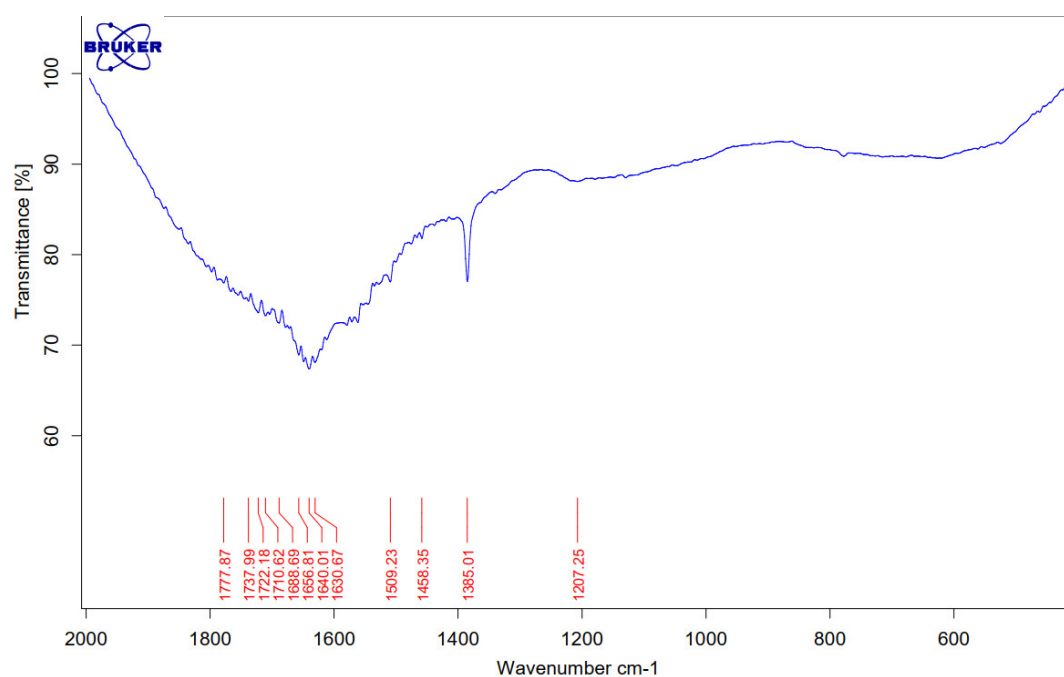

Figure S73. FTIR spectrum of CNT-ox-Na support.

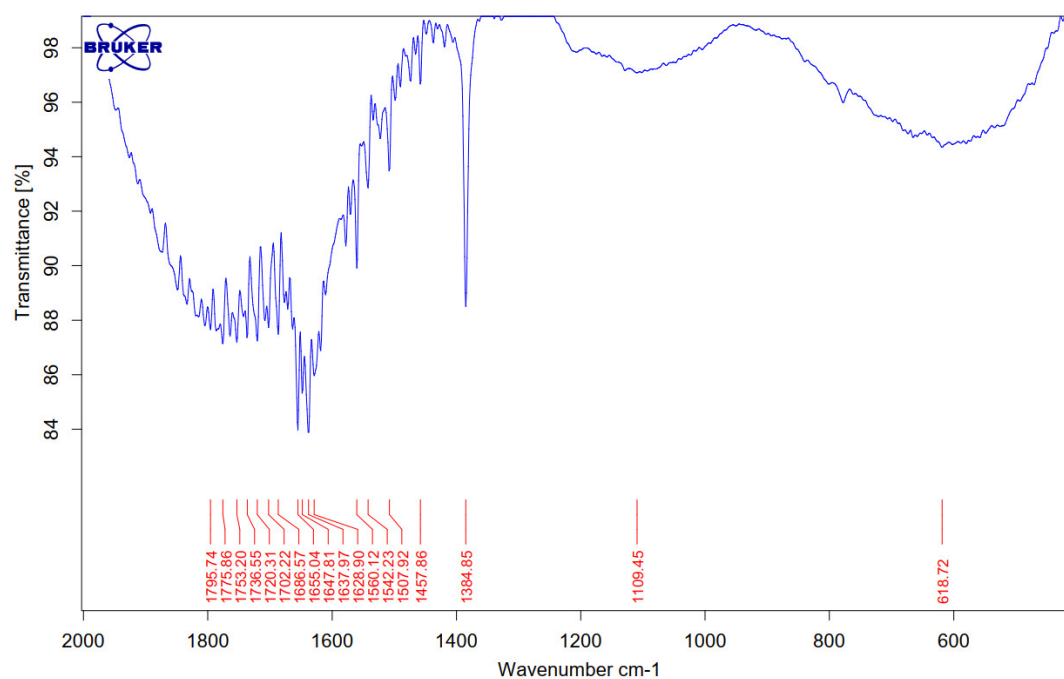

Figure S74. FTIR spectrum of 5a\_CNT-ox-Na.

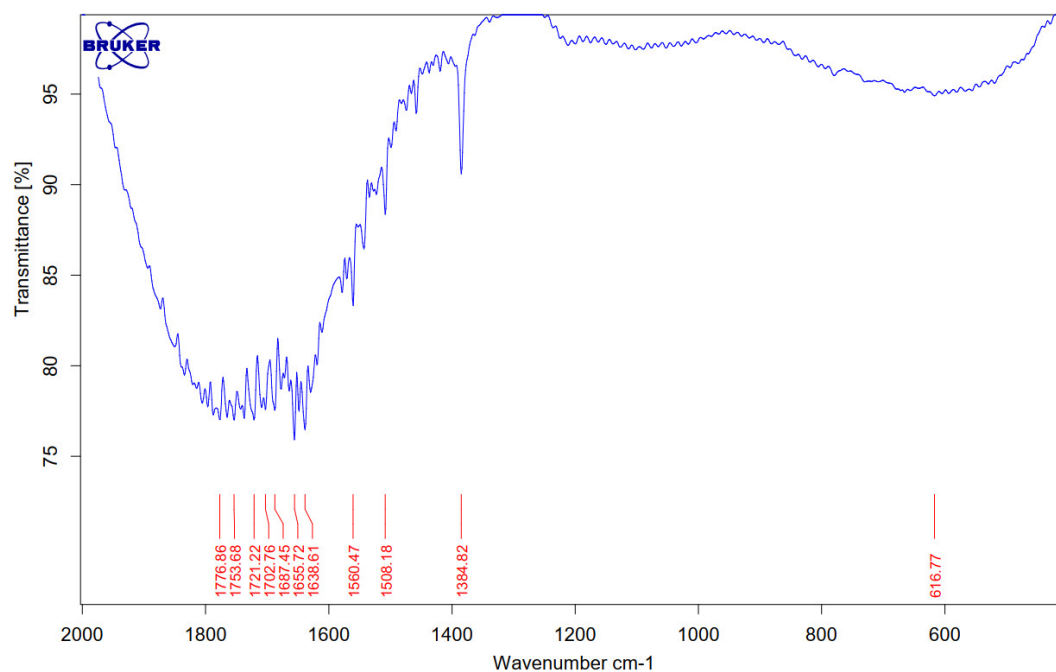

**Figure S75.** FTIR spectrum of **5b**\_CNT-ox-Na.

## 5. NMR Spectra of Triazole Products

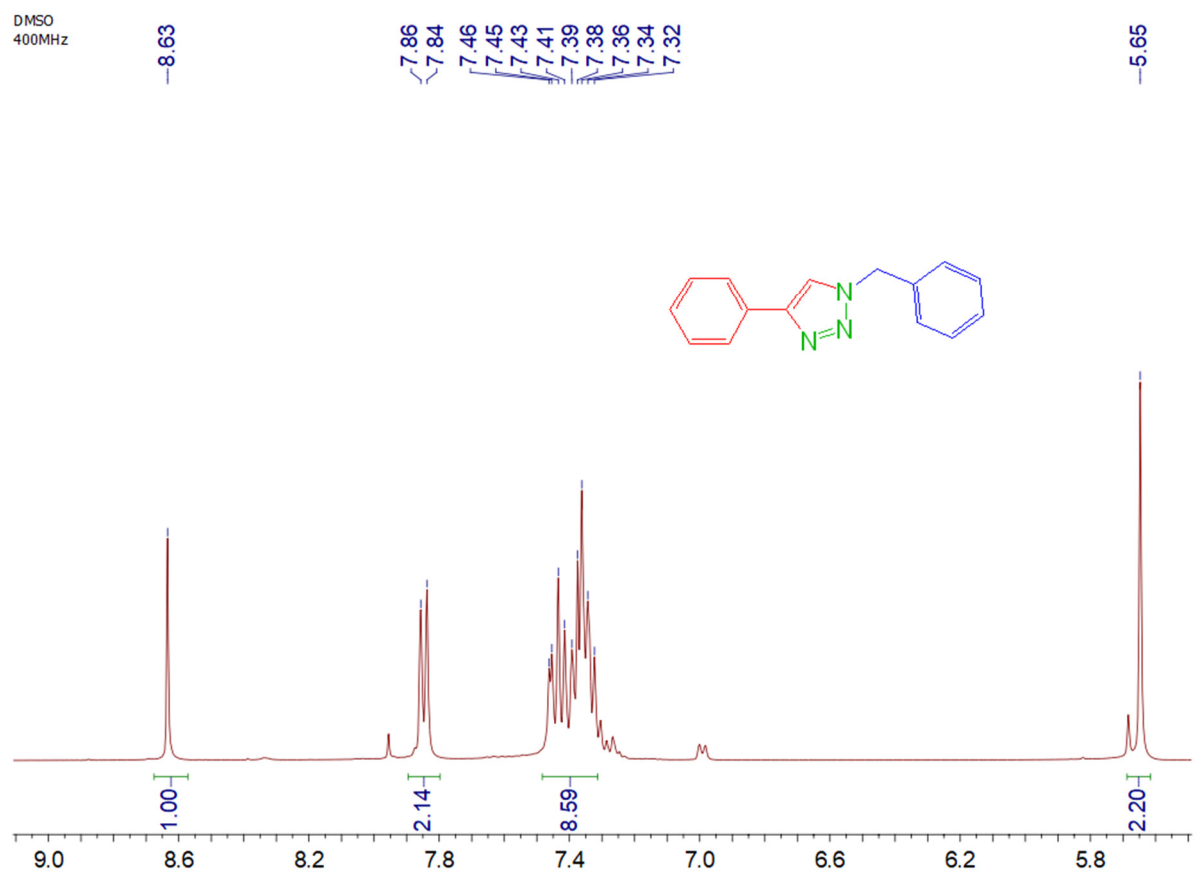

Figure S76.  $^1\text{H}$  NMR spectrum of 1-benzyl-4-phenyl-1H-1,2,3-triazole.

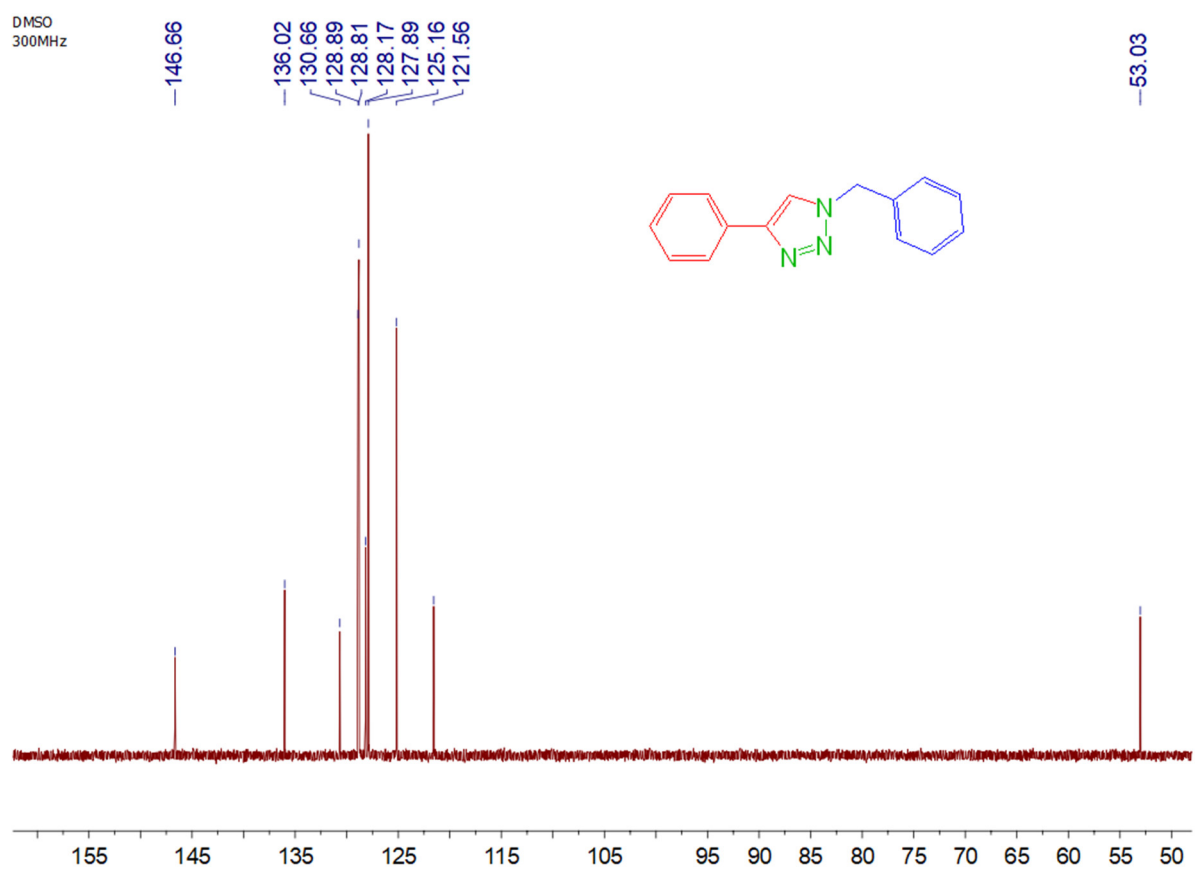

Figure S77.  $^{13}\text{C}$  NMR spectrum of 1-benzyl-4-phenyl-1H-1,2,3-triazole.

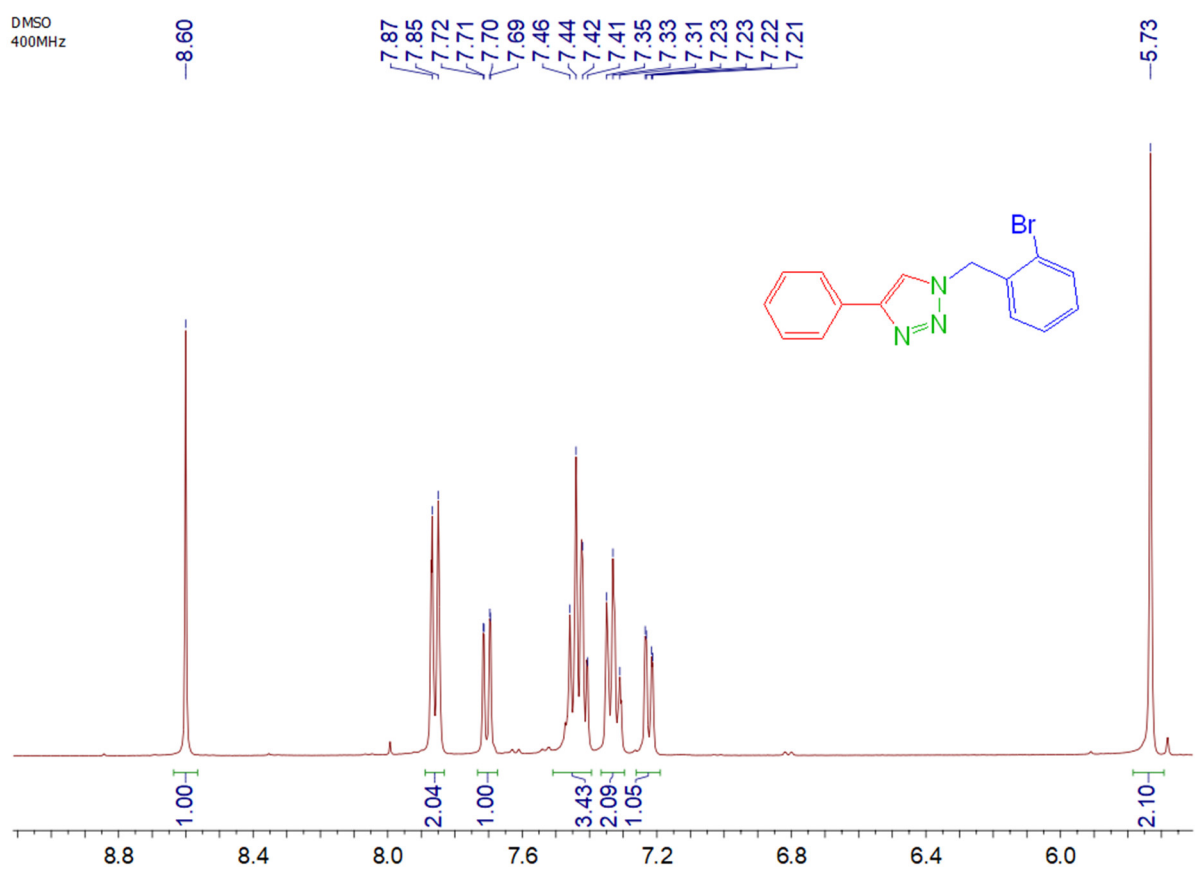

**Figure S78.**  $^1\text{H}$  NMR spectrum of 1-(2-bromobenzyl)-4-phenyl-1H-1,2,3-triazole.

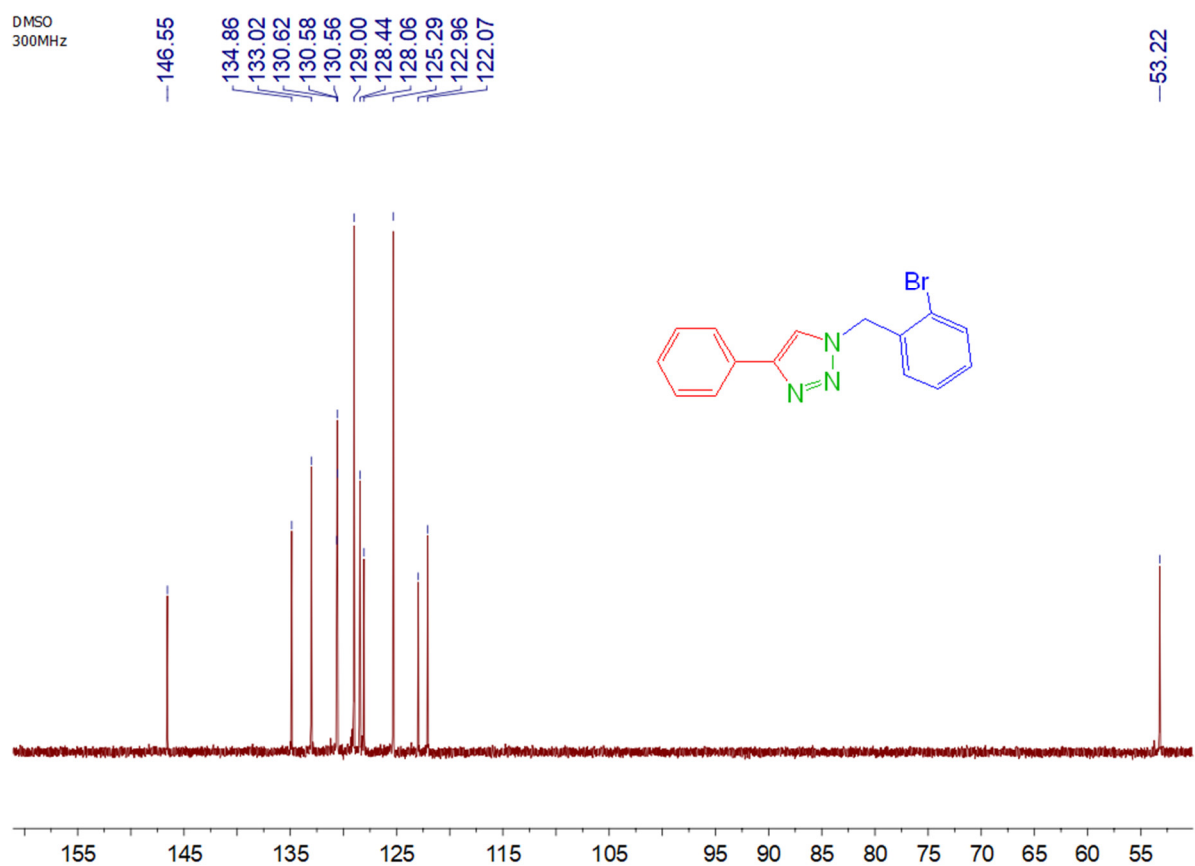

**Figure S79.**  $^{13}\text{C}$  NMR spectrum of 1-(2-bromobenzyl)-4-phenyl-1H-1,2,3-triazole.



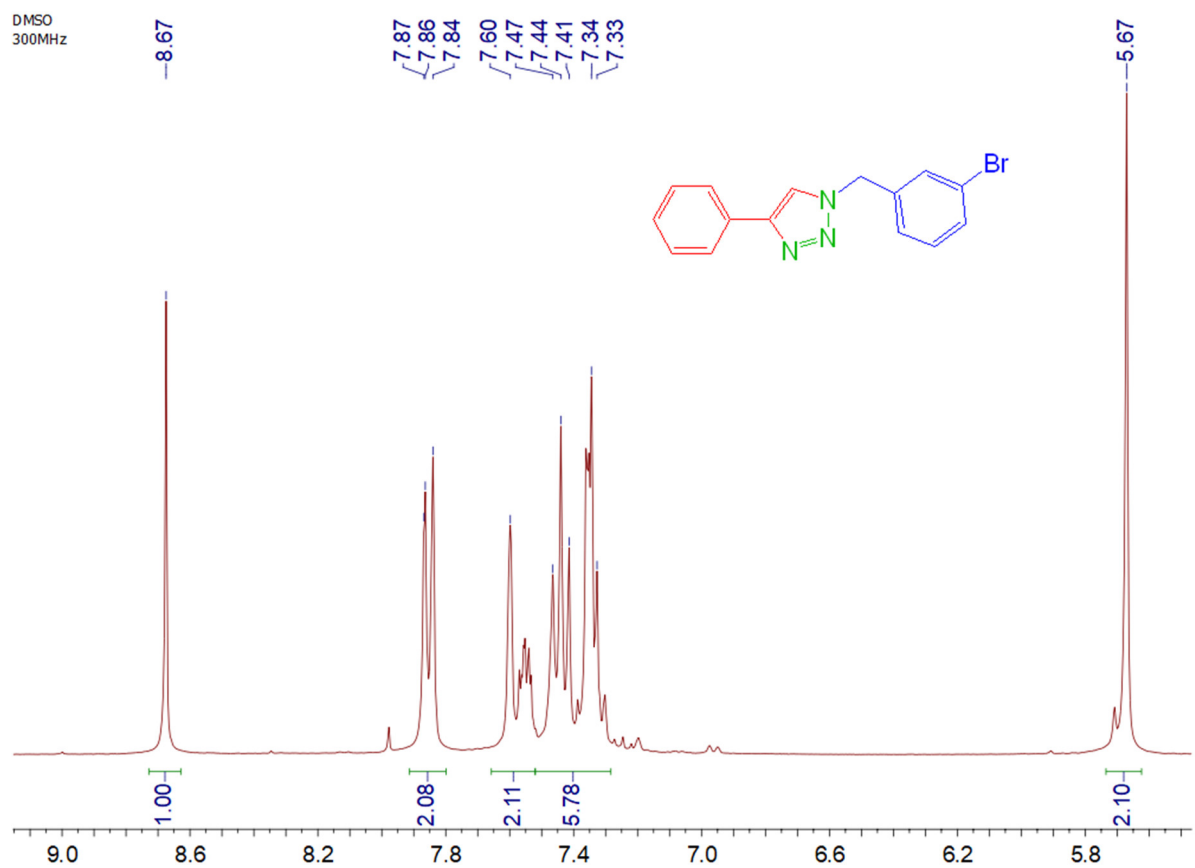

**Figure S80.**  $^1\text{H}$  NMR spectrum of 1-(3-bromobenzyl)-4-phenyl-1H-1,2,3-triazole.

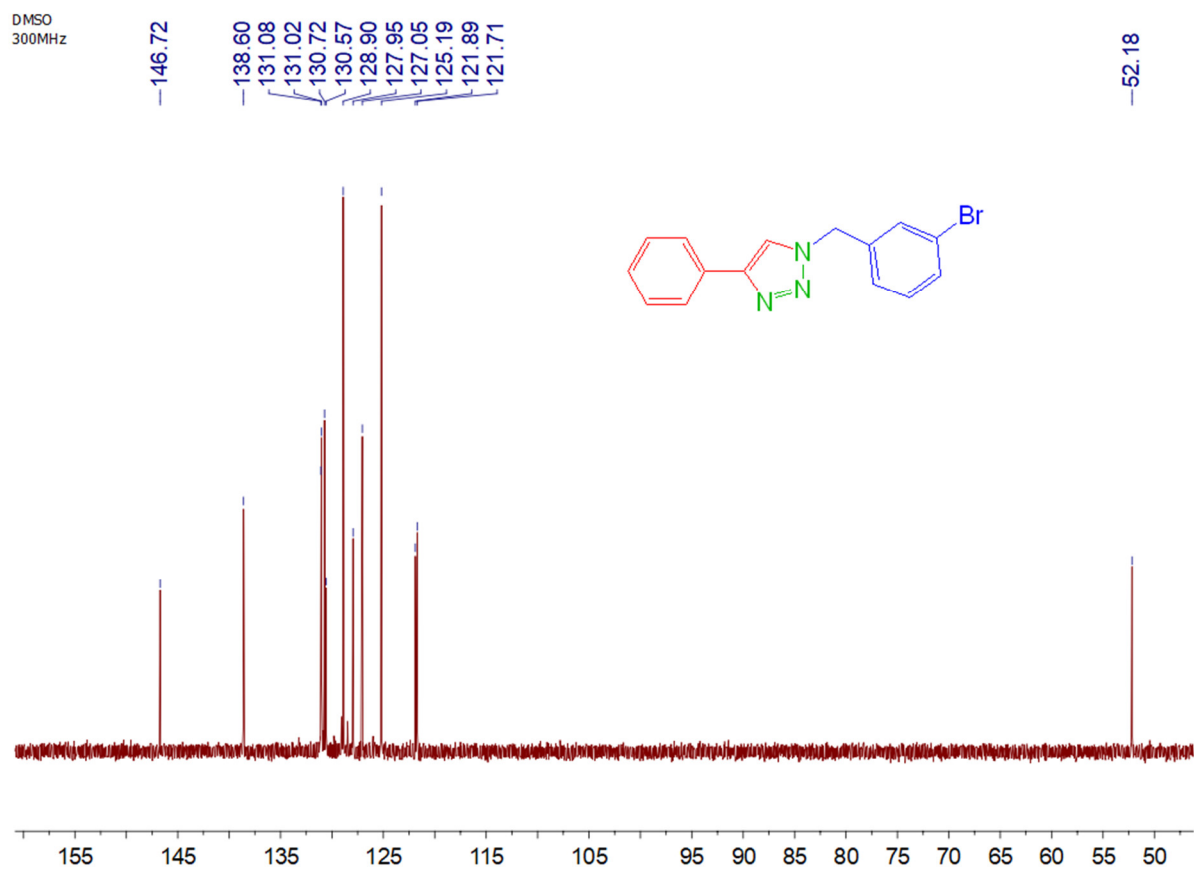

**Figure S81.**  $^{13}\text{C}$  NMR spectrum of 1-(3-bromobenzyl)-4-phenyl-1H-1,2,3-triazole.

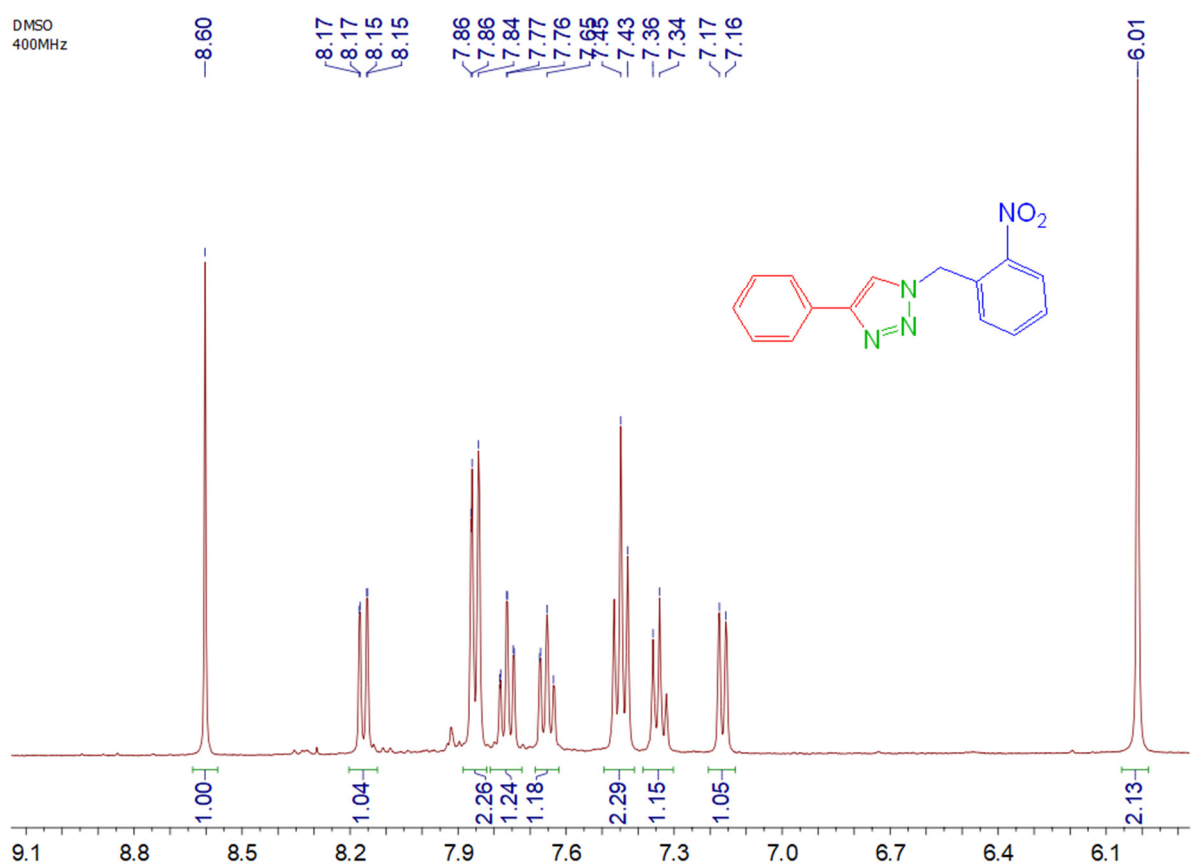

Figure S82.  $^1\text{H}$  NMR spectrum of 1-(2-nitrobenzyl)-4-phenyl-1H-1,2,3-triazole.

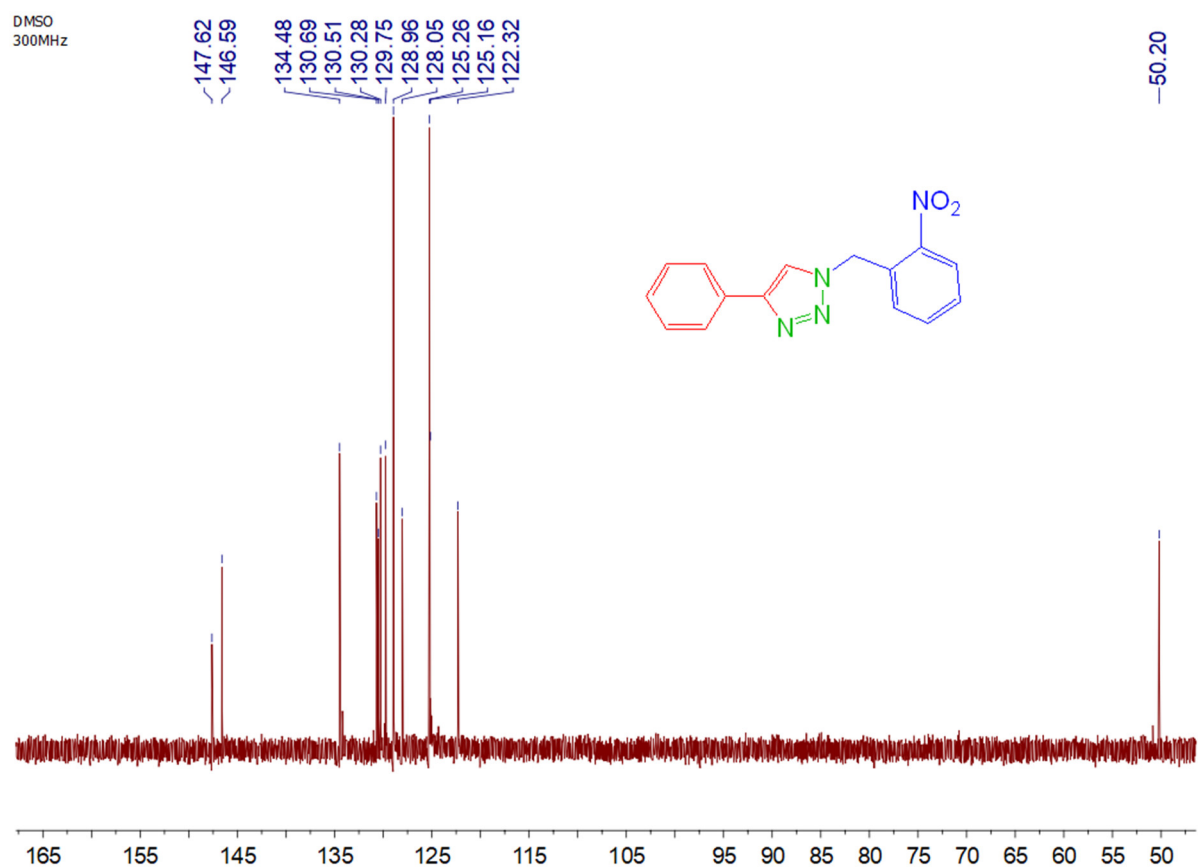

Figure S83.  $^{13}\text{C}$  NMR spectrum of 1-(2-nitrobenzyl)-4-phenyl-1H-1,2,3-triazole.

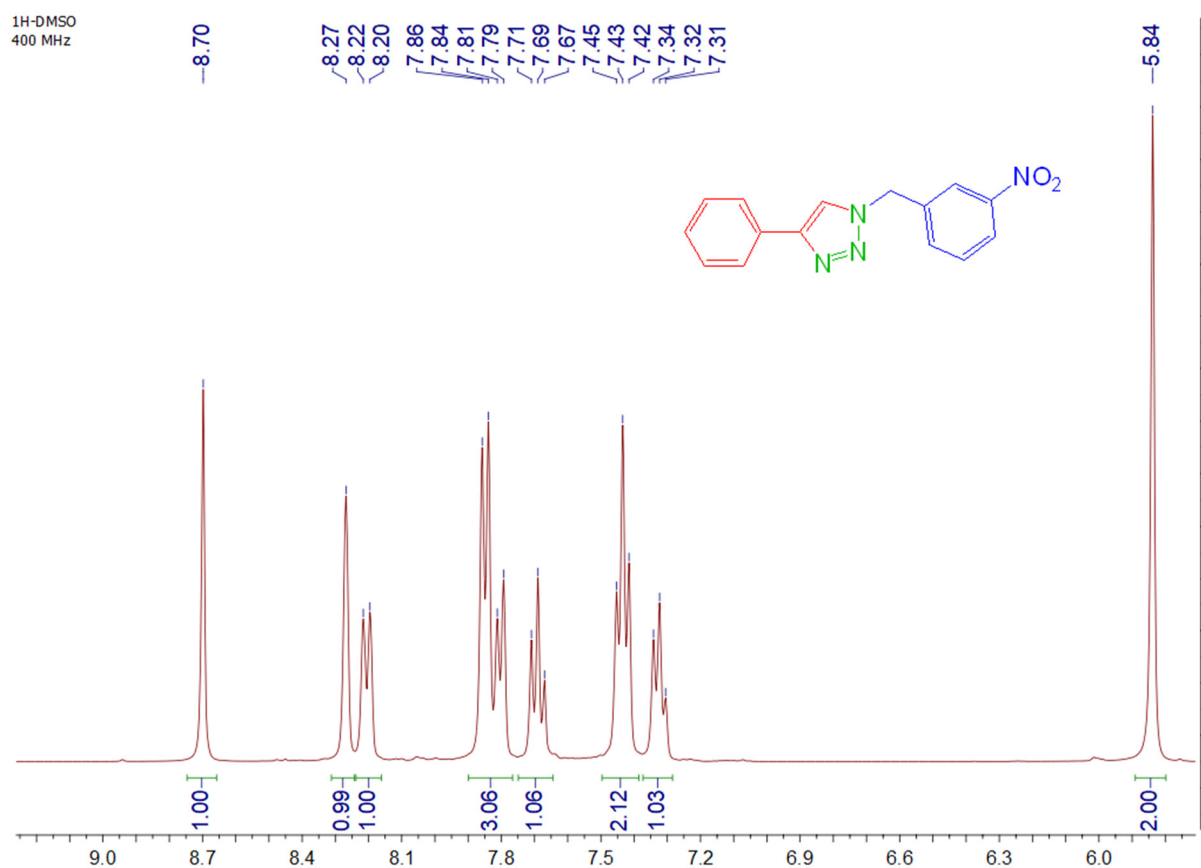

**Figure S84.** <sup>1</sup>H NMR spectrum of 1-(3-nitrobenzyl)-4-phenyl-1H-1,2,3-triazole.

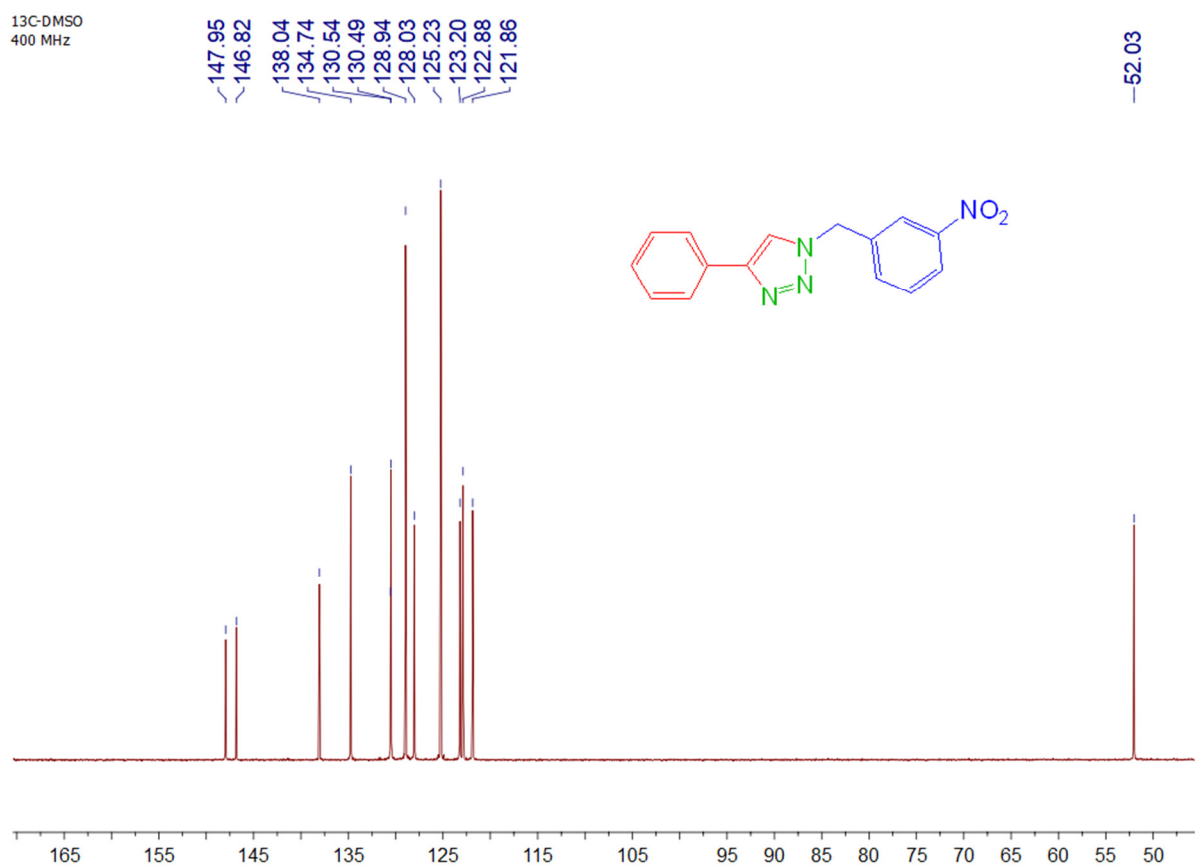

**Figure S85.** <sup>13</sup>C NMR spectrum of 1-(3-nitrobenzyl)-4-phenyl-1H-1,2,3-triazole.

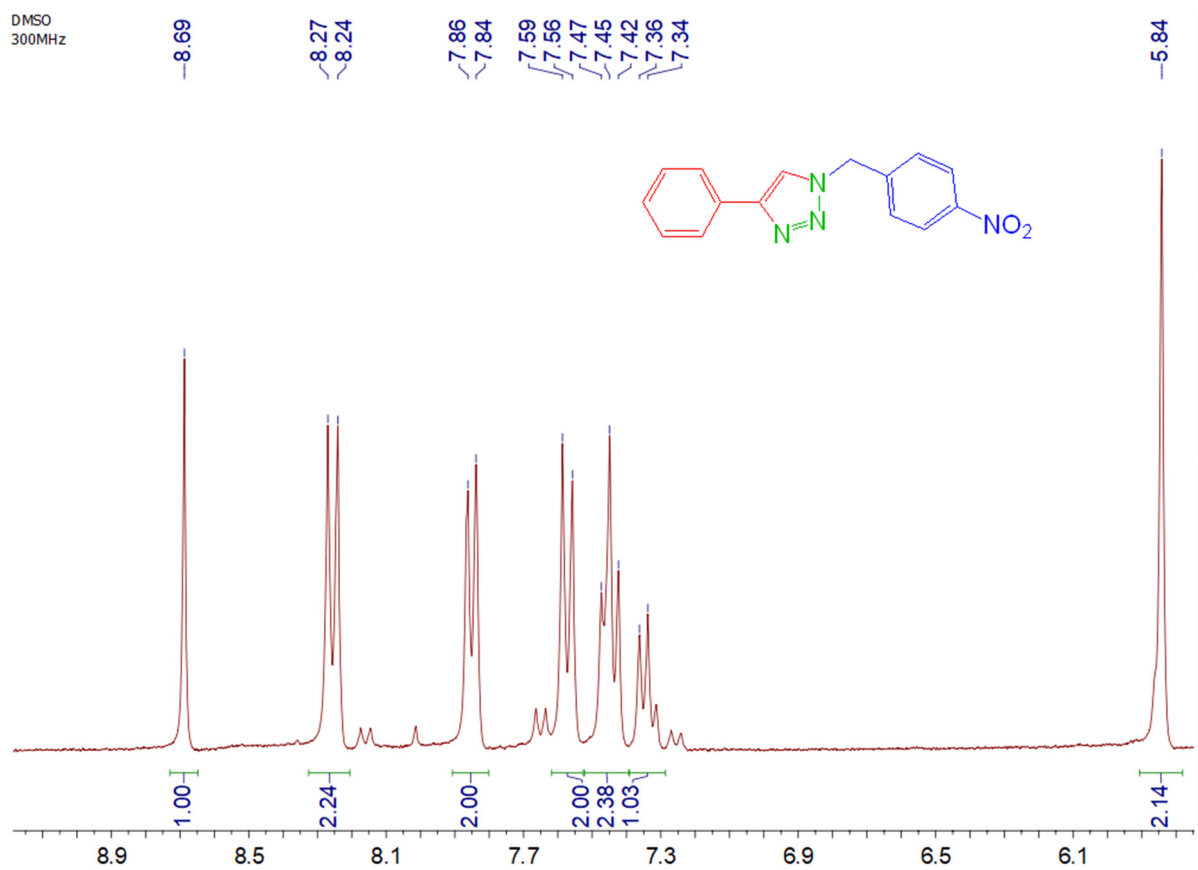

Figure S86.  $^1\text{H}$  NMR spectrum of 1-(4-nitrobenzyl)-4-phenyl-1H-1,2,3-triazole.

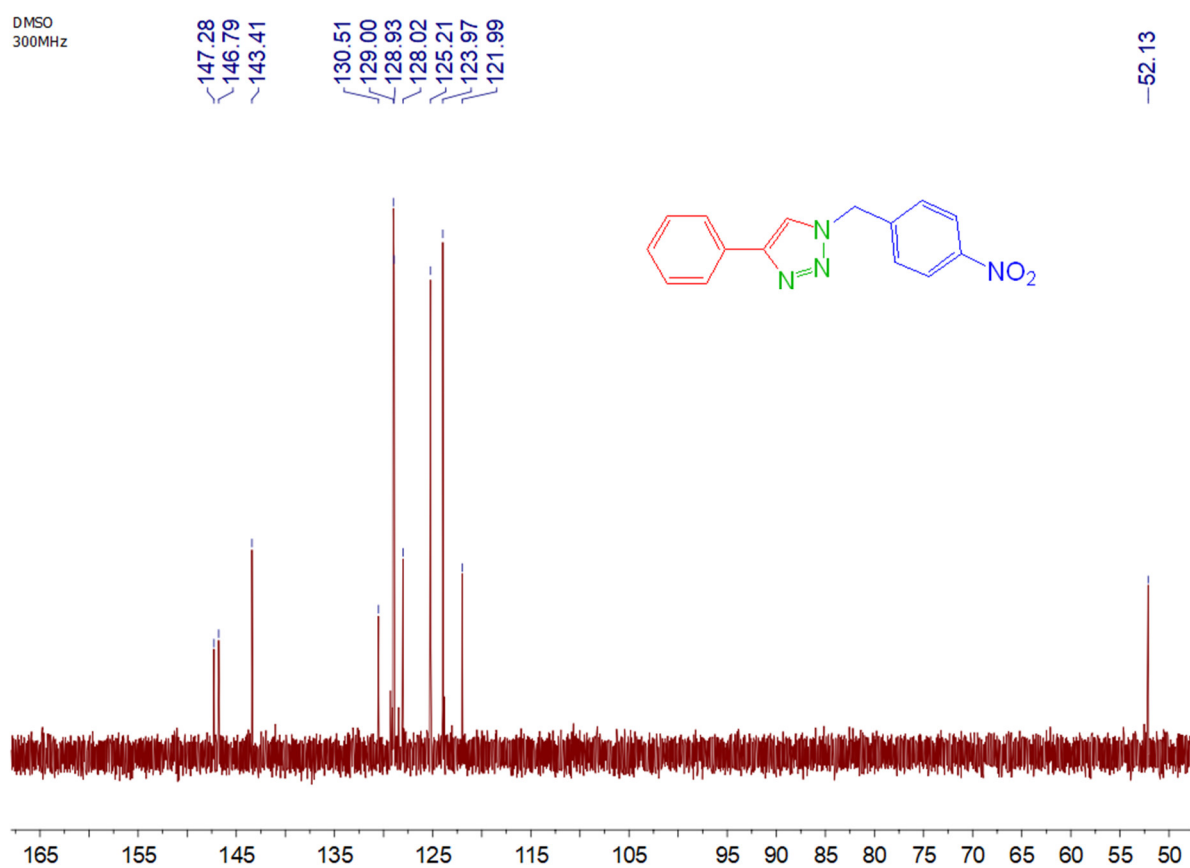

**Figure S87.**  $^{13}\text{C}$  NMR spectrum of 1-(4-nitrobenzyl)-4-phenyl-1H-1,2,3-triazole.



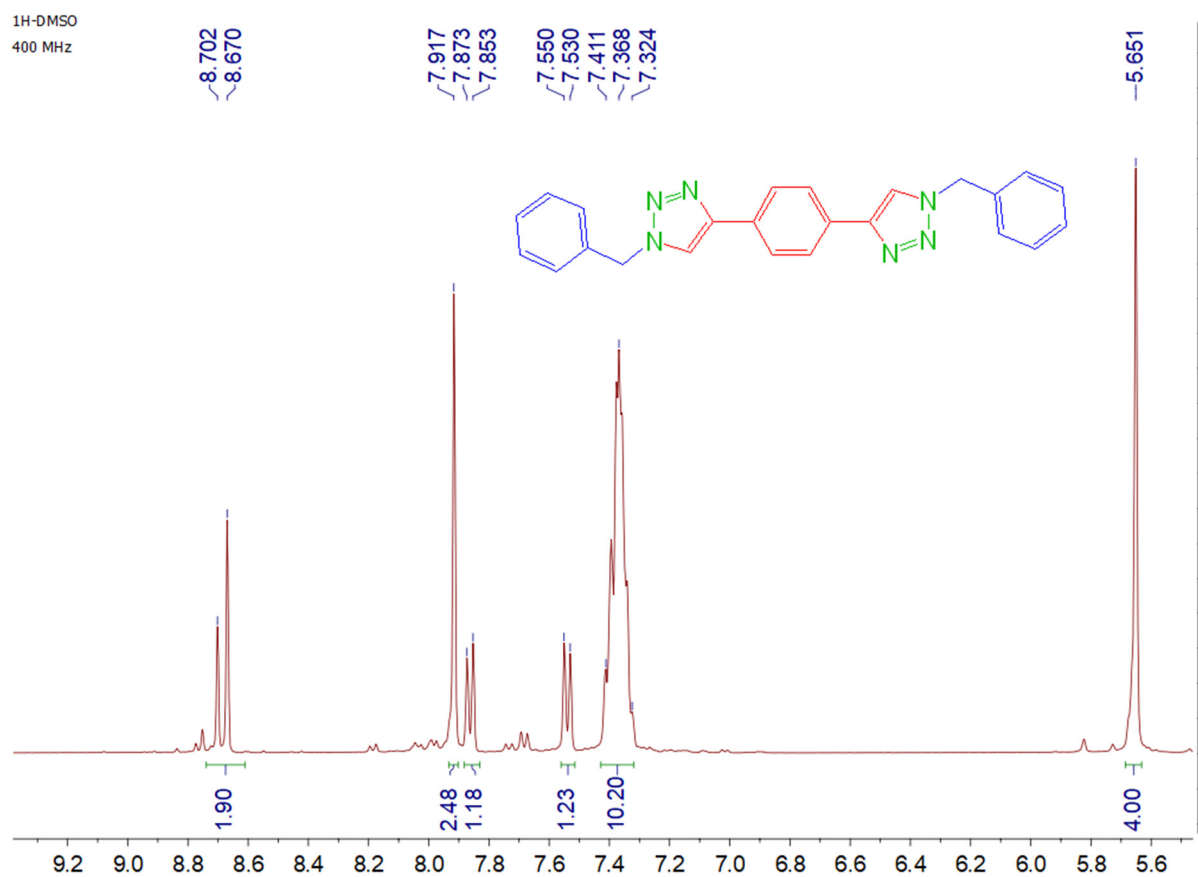

Figure S88. <sup>1</sup>H NMR spectrum of 1,4-bis(1-benzyl-1H-1,2,3-triazol-4-yl)benzene.

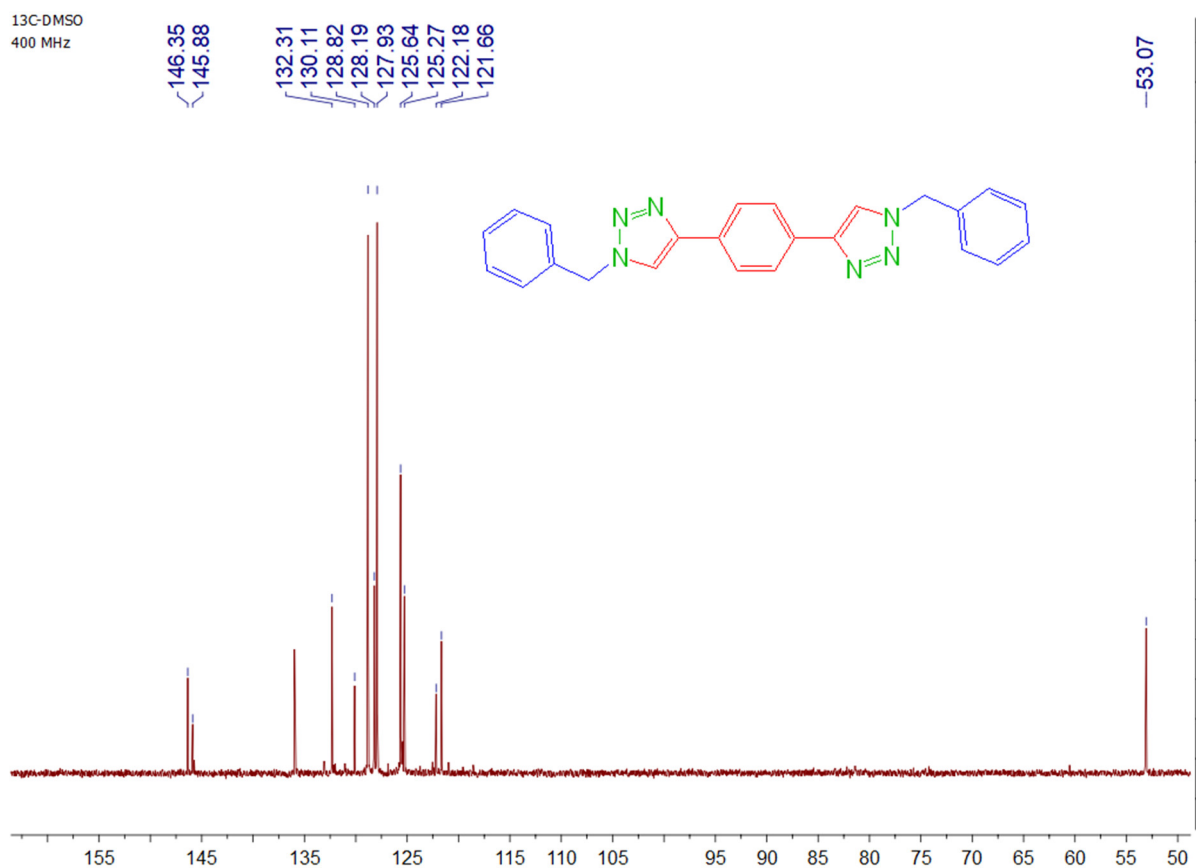

**Figure S89.** <sup>13</sup>C NMR spectrum of 1,4-bis(1-benzyl-1H-1,2,3-triazol-4-yl)benzene.

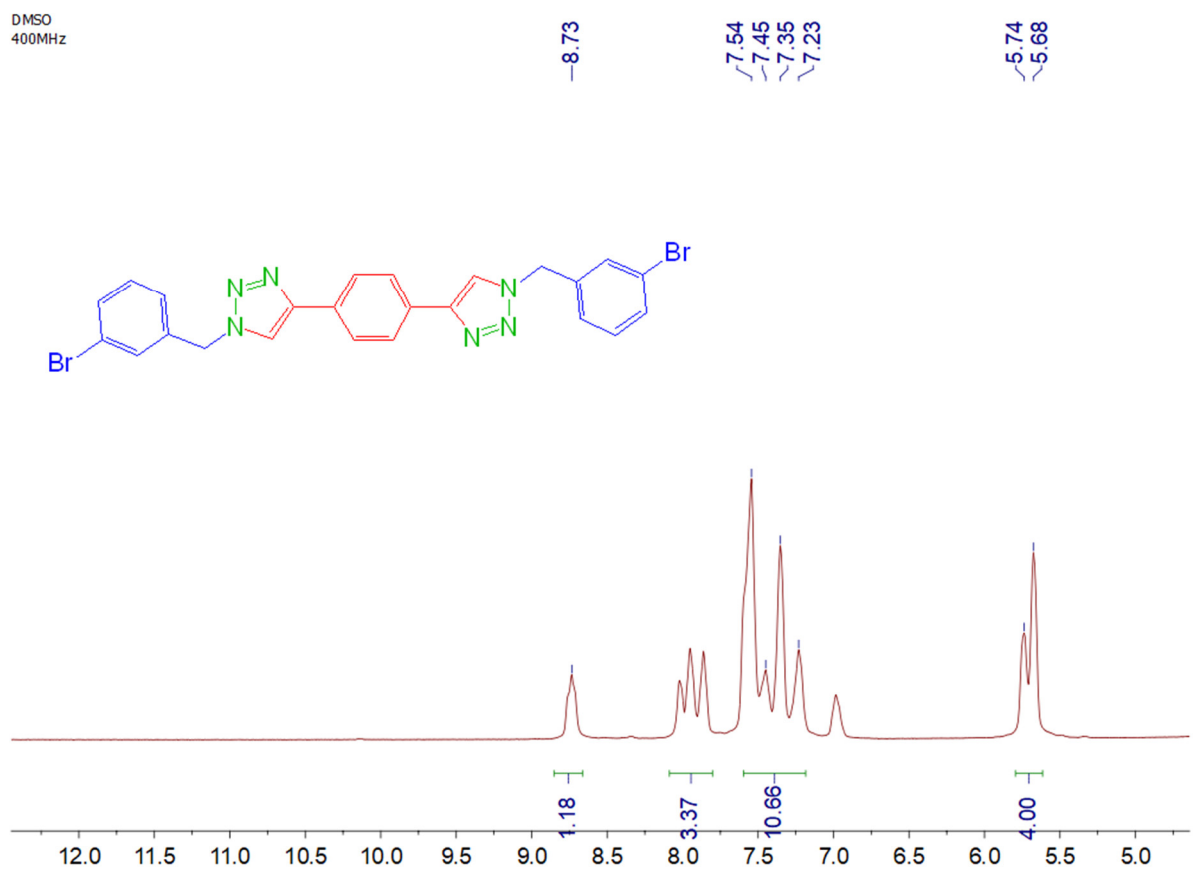

**Figure S90.** <sup>1</sup>H NMR spectrum of 1,4-bis(1-(3-bromobenzyl)-1H-1,2,3-triazol-4-yl)benzene.

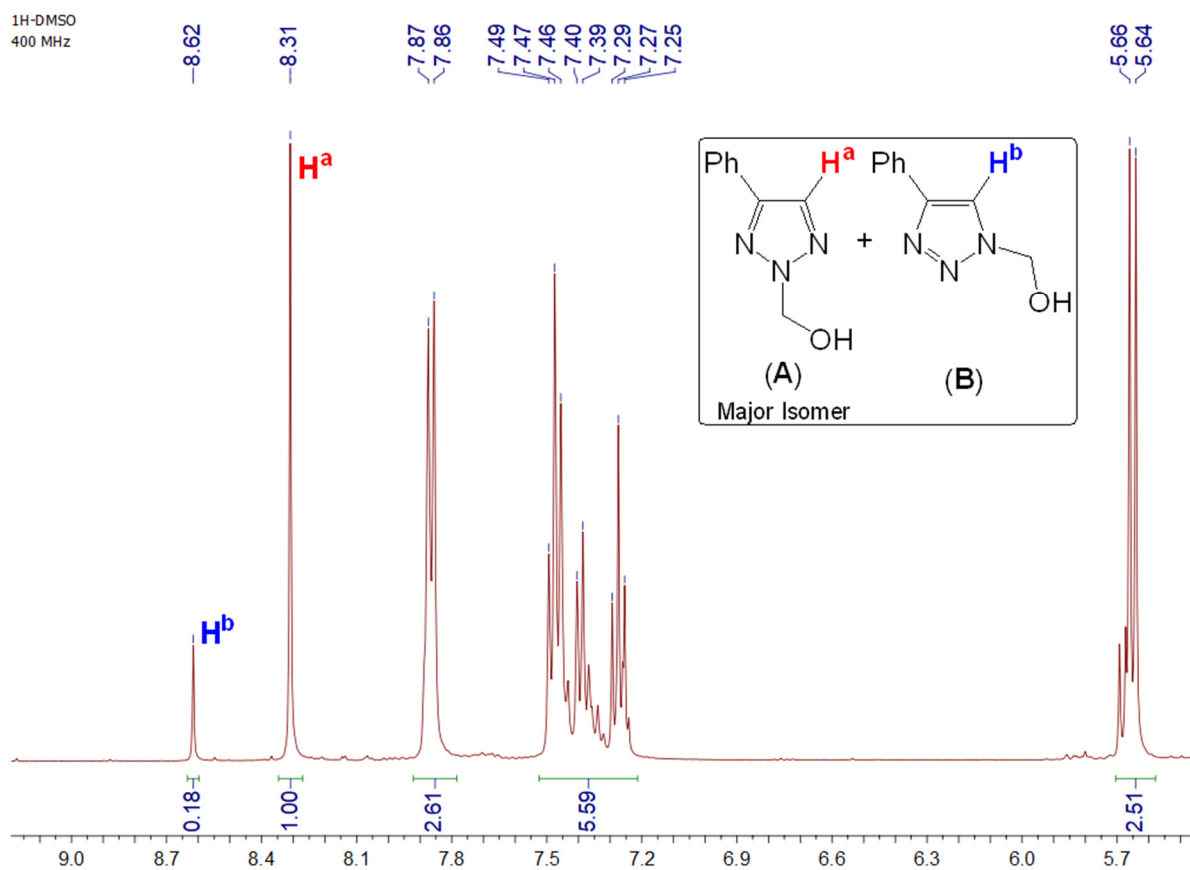

**Figure 91.**  $^1\text{H}$ -NMR spectrum ( $\text{DMSO}-d_6$ ) of 1- and 2-hydroxymethyl-4-phenyl-1,2,3-triazole regioisomeric mixture obtained from the reaction described in Table 7, entry 3.

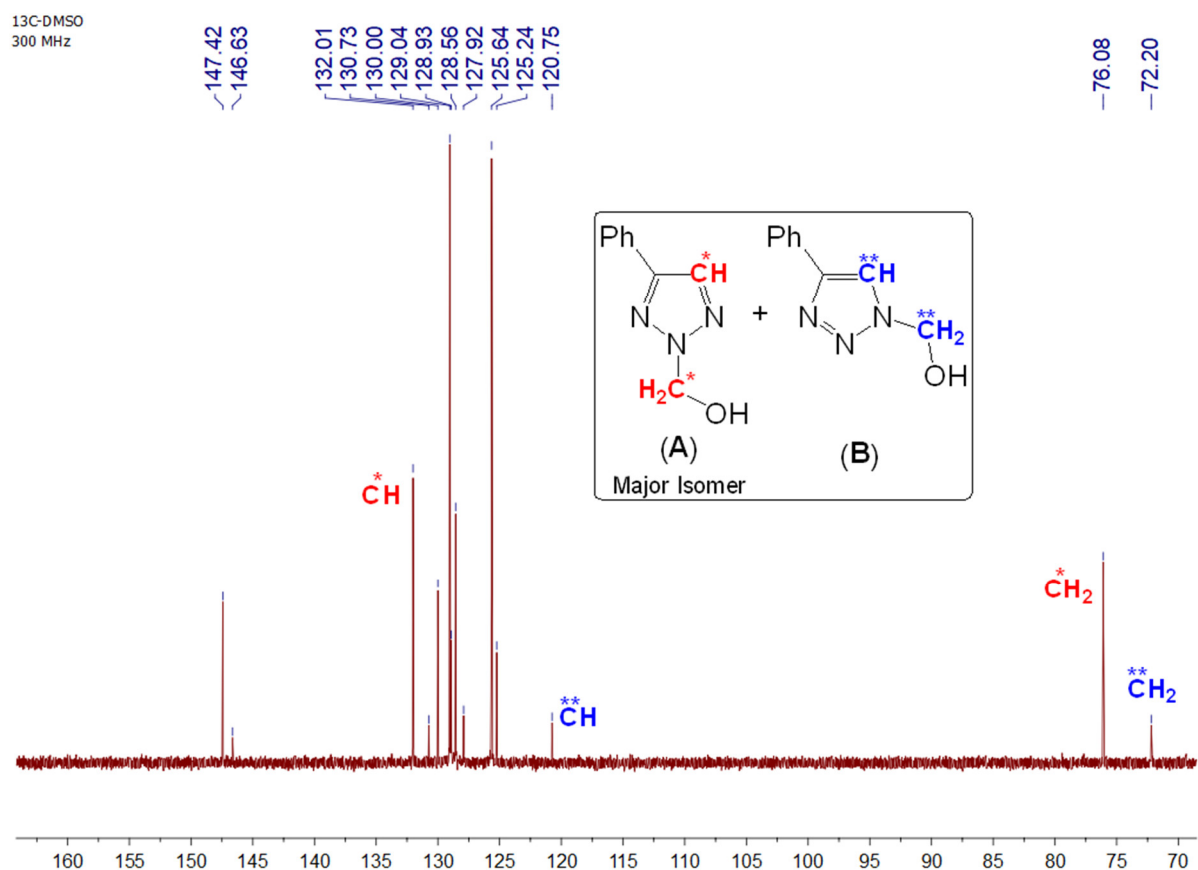

**Figure 92.** <sup>13</sup>C-NMR spectrum (DMSO-*d*<sub>6</sub>) of 1- and 2-hydroxymethyl-4-phenyl-1,2,3-triazole regioisomeric mixture obtained from the reaction described in Table 7, entry 3.

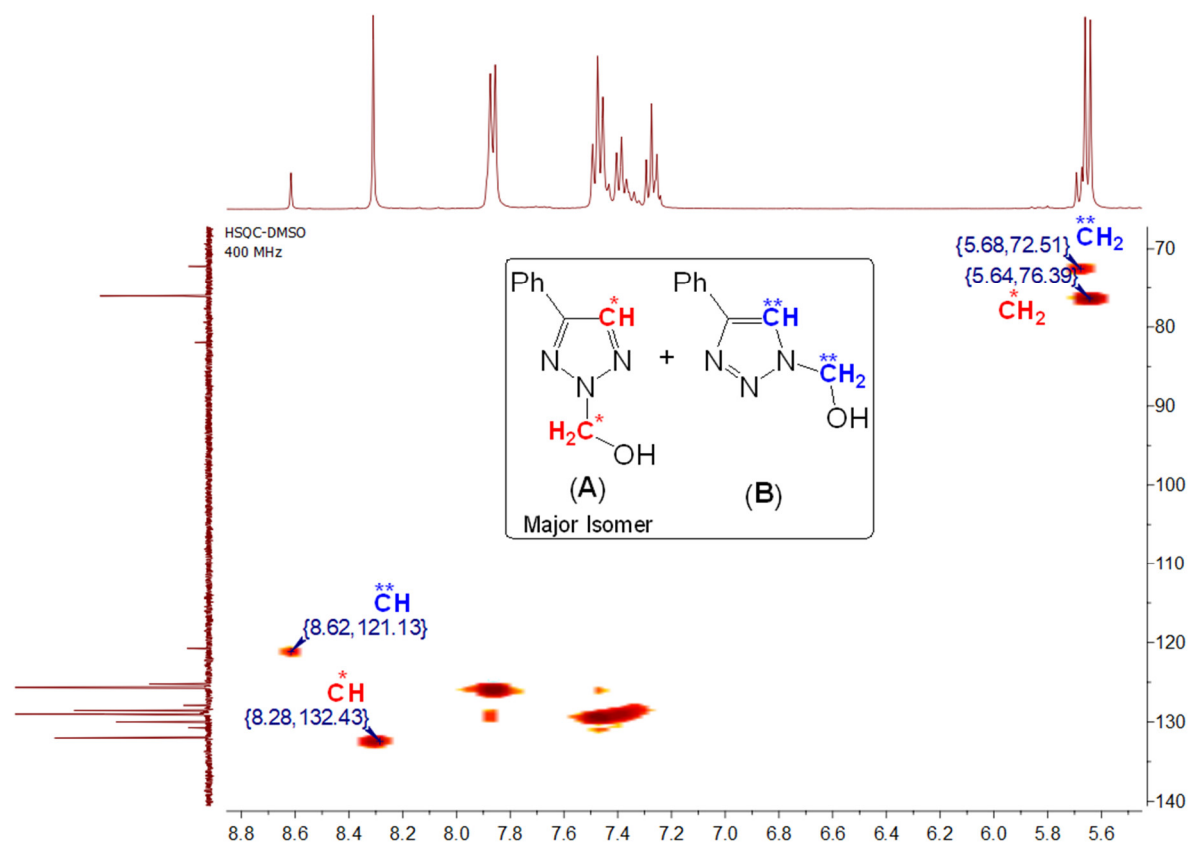

**Figure 93.** HSQC spectrum (DMSO-*d*<sub>6</sub>) of 1- and 2-hydroxymethyl-4-phenyl-1,2,3-triazole regioisomeric mixture obtained from the reaction described in Table 7, entry 3.

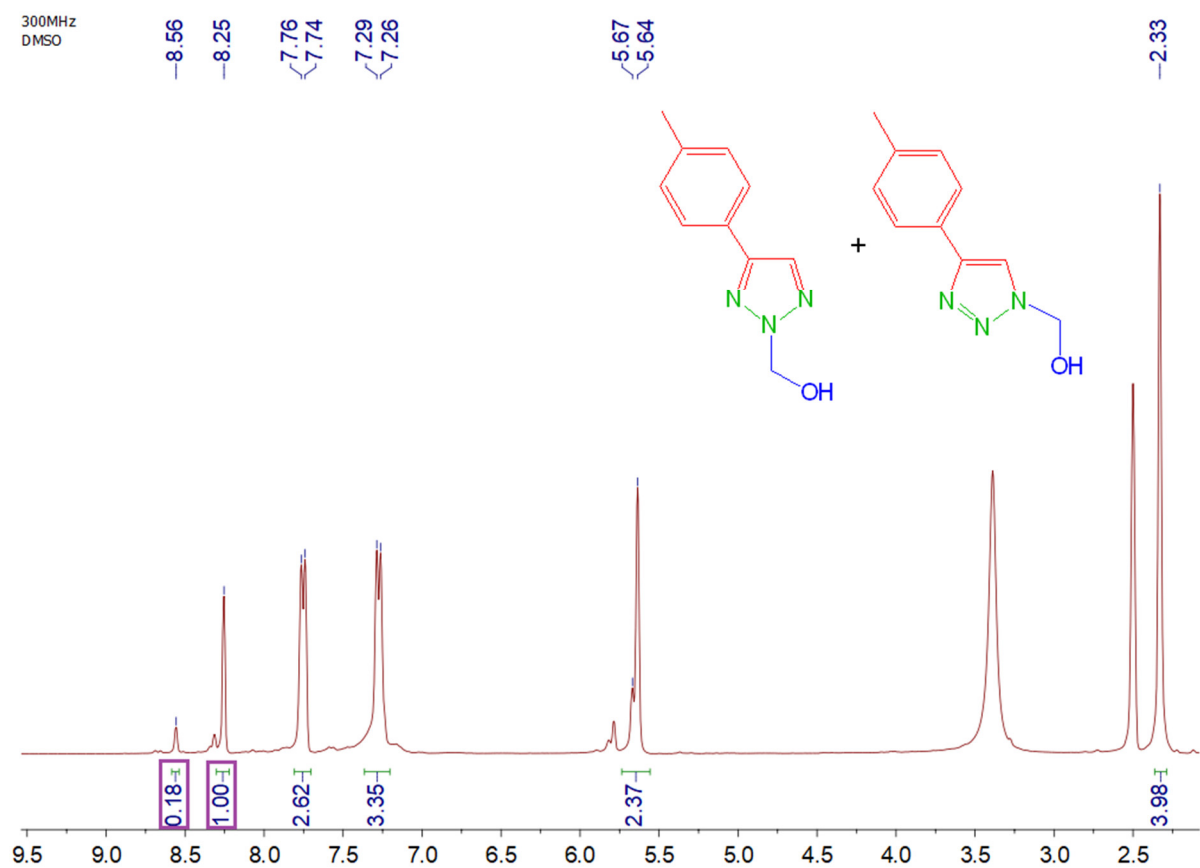

**Figure S94.**  $^1\text{H}$  NMR spectrum of (4-(*p*-tolyl)-2*H*-1,2,3-triazol-2-yl)methanol (the major isomer).

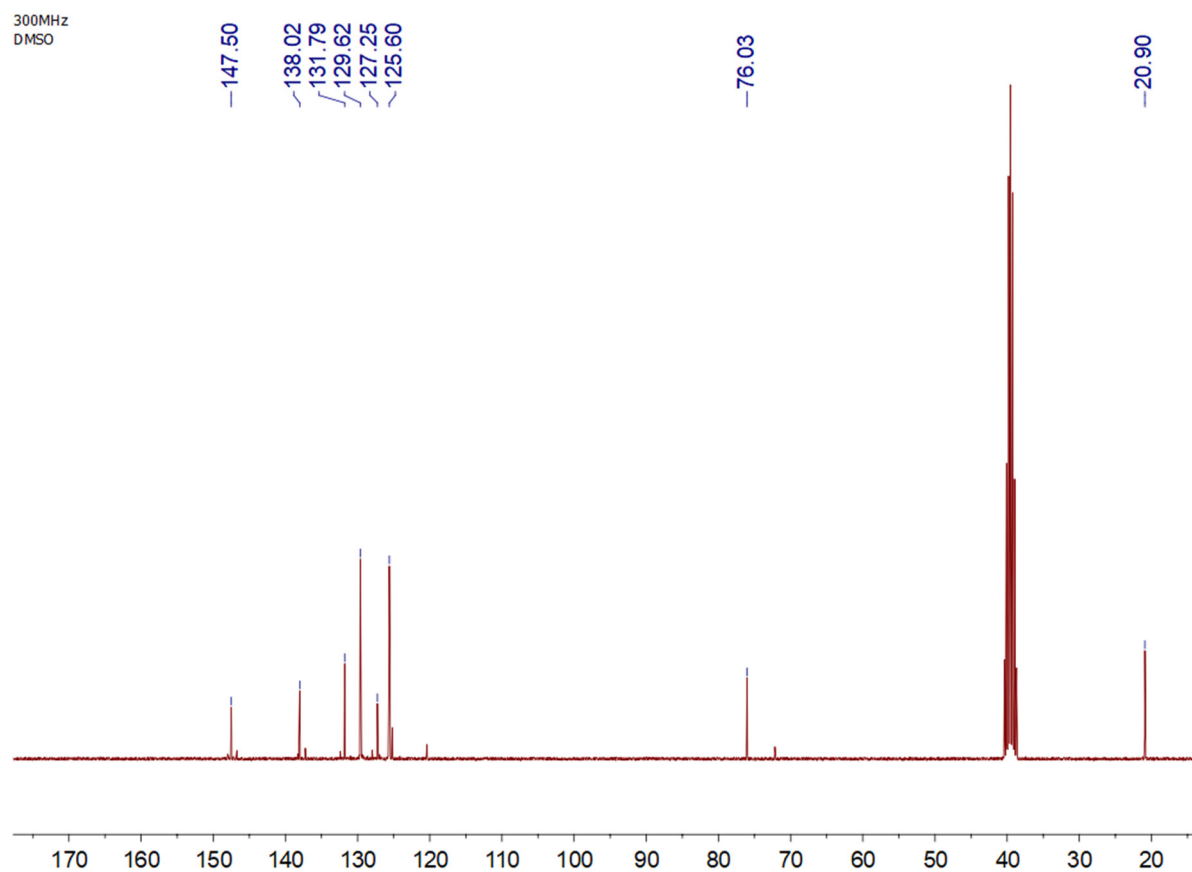

**Figure S95.**  $^{13}\text{C}$  NMR spectrum of (4-(*p*-tolyl)-2*H*-1,2,3-triazol-2-yl)methanol (the major isomer).

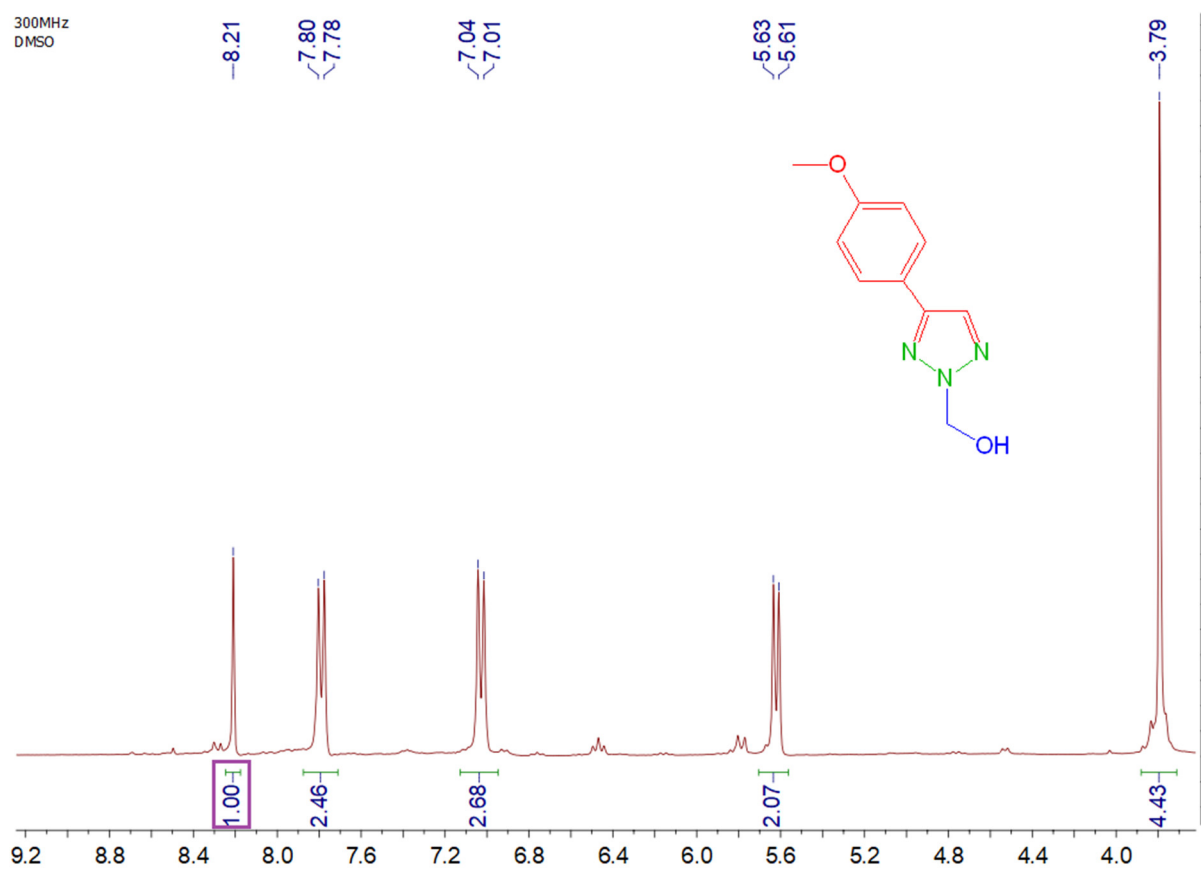

**Figure S96.**  $^1\text{H}$  NMR spectrum of (4-(4-methoxyphenyl)-2H-1,2,3-triazol-2-yl)methanol.



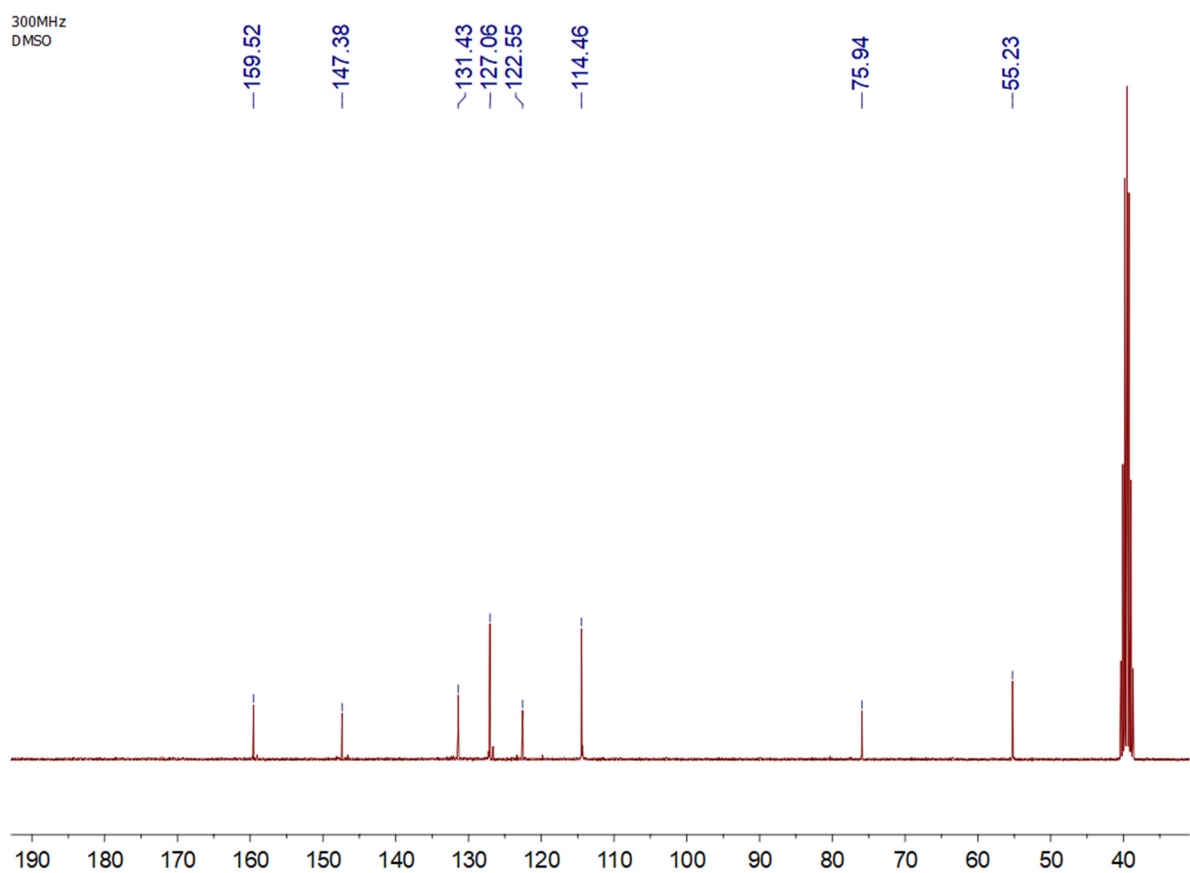

**Figure S97.**  $^{13}\text{C}$  NMR spectrum of (4-(4-methoxyphenyl)-2H-1,2,3-triazol-2-yl)methanol.

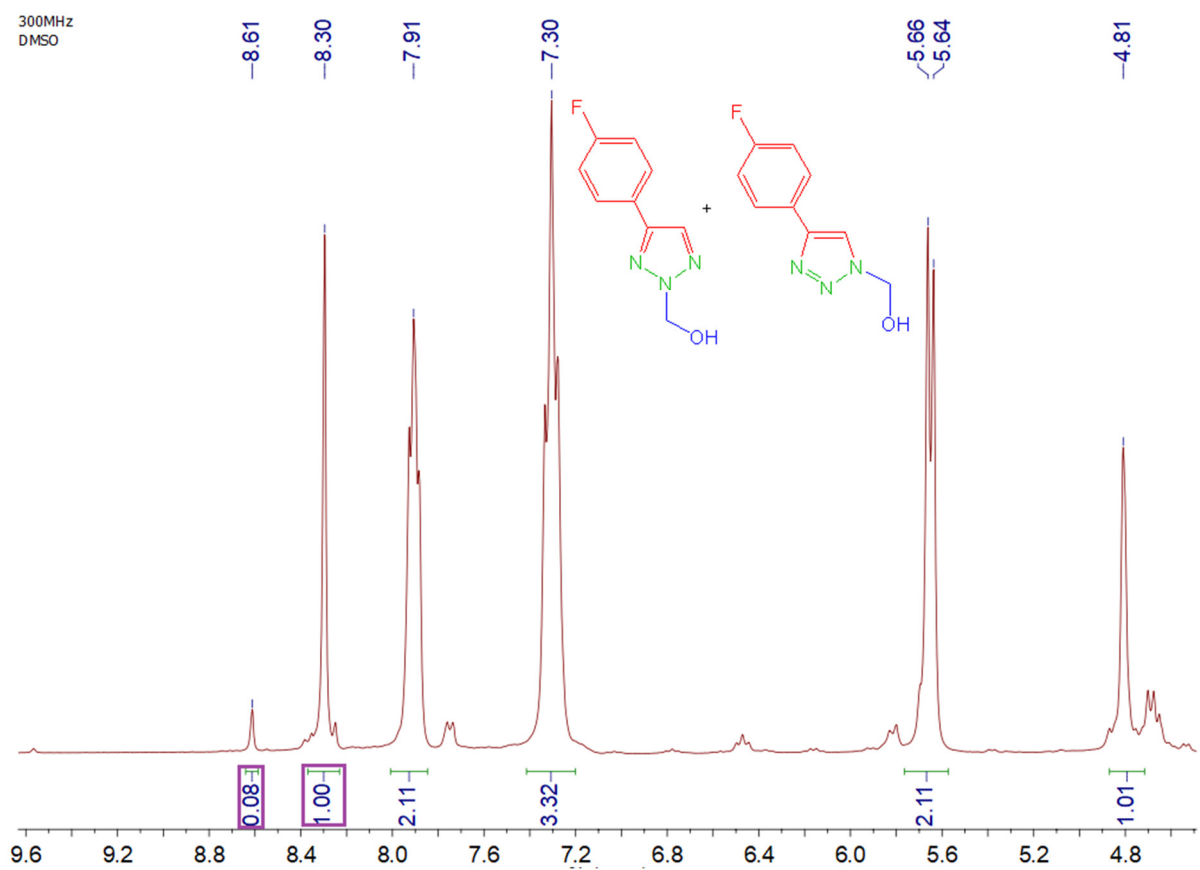

**Figure S98.**  $^1\text{H}$  NMR spectrum of (4-(4-fluorophenyl)-2H-1,2,3-triazol-2-yl)methanol (the major isomer).

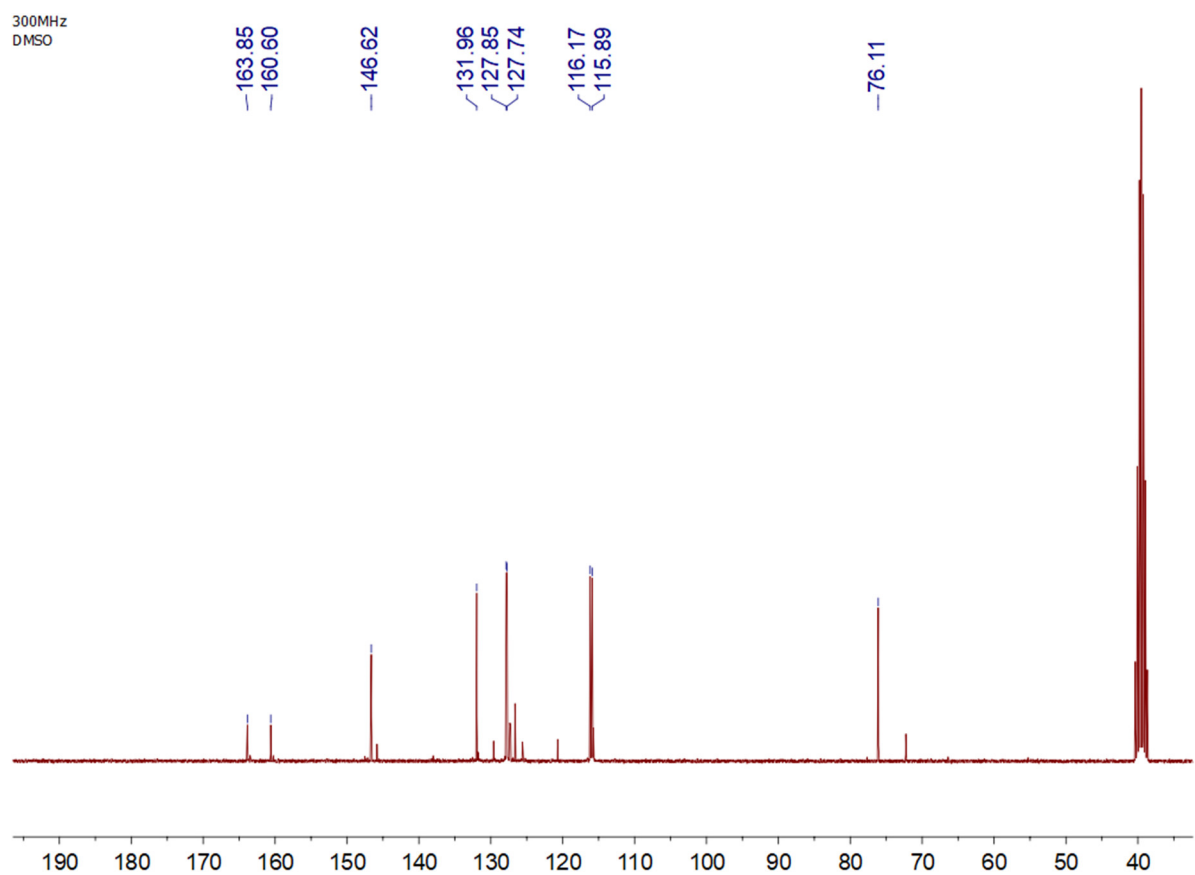

**Figure S99.**  $^{13}\text{C}$  NMR spectrum of (4-(4-fluorophenyl)-2H-1,2,3-triazol-2-yl)methanol (the major isomer).

## 6. ESI-MS (Positive Mode) Spectra of Triazole Products

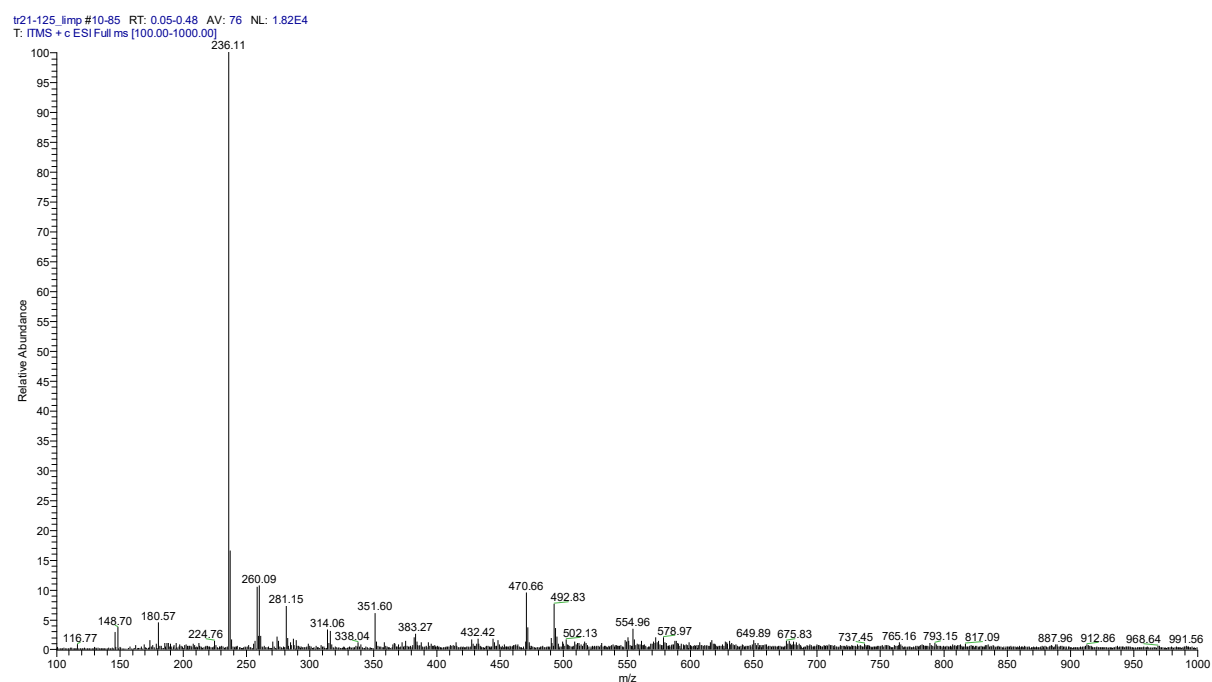

Figure S100. ESI-MS spectra of 1-benzyl-4-phenyl-1H-1,2,3-triazole.

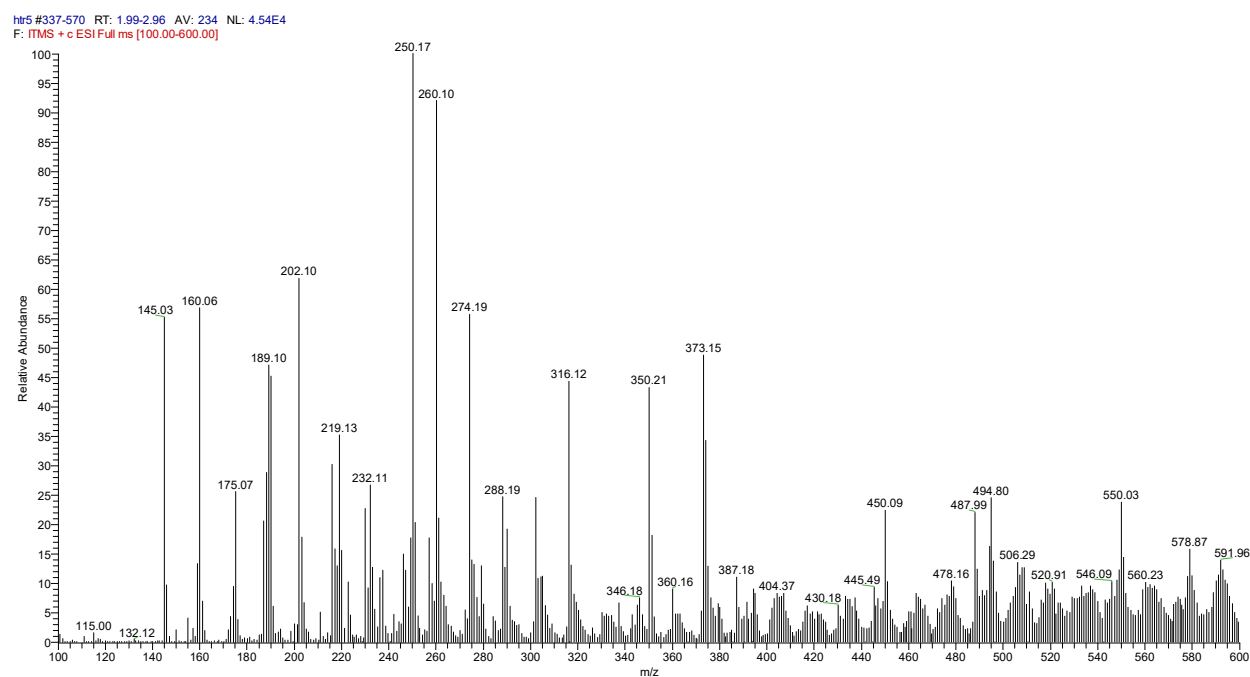

Figure S101. ESI-MS spectra of Hydroxymethyl-1,2,3-triazole.

SS1 #14-206 RT: 0.07-1.14 AV: 193 NL: 6.67E3  
T: ITMS + c ESI Full ms [100.00-1000.00]

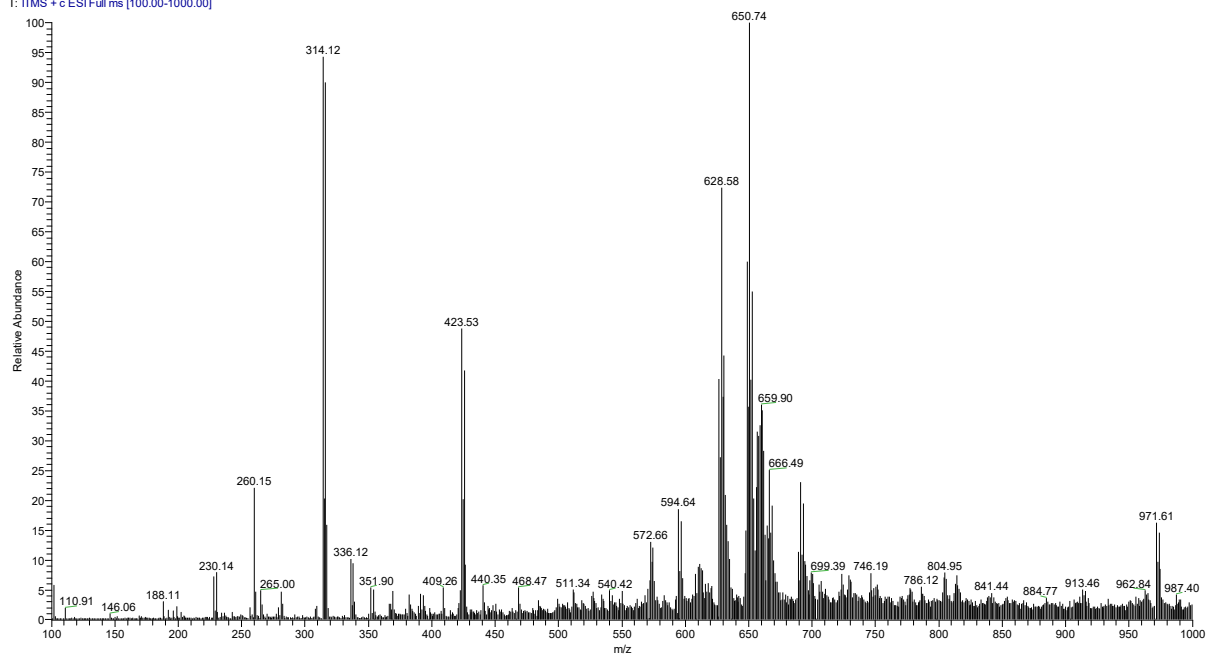

**Figure S102.** ESI-MS spectra of 1-(2-bromobenzyl)-4-phenyl-1H-1,2,3-triazole

SS2 #11-216 RT: 0.06-1.39 AV: 206 NL: 4.76E3  
F: ITMS + c ESI Full ms [100.00-1000.00]

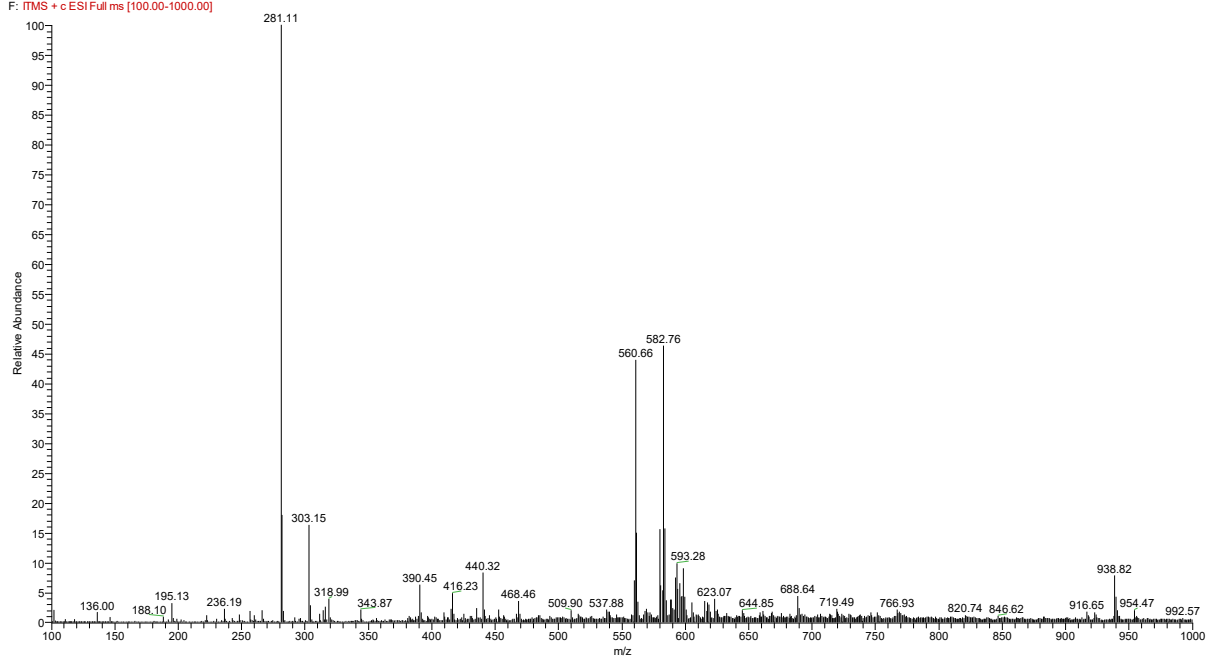

**Figure S103.** ESI-MS spectra of 1-(2-nitrobenzyl)-4-phenyl-1H-1,2,3-triazole.

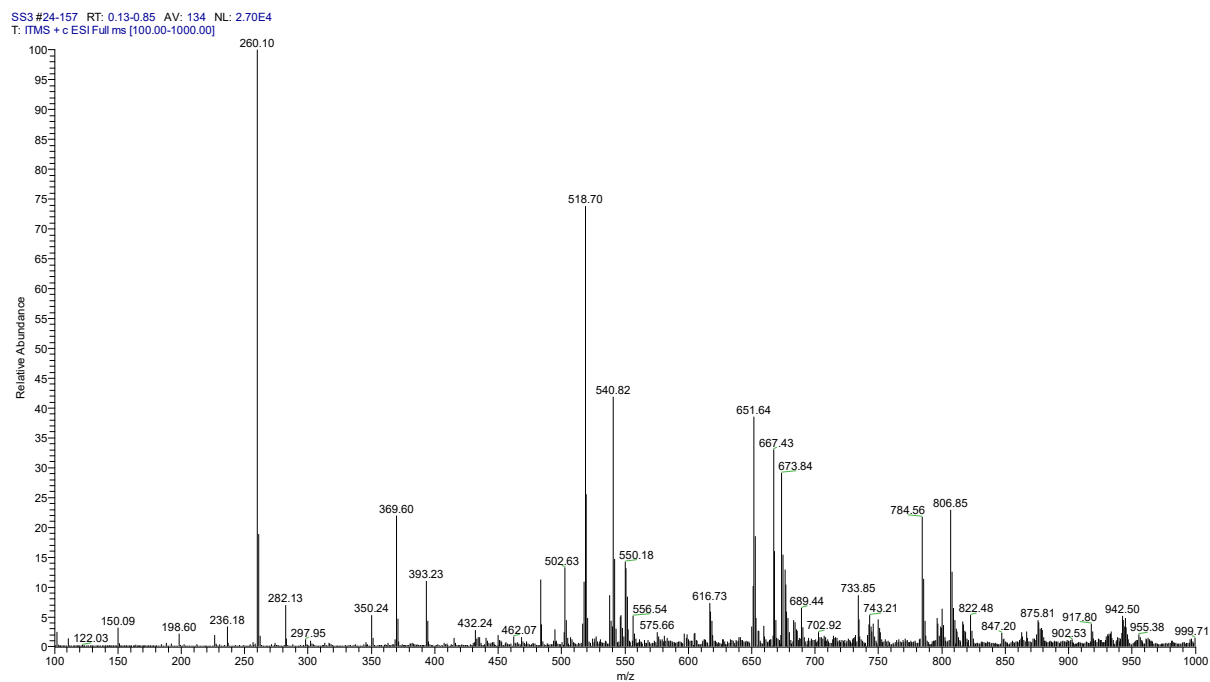

**Figure S104.** ESI-MS spectra of 1,4-bis(1-benzyl-1H-1,2,3-triazol-4-yl)benzene.

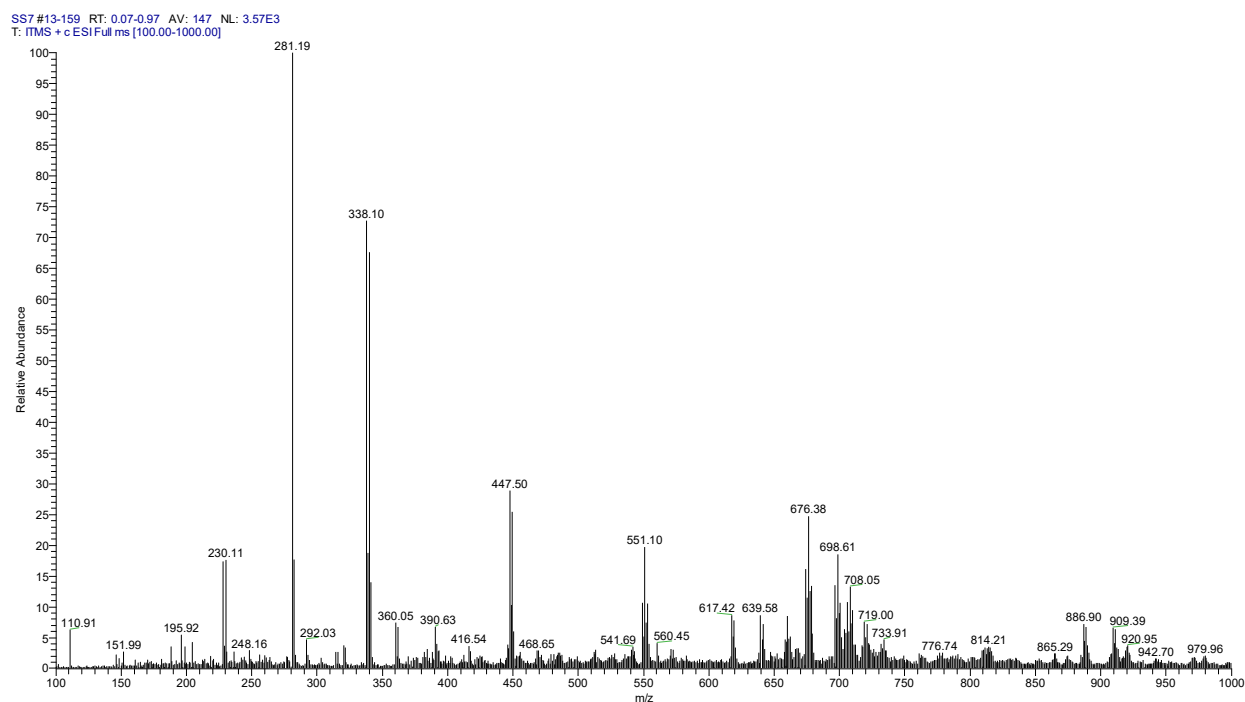

**Figure S105.** ESI-MS spectra of 1,4-bis(1-(3-bromobenzyl)-1H-1,2,3-triazol-4-yl)benzene.

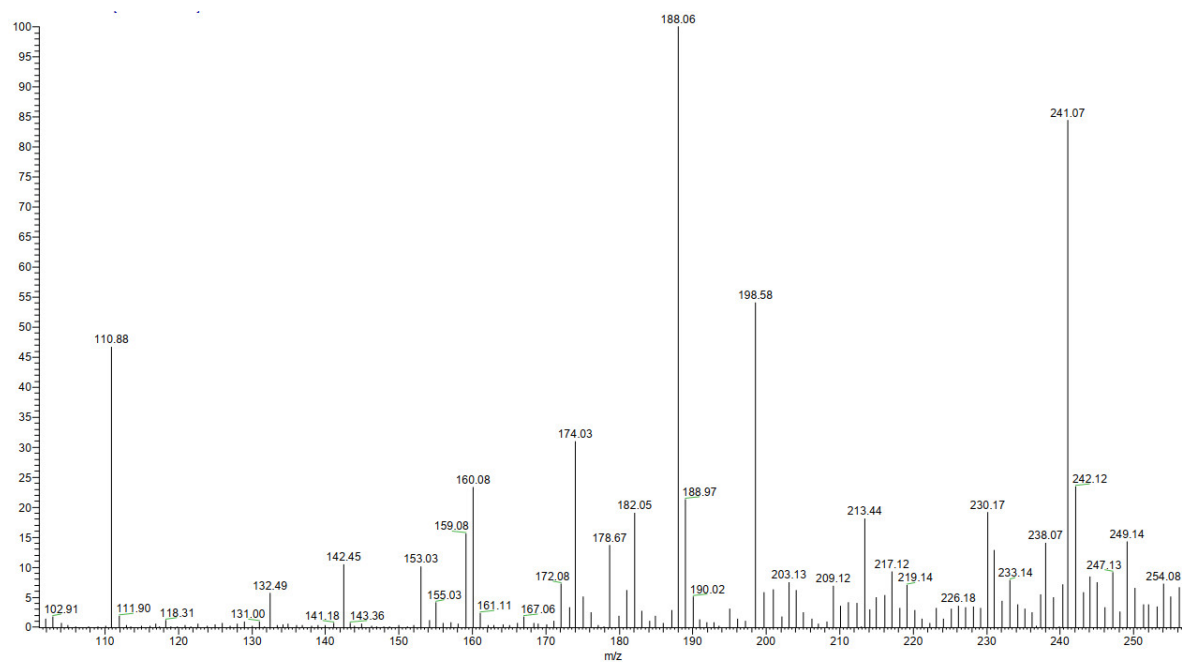

**Figure S106.** ESI-MS spectra of (4-(p-tolyl)-2H-1,2,3-triazol-2-yl)methanol.

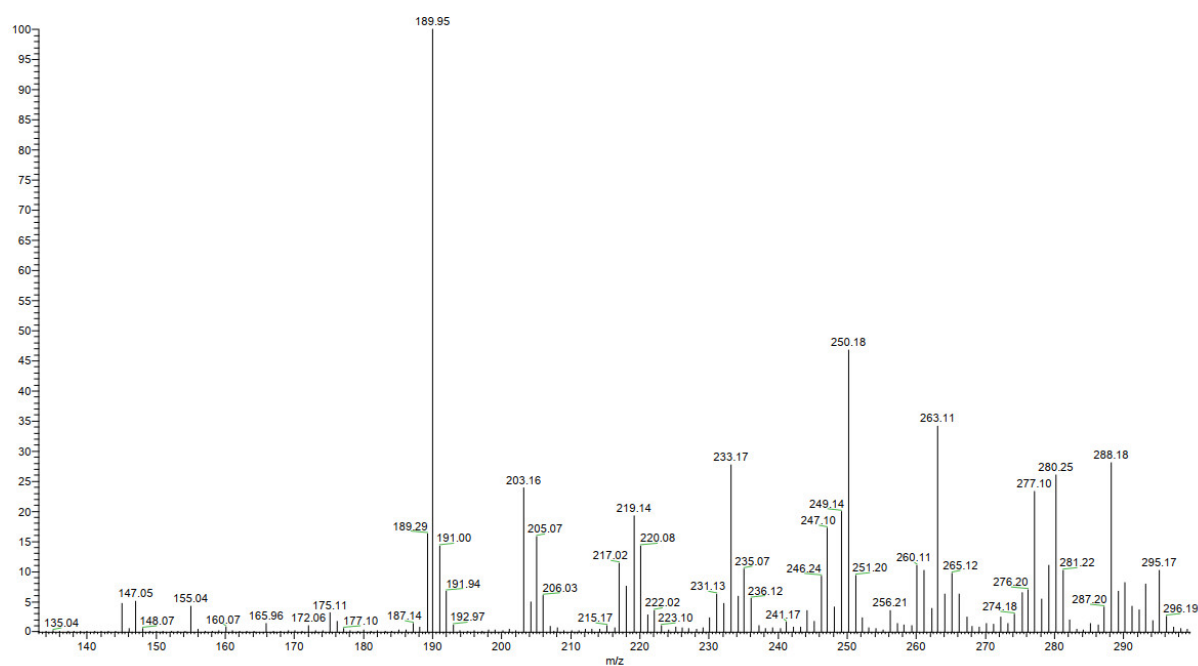

**Figure S107.** ESI-MS spectra of (4-(4-methoxyphenyl)-2H-1,2,3-triazol-2-yl)methanol.

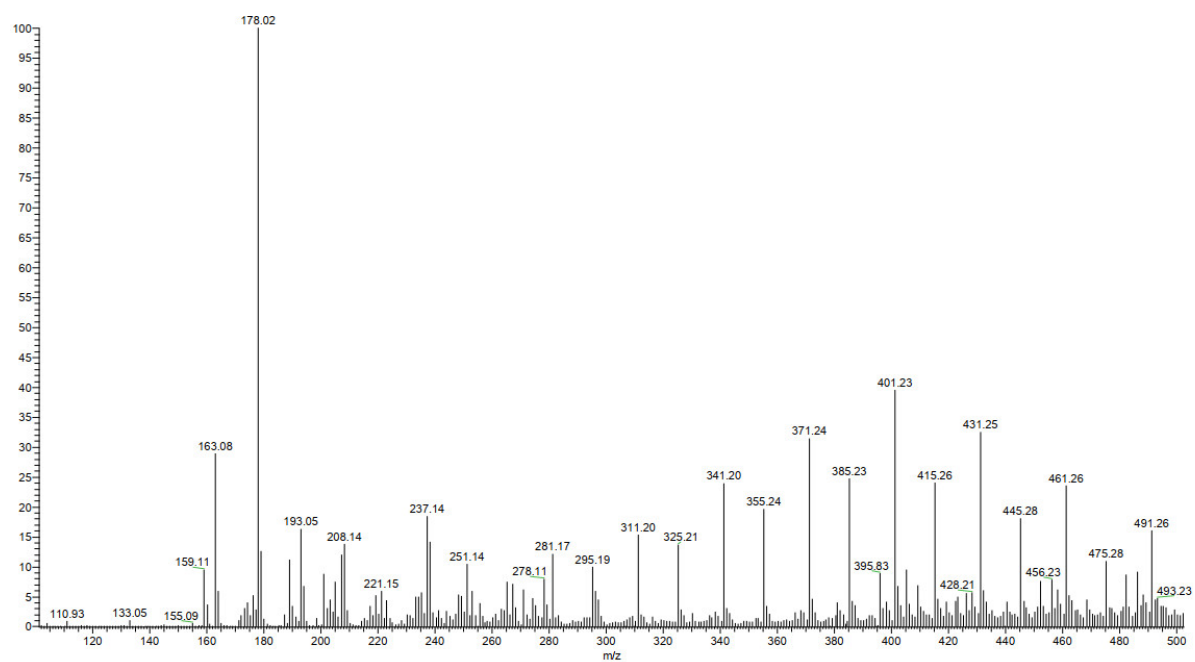

**Figure S108.** ESI-MS spectra of (4-(4-fluorophenyl)-2H-1,2,3-triazol-2-yl)methanol.



**Table S2.** Optimization parameters for **5b** complex as a homogeneous catalyst for the microwave-assisted synthesis of 1-benzyl-4-phenyl-1H-1,2,3-triazole <sup>a</sup>.

| Entry | Cat. Load <sup>b</sup><br>(mol%) | Time<br>(min.) | Solvent                      | Total volume of solvent<br>mixture<br>(mL) | Yield <sup>c</sup><br>(%) | TON <sup>d</sup> |
|-------|----------------------------------|----------------|------------------------------|--------------------------------------------|---------------------------|------------------|
| 1     | 3                                | 15             | -                            | -                                          | -                         | -                |
| 2     | 3                                | 15             | H <sub>2</sub> O:MeCN        | 1.5                                        | 47.17                     | 16               |
| 3     | 3                                | 15             | H <sub>2</sub> O:MeCN        | 1.0                                        | 84.43                     | 28               |
| 4     | 3                                | 15             | H <sub>2</sub> O:MeCN        | 0.5                                        | 91.8                      | 31               |
| 5     | 3                                | 15             | H <sub>2</sub> O:DMF         | 1.0                                        | 51.14                     | 17               |
| 6     | 3                                | 15             | H <sub>2</sub> O:DMSO        | 1.0                                        | 56.1                      | 19               |
| 7     | 3                                | 15             | H <sub>2</sub> O:1,4-dioxane | 1.0                                        | 71.23                     | 24               |
| 8     | 3                                | 60             | H <sub>2</sub> O:MeCN        | 1.0                                        | 88.54                     | 30               |
| 9     | 3                                | 60             | H <sub>2</sub> O:MeCN        | 0.5                                        | 93.21                     | 31               |
| 10    | 3                                | 60             | H <sub>2</sub> O:MeCN        | 0.25                                       | 89.81                     | 30               |
| 11    | 3                                | 60             | H <sub>2</sub> O:1,4-dioxane | 0.5                                        | 84.01                     | 28               |
| 12    | 3                                | 60             | H <sub>2</sub> O:1,4-dioxane | 1.0                                        | 94.21                     | 31               |
| 13    | 5                                | 15             | H <sub>2</sub> O:MeCN        | 1.5                                        | 76.50                     | 15               |
| 14    | 5                                | 15             | H <sub>2</sub> O:DMF         | 1.0                                        | 47.74                     | 10               |
| 15    | 5                                | 15             | H <sub>2</sub> O:DMSO        | 1.0                                        | 50.15                     | 10               |
| 16    | 5                                | 15             | H <sub>2</sub> O:1,4-dioxane | 1.0                                        | 83.86                     | 17               |
| 17    | 5                                | 30             | H <sub>2</sub> O:MeCN        | 1.0                                        | 80.75                     | 16               |
| 18    | 5                                | 60             | H <sub>2</sub> O:MeCN        | 1.5                                        | 77.77                     | 16               |
| 19    | 5                                | 60             | H <sub>2</sub> O:MeCN        | 1.0                                        | 97.04                     | 19               |
| 20    | 5                                | 60             | H <sub>2</sub> O:MeCN        | 0.5                                        | 98.74                     | 20               |
| 21    | 5                                | 60             | H <sub>2</sub> O:1,4-dioxane | 1                                          | 90.66                     | 18               |

<sup>a</sup> Reaction conditions: benzyl bromide (0.3 mmol), phenylacetylene (0.3 mmol), NaN<sub>3</sub> (0.3 mmol), catalyst **5b**, solvent mixture H<sub>2</sub>O/organic (1:1 v/v), MW irradiation (30 W), at 125 °C. <sup>b</sup> Isolated yield. <sup>c</sup> Turnover number (moles of product per moles of catalyst).

**Table S3.** Comparison of the present system with other reported C-supported catalysts for the synthesis of 1,4-disubstituted 1,2,3-triazoles.

| Entry | Catalyst (loading)                                                          | Reaction Conditions                                                                        | Yield (%) | Reference |
|-------|-----------------------------------------------------------------------------|--------------------------------------------------------------------------------------------|-----------|-----------|
| 1     | Gerhardite [Cu <sub>2</sub> (NO <sub>3</sub> )(OH) <sub>3</sub> ]<br>(Cu/C) | 10 mol% of the catalyst,<br>dioxane, (1 equiv.) Et <sub>3</sub> N, 60<br>°C and 10-120 min | 92-99     | [72]      |
| 2     | Cu(I)/GO                                                                    | 2 mol% of the catalyst at 40<br>°C for 48 h in inert<br>conditions using<br>deuterated THF | 80-99     | [73]      |
| 3     | Cu(I)/RGO                                                                   | 8 mol % of the catalyst,<br>THF, 40 °C and 24 h                                            | 85-99     | [55]      |
| 4     | Cu/C NPs                                                                    | 0.5 mol% of the catalyst,<br>H <sub>2</sub> O, 70 °C and 4 h                               | 78-98     | [74]      |
| 5     | Cu(I)-DAPTA complex/CNT-<br>ox-Na                                           | 0.5 mol % of the catalyst,<br>H <sub>2</sub> O/MeCN, MW, 80 °C, 15-<br>60 min              | 32-48     | [28]      |
| 6     | Cu(I)- <i>N</i> -alkylated PTA complex<br>( <b>5b</b> )/CNT-ox-Na           | 1.2 mol % of the catalyst,<br>H <sub>2</sub> O/MeCN (1:1), MW, 125<br>°C, 60 min           | 29-80     | This work |
| 7     | <b>5b</b> (Unsupported homogeneous<br>system)                               | 5 mol % of the catalyst,<br>H <sub>2</sub> O/MeCN (1:1), MW, 125<br>°C, 60 min             | 99        | This work |

Abbreviations: Charcoal (C), graphene oxide (GO), reduced graphene oxide (RGO), nanoparticles (NPs), 3,7-diacetyl-1,3,7-triaza-5-phosphabicyclo[3.3.1]nonane (DAPTA) and multi-walled carbon nanotubes treated with nitric acid and NaOH (CNT-ox-Na).
